# Supplementary material for: Prokaryotic Population Dynamics and Viral Predation in a Marine Succession Experiment Using Metagenomics
Source: Front Microbiol. 2019 Dec 19;10:2926. doi: 10.3389/fmicb.2019.02926 (PMC6931264; doi:10.3389/fmicb.2019.02926)
Supplement: Supplementary file 4 [file Table_3.XLSX]

## Sheet: Sheet1
Supplementary Table S3. Recruitment values (RPKG) for all the genomes that recruited >3RPKG in any of the samples. Genomes in red were recovered in this work, while genomes in blue were recovered in Haro-Moreno et al., 2018.
							15m			60m			90m
TAXONOMY	TAXONOMY2	Genome name	Median Intergenic Spacer (bp)	Coding Density (%)	GC (%)	Estimated Genome Size (Mb) (CheckM)	0h	7h	14h	0h	7h	14h	0h	7h
Actinobacteria	Acidimicrobiales	Acidimicrobiaceae bacterium NAT143	25	95	42.73	2.39928	0.01689	0.02507	0.03075	2.28518	3.16761	2.27926	0.16304	0.68482
Actinobacteria	Acidimicrobiales	Acidimicrobiaceae bacterium SAT1505	36	93	51.9	3.2058	0.04273	0.08163	0.06096	8.03939	9.03098	6.07446	0.51978	1.55859
Actinobacteria	Acidimicrobiales	Acidimicrobiales MED-G01	30	95	52.99	2.2342	0.00889	0.25915	0.1687	2.71765	3.06867	0.977914	9.16504	9.28858
Actinobacteria	Acidimicrobiales	Acidimicrobiales MED-G95	30	95	52.75	2.00705	0.00458	0.16899	0.1261	0.64795	0.92205	0.24092	5.84596	6.04676
Actinobacteria	Acidimicrobiales	Actinobacteria bacterium MED873	16	95	43.97	2.24529	0.00467	0.13334	0.06314	5.97954	7.87394	6.53495	3.07447	8.26967
Actinobacteria	Acidimicrobiales	Candidatus Microthrix sp. UBA1984	31	94	50.6	2.63244	0.0155	0.067	0.03795	22.4165	16.5091	11.2052	2.23478	4.05594
Actinobacteria	Acidimicrobiales	Candidatus Microthrix sp. UBA7886	19	95	41.46	1.95878	0.01176	0.16431	0.11792	1.82521	1.28285	0.41306	14.3905	8.60787
Actinobacteria	Acidimicrobiales	Candidatus Microthrix-sp. UBA672	18.5	95	40.18	2.1207	0.00556	0.07433	0.04518	0.80054	0.5244	0.18519	5.46785	3.4396
Actinobacteria	Acidimicrobiales	marine actinobacterium MedAcidi-G1	18	95	42.43	2.08396	0.02277	0.38372	0.16539	17.1402	18.0956	9.66596	12.2787	15.6845
Actinobacteria	Acidimicrobiales	marine actinobacterium MedAcidi-G2A	24	95	43.07	2.16134	0.00507	0.01736	0.01701	3.37957	4.78656	3.47509	0.24703	1.05061
Actinobacteria	Acidimicrobiales	marine actinobacterium MedAcidi-G2B	17	95	44.77	1.72061	0.23173	0.31823	0.22844	7.63234	10.1058	8.60574	3.72337	11.2909
Actinobacteria	Acidimicrobiales	marine actinobacterium MedAcidi-G3	30	94	51.43	2.34001	0.01834	0.098	0.05469	20.1995	22.5523	14.4232	1.9104	5.50194
Actinobacteria	Actinomarinales	Acidimicrobiia bacterium UBA1281	4	95	32.19	1.5167	0.43796	0.36716	0.3088	5.78892	16.0686	33.5176	0.914578	4.35495
Actinobacteria	Actinomarinales	Actinobacteria bacterium MED628	2	97	32.38	1.04792	49.5062	25.9499	21.9977	0.51421	0.62055	1.86662	0.08821	0.24584
Actinobacteria	Actinomarinales	Actinobacteria bacterium MED758	3	96	35.03	1.47365	0.03645	0.03924	0.02131	0.767662	2.36265	4.28313	0.046	0.40981
Actinobacteria	Actinomarinales	actinobacterium SCGC-AAA015-M09	2	95	32.21	1.38348	16.3197	8.51402	7.19932	0.36808	0.46653	0.89006	0.12094	0.22378
Actinobacteria	Actinomarinales	Ca. Actinomarinales MED-G02	2	97	34.09	1.12028	0.23141	0.24197	0.14596	15.7145	17.7462	16.4674	3.4056	9.35939
Actinobacteria	Actinomarinales	Ca. Actinomarinales MED-G97	1	97	33.14	1.13416	7.81628	4.48652	3.8707	0.19966	0.25541	0.48884	0.06387	0.12168
Actinobacteria	Actinomarinales	Ca. Actinomarinales MED-G98	6	97	35.25	1.44741	0.02899	0.12554	0.11089	0.17106	0.35219	0.05297	4.00816	5.36974
Actinobacteria	Actinomarinales	Ca. Actinomarinales MED-G99	2	97	31.82	1.2142	0.11083	0.21642	0.11456	1.11317	1.31166	0.78534	3.63866	7.12962
Actinobacteria	Actinomycetales	Actinomycetales MED-G96	22	94	62.02	2.22268	0.84141	0.62911	0.48285	0.960674	2.90456	3.23098	0.06539	3.0913
Alphaproteobacteria	Erythrobacter	Erythrobacter citreus LAMA-915	41	92	64.3	3.10032	0.031332	0.352072	3.63481	0.024724	0.039256	15.1119	0.0177	0.0519
Alphaproteobacteria	Erythrobacter	Erythrobacter MED-G101	41	92	64.49	2.90468	0.008853	0.343174	7.53607	0.00455	0.021203	25.6217	0.00254	0.04608
Alphaproteobacteria	Erythrobacter	Erythrobacter sp. CPC47	39	93	64.68	2.77965	0.006664	0.338436	3.6841	0.00413	0.022694	15.1988	0.00367	0.04798
Alphaproteobacteria	Erythrobacter	Erythrobacter sp. HI0019	46	90	63.99	3.40198	0.113736	0.391776	3.30436	0.076482	0.092442	13.3569	0.05204	0.08067
Alphaproteobacteria	Erythrobacter	Erythrobacter sp. HI0074	44	91	64.35	3.17894	0.094836	0.397306	3.46251	0.073598	0.09324	14.2704	0.05306	0.08969
Alphaproteobacteria	Erythrobacter	Erythrobacter sp. NAT91	41	92	64.4	3.0624	0.00438	0.17758	2.02217	0.001876	0.01127	11.6557	0.00213	0.02132
Alphaproteobacteria	Erythrobacter	Erythrobacteraceae bacterium RS397	41	92	64.9	2.7741	0.023464	0.397866	4.19959	0.019404	0.038822	17.5215	0.01529	0.04031
Alphaproteobacteria	Erythrobacter	Erythrobacteraceae bacterium UBA1460	42	92	63.92	3.15444	0.007854	0.33033	3.59645	0.003822	0.01505	14.9804	0.00235	0.03636
Alphaproteobacteria	Erythrobacter	Erythrobacteraceae bacterium UBA5093	43	90	63.02	3.13474	0.00756	0.356412	3.89729	0.002044	0.014728	16.3031	0.00188	0.02684
Alphaproteobacteria	Erythrobacter	Sphingomonadaceae bacterium ARS24	42	92	64.72	2.78951	0.022778	0.375564	3.81416	0.007952	0.0371	15.8282	0.00754	0.06658
Alphaproteobacteria	Erythrobacter	Sphingomonadaceae bacterium EAC97	42	93	64.82	2.6255	0.006412	0.342902	3.79235	0.001806	0.01407	15.4609	0.00147	0.02015
Alphaproteobacteria	Erythrobacter	Sphingomonadaceae bacterium SP132	42	93	65.03	2.79595	0.008344	0.415226	4.45673	0.002296	0.014238	18.5081	0.00218	0.02618
Alphaproteobacteria	Parvularculaceae	Parvularculaceae MED-G105	76	90	54.44	2.64284	0.00363	0.11227	0.02421	2.13396	5.52894	1.66175	1.27827	0.25606
Alphaproteobacteria	Rhizobiales	Alphaproteobacteria bacterium NAT189	17	95	29.22	2.06904	0.00571	0.06347	0.0429	7.34534	6.12664	4.89866	1.22915	1.48101
Alphaproteobacteria	Rhizobiales	Alphaproteobacteria MED-G51	14	96	29.6	1.68745	0.01166	0.09718	0.06657	12.0122	10.1436	7.93118	2.75828	3.40252
Alphaproteobacteria	Rhizobiales	PS1 MED-G09	11	96	32.66	1.31858	0.04979	0.18068	0.1127	25.7942	30.4285	40.9143	3.42182	6.16815
Alphaproteobacteria	Rhizobiales	Rhizobiales MED-G109	15	95	35.58	1.34254	3.39327	2.97257	3.14501	0.0158	0.01463	0.14089	0.00694	0.00617
Alphaproteobacteria	Rhodobacteraceae	Marinovum sp. ARS101	41.5	92	40.31	2.43951	2.96593	2.6	2.71247	0.02937	0.046	0.19648	0.01047	0.01323
Alphaproteobacteria	Rhodobacteraceae	Marinovum sp. NAT183	41	92	40.17	2.31515	0.15908	0.13737	0.10786	3.62054	7.02444	7.50358	0.16747	0.80866
Alphaproteobacteria	Rhodobacteraceae	Rhodobacteraceae bacterium CPC99	44	92	40.27	2.00512	0.05608	0.05524	0.05429	0.557984	1.98068	3.72561	0.03592	0.2265
Alphaproteobacteria	Rhodobacteraceae	Rhodobacteraceae bacterium SAT2	30	94	37.15	2.84471	0.01358	0.0538	0.0346	2.11338	2.92116	3.0823	0.80339	0.69587
Alphaproteobacteria	Rhodobacteraceae	Rhodobacteraceae MED-G07	40	93	40.25	2.08681	0.18689	0.16288	0.11546	5.3851	10.0616	10.3721	0.22547	1.18254
Alphaproteobacteria	Rhodobacteraceae	Rhodobacteraceae MED-G08	43	92	40.5	2.46168	17.2126	15.8308	16.028	0.05249	0.07672	0.7473	0.0234	0.02078
Alphaproteobacteria	Rhodobacteraceae	Rhodobacteraceae MED-G52	37.5	94	39.73	2.21885	0.14699	0.16564	0.12506	3.81192	11.4735	20.2618	0.22272	1.618
Alphaproteobacteria	Rhodobacteraceae	Rhodobacteraceae MED-G56	16	95	37.28	1.92304	18.6782	15.4393	10.2885	0.07258	0.08094	0.28966	0.05679	0.04081
Alphaproteobacteria	Rhodobacteraceae	Rhodobacteraceae MED-G110	28	94	36.35	2.1213	0.01128	0.01412	0.01099	0.167843	0.758602	3.60343	0.01922	0.10233
Alphaproteobacteria	Rhodobacteraceae	Rhodobacteraceae MED-G111	32	94	37.77	2.58219	0.01967	0.07941	0.05911	3.06813	4.34136	4.57791	1.26105	1.11976
Alphaproteobacteria	Rhodobacteraceae	Rhodobacteraceae MED-G112	53	92	50.2	3.03986	0.01869	0.02409	0.02354	0.288665	1.71306	4.00343	0.03203	0.16606
Alphaproteobacteria	Rhodobiaceae	PS1 MED-G55	25	94	46.29	1.61617	4.09381	3.68459	4.22943	0.03301	0.03039	0.19847	0.00836	0.01016
Alphaproteobacteria	Rhodobiaceae	Rhodobiaceae bacterium UBA7378	33	92	53.14	2.05354	3.01113	1.69627	1.74455	0.08808	0.06651	0.13929	0.00965	0.01678
Alphaproteobacteria	Rhodospirillaceae	Rhodospirillaceae bacterium MED1079	44.5	92	41.62	2.99492	0.5528	0.68362	0.59834	3.03649	3.09215	2.04184	0.43143	0.55318
Alphaproteobacteria	Rhodospirillaceae	Rhodospirillaceae bacterium NAT39	49	92	41.44	3.36061	0.39335	0.47648	0.41865	2.98336	2.99936	2.0438	0.3896	0.5155
Alphaproteobacteria	Rhodospirillaceae	Rhodospirillaceae MED-G113	49	89	57.79	3.17913	3.27983	4.91111	4.93691	0.0049	0.00588	0.17189	0.00851	0.00465
Alphaproteobacteria	Rhodospirillaceae	Rhodospirillaceae MED-G114	63.5	90	59.21	1.77048	2.11458	3.15143	3.48618	0.01066	0.01901	0.08041	0.00461	0.00527
Alphaproteobacteria	SAR11 Ia	AG-319-F18	3	96	29.15	1.42017	4.37142	3.30746	3.36909	2.5991	3.14621	4.25964	1.21336	1.29323
Alphaproteobacteria	SAR11 Ia	AG-325-C10	3	96	29.53	1.3891	4.63707	3.47546	3.57751	2.76403	3.32198	4.58379	1.20123	1.35291
Alphaproteobacteria	SAR11 Ia	AG-349-L17	2	97	29.28	1.43461	3.86628	2.87681	2.99766	2.18804	2.66978	3.47897	1.13618	1.19464
Alphaproteobacteria	SAR11 Ia	AG-349-O05	2	97	29.17	1.31364	4.38928	3.3296	3.46177	2.49461	3.02904	4.12719	1.23475	1.30089
Alphaproteobacteria	SAR11 Ia	AG-390-A23	3	96	29.41	1.26968	4.88838	3.65234	3.83087	2.65606	3.25477	4.56752	1.31755	1.36999
Alphaproteobacteria	SAR11 Ia	AG-390-D18	4	96	29.2	1.42157	4.27574	3.27551	3.32881	7.63348	9.11381	12.4607	3.43179	4.17938
Alphaproteobacteria	SAR11 Ia	AG-390-L03	3	97	29.27	1.43367	3.56676	2.74407	2.78975	6.98707	8.19061	11.1583	3.12647	3.78531
Alphaproteobacteria	SAR11 Ia	AG-390-M19	3	96	29.65	1.47978	4.6177	3.4269	3.69478	2.31799	2.84892	3.87067	1.12993	1.16286
Alphaproteobacteria	SAR11 Ia	AG-414-O11	2	96	29.71	1.34667	185.64	123.568	135.425	9.70384	11.1777	22.3496	4.10264	5.10117
Alphaproteobacteria	SAR11 Ia	AG-422-D23	2	96	29.29	1.41733	4.20064	3.13586	3.26396	2.41147	3.07954	4.25728	1.21585	1.2644
Alphaproteobacteria	SAR11 Ia	AG-430-E20	3	96	29.81	1.30683	168.659	112.367	123.464	9.49281	10.8958	21.5832	3.85614	4.92207
Alphaproteobacteria	SAR11 Ia	Ca. Pelagibacter sp. HTCC7211	3	97	29.03	1.45689	10.017	7.07921	7.7153	4.519	4.98607	6.53589	1.55874	1.68836
Alphaproteobacteria	SAR11 Ia	Ca. Pelagibacter ubique HIMB083	2	97	29.15	1.40259	4.03004	2.98528	3.10689	2.25981	2.78215	3.81837	1.05601	1.10831
Alphaproteobacteria	SAR11 Ia	Ca. Pelagibacter ubique HTCC7214	3	97	29.24	1.38825	6.05633	4.37644	4.60632	3.26507	3.91376	5.46659	1.27916	1.39807
Alphaproteobacteria	SAR11 Ia	Ca. Pelagibacter ubique HTCC7217	3	97	28.8	1.43361	7.94686	5.78617	6.14799	4.17918	4.6332	6.08639	1.41036	1.57741
Alphaproteobacteria	SAR11 Ia	Ca. Pelagibacter ubique HTCC8051	3	97	29.2	1.39837	3.99441	2.96001	3.06064	3.23638	3.79012	5.06349	1.19041	1.36507
Alphaproteobacteria	SAR11 Ia	Ca. Pelagibacter ubique HTCC9022	3	97	29.51	1.56086	4.16641	3.11394	3.22722	2.89576	3.60839	5.18713	0.51716	0.6146
Alphaproteobacteria	SAR11 Ia	Ca. Pelagibacter ubique SCGC-AAA795-A08	2	96	28.36	0.992493	10.3579	8.06	8.33736	6.06609	7.2569	10.1544	3.98549	4.07609
Alphaproteobacteria	SAR11 Ia	Ca. Pelagibacter ubique SCGC-AAA795-A20	2	96	29.12	1.31376	4.63646	3.49194	3.6035	2.6278	3.24421	4.38467	1.23728	1.26659
Alphaproteobacteria	SAR11 Ia	Ca. Pelagibacter ubique SCGC-AAA795-J21	2	96	29.08	1.44257	5.78406	4.41708	4.51692	3.29349	4.06297	5.46858	1.52952	1.61731
Alphaproteobacteria	SAR11 Ia	Ca. Pelagibacter ubique SCGC-AAA795-P11	2	96	29.24	1.3377	4.64582	3.54927	3.6687	2.70453	3.25893	4.46081	1.26144	1.33188
Alphaproteobacteria	SAR11 Ia	Ca. Pelagibacter ubique SCGC-AAA797-I19	2	96	29.21	1.51685	5.59425	4.13053	4.32797	2.68635	3.14264	4.19832	1.23043	1.28167
Alphaproteobacteria	SAR11 Ia	Pelagibacterales MED-G39	3	97	30.52	1.24483	339.293	227.127	248.266	15.6492	18.0568	38.509	5.63088	7.63521
Alphaproteobacteria	SAR11 Ia	Pelagibacterales MED-G42	2	98	28.34	1.07398	6.82885	4.66438	4.92614	2.60852	2.64921	3.37908	0.41846	0.70107
Alphaproteobacteria	SAR11 Ia2	AG-325-E08	2	96	29.01	1.15241	18.9592	13.4911	14.3877	6.94086	8.03339	10.4631	2.74284	3.661
Alphaproteobacteria	SAR11 Ia2	AG-325-F13	3	96	29.16	1.19837	23.5188	16.4941	17.811	8.59903	9.85971	12.8186	3.34512	4.4398
Alphaproteobacteria	SAR11 Ia2	AG-325-J17	2	96	29	1.16193	16.9039	11.9293	12.8408	6.05868	6.90331	9.07802	2.55935	3.2208
Alphaproteobacteria	SAR11 Ia2	AG-339-N18	3	96	29.36	1.20035	5.25233	3.99396	4.16273	2.8609	3.28683	4.18272	1.61061	1.54628
Alphaproteobacteria	SAR11 Ia2	AG-345-O09	3	96	28.92	1.18002	12.304	8.79982	9.27711	4.73708	5.47126	6.98104	1.77897	2.09891
Alphaproteobacteria	SAR11 Ia2	AG-349-L23	3	96	29.86	1.28609	3.87759	2.91955	3.00712	2.20156	2.54331	3.26145	1.16859	1.20082
Alphaproteobacteria	SAR11 Ia2	AG-390-O04	3	96	28.57	1.14903	3.96613	2.99442	3.04621	2.39672	2.81463	3.6324	1.26657	1.28115
Alphaproteobacteria	SAR11 Ia2	AG-404-P07	2	97	28.5	1.23228	4.25915	3.23482	3.3027	2.58584	3.09335	3.90084	1.41683	1.44012
Alphaproteobacteria	SAR11 Ia2	AG-410-N23	3	96	28.5	1.2913	3.94828	2.95911	3.00339	2.16288	2.54677	3.38316	1.23552	1.22188
Alphaproteobacteria	SAR11 Ia2	AG-422-C23	3	96	28.66	1.36183	5.46333	4.1054	4.25272	3.02845	3.53675	4.47951	1.56273	1.63268
Alphaproteobacteria	SAR11 Ia2	AG-426-G02	3	96	29.63	1.20032	3.86311	2.89948	2.97116	2.16129	2.52487	3.18679	1.14889	1.18811
Alphaproteobacteria	SAR11 Ia2	AG-426-P20	3	96	28.86	1.16447	5.60742	4.20689	4.3125	3.4075	3.97622	5.16155	1.60325	1.73235
Alphaproteobacteria	SAR11 Ia2	AG-430-P08	2.5	97	29.35	1.30827	5.14541	3.61369	3.87556	1.30908	1.55131	1.9278	0.88611	0.91545
Alphaproteobacteria	SAR11 Ia2	AG-447-E22	2	97	28.94	1.17506	4.69713	3.6123	3.65548	2.57405	3.03683	3.9761	1.46126	1.47528
Alphaproteobacteria	SAR11 Ia2	AG-447-N18	3	96	29.49	1.20612	3.83928	2.84406	2.94316	2.16852	2.56439	3.22492	1.12441	1.18378
Alphaproteobacteria	SAR11 Ia2	Ca. Pelagibacter sp. HIMB1321	3	97	29.03	1.32075	4.37655	3.20956	3.34667	2.30167	2.74646	3.6825	1.05471	1.12999
Alphaproteobacteria	SAR11 Ia2	Ca. Pelagibacter sp. RS39	2	97	29.21	1.20009	10.881	7.63399	8.15553	2.38099	2.79453	3.84437	1.20542	1.23188
Alphaproteobacteria	SAR11 Ia2	Ca. Pelagibacter ubique SCGC-AAA795-C09	3	95	28.42	1.27614	5.43543	4.11901	4.23534	3.07864	3.54591	4.48139	1.47104	1.53006
Alphaproteobacteria	SAR11 Ia2	Ca. Pelagibacter ubique SCGC-AAA795-C10	3	95	29.34	1.58147	7.03893	5.47483	5.68054	3.88571	4.68101	6.00452	1.99091	1.98806
Alphaproteobacteria	SAR11 Ia2	Ca. Pelagibacter ubique SCGC-AAA795-D22	3	97	28.81	1.18344	2.98074	2.20653	2.29229	1.24079	1.49736	1.90582	0.79119	0.82001
Alphaproteobacteria	SAR11 Ia2	Ca. Pelagibacter ubique SCGC-AAA795-N08	2	95	29.12	2.0452	3.57101	2.56665	2.76135	1.41186	1.60908	2.11244	0.96757	0.97512
Alphaproteobacteria	SAR11 Ia2	Ca. Pelagibacter ubique SCGC-AAA795-O20	3	96	29.02	1.28227	4.38899	3.25541	3.37765	2.29272	2.6481	3.41439	1.06858	1.08837
Alphaproteobacteria	SAR11 Ia2	Pelagibacterales MED-G41	2	98	27.52	1.04957	6.91832	4.6188	5.05141	2.67394	2.71095	3.60972	0.4809	0.79777
Alphaproteobacteria	SAR11 Ia2	Pelagibacterales MED-G44	2	98	29.4	1.27658	3.94947	2.68363	2.73907	1.04955	1.18608	1.58032	0.1874	0.40167
Alphaproteobacteria	SAR11 Ib	AG-359-O02	2.5	97	29.23	1.2505	3.92141	2.83977	2.91791	1.32204	1.49654	1.80819	0.94929	0.9461
Alphaproteobacteria	SAR11 Ib	Ca. Pelagibacter sp. MED104	2	96	29.37	1.23385	5.42815	3.85045	4.14287	7.40849	7.15543	7.95091	1.08029	1.92832
Alphaproteobacteria	SAR11 Ib	Ca. Pelagibacter ubique SCGC-AAA795-B16	2	95	29.42	1.19213	3.70706	2.86479	2.79811	1.63639	1.83989	2.11107	1.56448	1.35689
Alphaproteobacteria	SAR11 Ib	Ca. Pelagibacter ubique SCGC-AAA795-E22	2	96	28.99	1.16322	3.0172	2.34721	2.35836	1.43907	1.61085	1.95896	1.18782	1.14449
Alphaproteobacteria	SAR11 Ib	Ca. Pelagibacter ubique SCGC-AAA795-F16	2	96	29.07	1.25231	3.13041	2.31321	2.42904	1.37802	1.53796	1.73011	1.23994	1.12368
Alphaproteobacteria	SAR11 Ib	Ca. Pelagibacter ubique SCGC-AAA795-M22	1	96	29.43	1.06561	4.81032	3.44757	3.51523	1.39629	1.48187	1.72828	1.33812	1.1547
Alphaproteobacteria	SAR11 Ib	Pelagibacteraceae bacterium GOM-A3	4	95	30.08	1.72045	4.48172	3.26291	3.45808	2.25753	2.55073	3.01924	1.29678	1.22552
Alphaproteobacteria	SAR11 Ib	Pelagibacteraceae bacterium GOM-A4	3	96	28.86	1.23687	4.35595	3.34575	3.40803	2.81849	3.16117	3.74098	1.71701	1.52707
Alphaproteobacteria	SAR11 Ib	Pelagibacteraceae bacterium GOM-A5	2.5	95	28.73	1.25045	3.84509	2.89741	2.98018	2.36093	2.63255	3.13456	1.38022	1.29
Alphaproteobacteria	SAR11 Ib	Pelagibacterales MED-G106	3	97	29.46	1.18524	6.86394	5.01527	5.21222	10.2269	9.88941	10.8142	1.80094	3.45342
Alphaproteobacteria	SAR11 II	Ca. Pelagibacter sp. MED872	2	96	27.57	1.31385	0.40831	0.35064	0.33409	3.07027	2.93828	2.6375	1.39114	1.36697
Alphaproteobacteria	SAR11 II	Ca. Pelagibacter ubique HIMB058	1	96	29.87	1.12951	3.07129	2.22821	2.28553	1.01935	1.10606	1.21173	0.72845	0.66706
Alphaproteobacteria	SAR11 II	Ca. Pelagibacter ubique SCGC-AAA795-N17	2	96	29.45	1.13954	4.19987	3.09928	3.14399	1.50618	1.67437	1.82591	1.0245	0.96447
Alphaproteobacteria	SAR11 II	Pelagibacterales MED-G40	2	97	29.61	1.02226	0.44694	0.5296	0.41072	5.72072	5.1386	4.02021	6.65721	5.39123
Alphaproteobacteria	SAR11 II	Pelagibacterales MED-G43	1	98	29.4	0.730035	3.8296	2.43183	2.77229	5.82306	5.3982	5.43889	0.86457	1.39347
Alphaproteobacteria	SAR11 IIIa	HIMB114 MED-G102	2	97	29.85	0.998547	6.11103	4.23797	4.50805	0.39449	0.46526	0.82563	0.08633	0.17104
Alphaproteobacteria	SAR11 IIIa	HIMB114 MED-G103	2	97	29.4	1.06174	25.8492	18.9078	20.2302	0.04079	0.03213	0.82983	0.04957	0.02653
Alphaproteobacteria	SAR11 Unc-1	Ca. Pelagibacter sp. MED642	4	96	30.12	1.74512	0.40191	0.36312	0.30877	3.09071	2.84637	2.50593	1.30067	1.48224
Alphaproteobacteria	SAR11 Unc-1	Pelagibacterales MED-G107	4	97	27.9	1.25983	0.41802	0.45325	0.37486	4.47897	4.08438	3.61282	2.90742	2.78246
Alphaproteobacteria	SAR11 Unc-2	Pelagibacterales MED-G108	5	97	29.04	1.22661	0.04386	0.34723	0.18366	1.48287	1.31849	0.65726	9.06814	5.1572
Alphaproteobacteria	SAR11 V	HIMB59 MED-G10	4	98	30.11	1.33067	11.7275	10.1103	9.63798	0.03808	0.04194	0.39441	0.025	0.01898
Alphaproteobacteria	SAR11 V	HIMB59 MED-G104	2	97	31.07	1.55462	11.9424	8.68065	10.788	0.19863	0.21766	0.77898	0.08197	0.09295
Alphaproteobacteria	SAR11 V	Pelagibacteraceae-bacterium-MED724	1	97	30.94	1.19959	41.603	27.3192	31.298	1.00755	1.1426	3.12516	0.16551	0.27167
Alphaproteobacteria	SAR116	Rhodospirillaceae bacterium SP199	50	91	56.53	2.06034	6.9679	8.07863	9.17071	0.16844	0.25024	0.5141	0.00973	0.03706
Alphaproteobacteria	SAR116	SAR116 MED-G04	29	94	57.45	1.97251	11.002	13.4811	15.3262	0.01703	0.01362	0.45962	0.01446	0.00997
Alphaproteobacteria	SAR116	SAR116 MED-G05	51	92	57.38	2.45386	16.2593	18.9842	21.7763	0.40019	0.61561	1.27919	0.02666	0.09
Alphaproteobacteria	SAR116	SAR116 MED-G06	36	93	61.17	2.07972	6.75189	7.90376	8.42433	0.01216	0.01607	0.27118	0.01001	0.0071
Alphaproteobacteria	SAR116	SAR116 MED-G54	46	92	41.44	1.67313	6.59726	6.4721	7.47447	0.14568	0.14037	0.31998	0.00783	0.03342
Alphaproteobacteria	SAR116	SAR116 MED-G115	38	94	61.6	2.20169	2.81645	3.49979	3.4057	0.02376	0.03043	0.13297	0.01283	0.01834
Alphaproteobacteria	SAR116	SAR116 MED-G116	56	91	54.41	2.58281	3.47325	4.24541	4.69349	0.06985	0.09958	0.24376	0.01453	0.02262
Alphaproteobacteria	Sphingomonas	Sphingobium sp. EAC67	45	92	65.96	5.15401	0.97315	1.47391	1.10602	0.279174	1.46185	3.3725	0.453502	3.99035
Alphaproteobacteria	Sphingomonas	Sphingomonadaceae MED-G03	51	92	66.26	3.30613	6.57678	9.92013	7.26825	1.31501	7.07015	15.0169	2.20487	19.5138
Alphaproteobacteria	Unc Alpha	Alphaproteobacteria MED-G100	10	96	28.69	1.86314	10.0093	8.43073	7.67949	0.01499	0.00715	0.27394	0.0163	0.0079
Alphaproteobacteria	Unc Alpha	SAR116 MED139	21	94	31.4	2.00354	9.4835	7.60183	7.34138	0.44664	0.59281	0.77222	0.02463	0.10986
Alphaproteobacteria	Unc Alpha	SAR116 MED662	18	95	31.53	1.66617	14.914	12.1716	12.7816	0.03733	0.03116	0.44222	0.03405	0.02322
Bacteroidetes	Bacte-Unc-1	Bacteroidetes MED-G17	11	96	35.66	1.74424	8.47718	7.59543	10.1724	0.04025	0.04331	0.44506	0.03889	0.04304
Bacteroidetes	Bacte-Unc-2	Bacteroidetes MED-G20	9	96	30.07	1.90274	6.28295	4.92128	3.83258	0.05335	0.04031	0.07438	0.01289	0.01754
Bacteroidetes	Bacte-Unc-2	Bacteroidetes MED-G21	33	95	34.27	1.89485	5.14667	3.29133	2.5558	0.02113	0.03687	0.1227	0.01632	0.01529
Bacteroidetes	Bacte-Unc-2	Crocinitomicaceae bacterium SP4269	9	96	30.24	2.5271	3.23243	2.59881	2.0267	0.06751	0.07175	0.10156	0.00715	0.02239
Bacteroidetes	Bacte-Unc-2	Flavobacteriales bacterium UBA6969	22	95	55.17	2.31533	4.91898	2.99718	5.99602	0.00588	0.00527	0.12694	0.00612	0.0047
Bacteroidetes	Balneolaceae	Balneola sp. MED732	39	93	40.29	1.98468	4.05978	3.16798	4.72305	0.11456	0.12868	0.34609	0.07309	0.08518
Bacteroidetes	Balneolaceae	Rhodothermaeota MED-G12	36	94	41.15	1.81063	6.48455	5.05607	7.64068	0.04078	0.04998	0.39716	0.00423	0.0204
Bacteroidetes	Flavobacteriales-1	Bacteroidetes MED-G13	8	96	30.28	1.67705	5.77924	3.48676	3.60182	0.33171	0.60378	1.21863	0.03147	0.14539
Bacteroidetes	Flavobacteriales-1	Bacteroidetes MED-G62	9	97	30.09	1.67034	0.09106	0.0872	0.10249	2.67539	5.96795	10.5024	0.16814	0.77946
Bacteroidetes	Flavobacteriales-1	Flavobacteriaceae bacterium MED124	9	96	30.1	1.83889	0.65343	0.45009	0.56093	1.20856	3.68837	10.8725	0.03394	0.52588
Bacteroidetes	Flavobacteriales-1	Flavobacteriaceae bacterium MED649	10	96	30.39	1.46479	14.6023	9.80178	13.7691	0.07225	0.12198	0.74968	0.02853	0.05762
Bacteroidetes	Flavobacteriales-1	Flavobacteriaceae bacterium MED819	9	96	29.95	1.9667	4.36583	2.70187	2.85776	0.22003	0.40469	0.80123	0.04249	0.12117
Bacteroidetes	Flavobacteriales-1	Flavobacteriaceae bacterium MED952	14	96	29.73	1.9614	0.03813	0.03659	0.03608	0.655872	6.28824	16.488	0.04637	0.80873
Bacteroidetes	Flavobacteriales-1	Flavobacteriaceae bacterium NAT103	16	95	29.06	1.34816	0.07235	0.11142	0.09291	0.26079	0.39505	0.20494	3.06211	3.04545
Bacteroidetes	Flavobacteriales-1	Flavobacteriaceae bacterium NAT162	10	96	29.87	1.72412	4.65667	3.23985	5.29795	0.03742	0.06222	0.34689	0.01469	0.02831
Bacteroidetes	Flavobacteriales-1	Flavobacteriaceae bacterium SAT210	9	96	30.22	1.61	0.07786	0.08552	0.07757	1.40795	3.02499	5.16873	0.09596	0.38469
Bacteroidetes	Flavobacteriales-1	Flavobacteriales bacterium NAT193	9	96	29.48	1.41738	0.06351	0.06266	0.06393	1.85433	4.21617	7.4054	0.11854	0.52046
Bacteroidetes	Flavobacteriales-1	Flavobacteriales MED-G119	41	94	32.85	1.93345	0.00669	0.00943	0.00522	0.44629	1.70108	5.12907	0.01961	0.20086
Bacteroidetes	Flavobacteriales-1	Flavobacteriales MED-G124	39	94	31.12	1.93181	0.00786	0.01224	0.01361	0.238446	1.44312	6.57579	0.0295	0.20199
Bacteroidetes	Flavobacteriales-1	Flavobacteriales MED-G125	16	96	29.72	1.75076	0.08284	0.17968	0.09505	6.98101	7.77605	4.21273	2.14646	3.13738
Bacteroidetes	Flavobacteriales-1	Flavobacteriales MED-G126	12	96	29.24	1.67201	0.03863	0.04078	0.04446	0.602576	6.83677	18.374	0.01374	0.9106
Bacteroidetes	Flavobacteriales-1	Winogradskyella MED-G128	41	94	33.24	3.0898	0.01175	0.09599	0.03772	1.14318	3.26167	4.42061	0.51602	0.70992
Bacteroidetes	Flavobacteriales-1	Winogradskyella MED-G129	38.5	94	33.05	3.02132	0.00575	0.05064	0.04224	0.738244	2.13669	3.26635	0.24374	0.49885
Bacteroidetes	Flavobacteriales-2	Cryomorphaceae MED-G11	5	97	29.85	1.152	0.32002	0.4324	0.33622	15.4072	26.4176	23.5504	5.02425	15.8789
Bacteroidetes	Flavobacteriales-2	Flavobacteriaceae bacterium MED847	3	97	30.27	1.14368	0.08555	0.07795	0.0667	1.80957	5.55741	9.11733	0.36483	1.27846
Bacteroidetes	Flavobacteriales-2	Flavobacteriaceae bacterium MED884	6	96	29.69	1.30958	0.19321	0.22907	0.16566	8.49366	14.6738	13.2529	1.8467	7.47786
Bacteroidetes	Flavobacteriales-2	Flavobacteriaceae bacterium NAT200	5	96	29.74	1.30388	0.13882	0.20952	0.15883	10.2734	17.9841	16.1305	3.1897	10.5988
Bacteroidetes	Flavobacteriales-2	Flavobacteriales MED-G15	21	94	37.38	1.68945	4.49033	3.76977	5.00791	0.01005	0.01718	0.22317	0.00792	0.01112
Bacteroidetes	Flavobacteriales-2	Flavobacteriales MED-G22	26	94	36.59	1.89623	5.87234	5.49716	6.25913	0.09946	0.19645	0.5222	0.01796	0.07962
Bacteroidetes	Flavobacteriales-2	Flavobacteriales MED-G117	10	96	30.56	1.67748	3.38286	4.07965	3.209	0.03039	0.04921	0.26499	0.01387	0.02114
Bacteroidetes	Flavobacteriales-2	Flavobacteriales MED-G121	5	97	29.64	1.12472	0.10799	0.10286	0.10523	1.98171	6.10943	9.9196	0.3435	1.46955
Bacteroidetes	Flavobacteriales-2	Flavobacteriales MED-G122	5.5	97	29.6	1.29345	1.85511	1.17388	1.06261	2.56863	4.40907	4.16432	0.09348	0.88589
Bacteroidetes	Flavobacteriales-2	Flavobacteriales MED-G127	7	97	28.62	0.974105	0.04825	0.09444	0.16489	0.36739	0.72388	0.181	7.38871	9.77072
Bacteroidetes	Flavobacteriales-3	Cryomorphaceae MED-G14	5	97	28.55	1.61604	6.99446	4.50932	5.78341	0.04845	0.09874	0.41322	0.02995	0.04941
Bacteroidetes	Flavobacteriales-3	Cryomorphaceae MED-G60	3	97	30.26	1.59381	3.50678	2.26381	2.36725	0.34474	0.64777	1.06046	0.0198	0.19
Bacteroidetes	Flavobacteriales-3	Cryomorphaceae MED-G61	4	97	28.37	1.30879	1.10705	0.75911	0.75243	1.94256	3.27146	4.0571	0.0884	0.61627
Bacteroidetes	Flavobacteriales-3	Cryomorphaceae MED-G65	14	96	29.56	1.89122	0.122	0.11002	0.10537	3.22934	4.98	4.45256	0.14574	0.93279
Bacteroidetes	Flavobacteriales-3	Flavobacteriaceae bacterium MED663	4	96	30.11	1.4019	12.0409	8.2633	7.67078	0.08305	0.15064	0.64025	0.03878	0.05735
Bacteroidetes	Flavobacteriales-3	Flavobacteriaceae bacterium NAT265	5	97	29.51	1.89192	3.88843	2.63946	4.2028	0.04238	0.09333	0.33228	0.01931	0.04656
Bacteroidetes	Flavobacteriales-3	Flavobacteriaceae bacterium UBA5954	14	94	41.7	1.70647	28.2577	15.7169	26.7678	0.03075	0.05724	0.15912	0.0115	0.03292
Bacteroidetes	Flavobacteriales-3	Flavobacteriaceae bacterium UBA7369	12	95	38.82	1.73166	26.0899	13.4145	27.4487	0.08843	0.13127	1.21769	0.04448	0.05503
Bacteroidetes	Flavobacteriales-3	Flavobacteriales MED-G59	12	95	39.78	1.67258	17.3294	12.7634	26.5948	0.07337	0.15272	1.24046	0.03239	0.05438
Bacteroidetes	Flavobacteriales-3	Flavobacteriales MED-G118	4	97	29.5	1.5077	0.09463	0.09398	0.09085	0.19513	1.28627	4.84802	0.01973	0.185
Bacteroidetes	Flavobacteriales-3	Flavobacteriales MED-G120	10.5	96	29.06	1.75992	0.08428	0.07963	0.08651	0.655759	2.13096	5.10964	0.07107	0.33449
Bacteroidetes	Flavobacteriales-3	Flavobacteriales MED-G123	9	96	29.46	1.46219	5.25719	3.6209	5.57647	0.03562	0.06927	0.37391	0.02262	0.03988
Bacteroidetes	Marinoscillaceae	Flammeovirgaceae bacterium NAT269	5	97	30.58	2.0165	0.53342	0.41677	0.36247	2.19838	2.74688	3.12302	0.06412	0.54848
Bacteroidetes	Marinoscillaceae	Marinoscillum sp. MED1001	5	97	31.03	1.86016	0.90709	0.68606	0.62599	2.41086	3.00768	3.4865	0.05427	0.59501
Bacteroidetes	Marinoscillaceae	Rhodothermaeota MED-G16	4	97	29.1	1.87024	0.02323	0.09171	0.03749	13.2607	14.0986	16.5146	1.90359	5.17406
Bacteroidetes	Marinoscillaceae	Rhodothermaeota MED-G18	6	97	31.57	1.94621	0.76776	0.60218	0.53158	5.13713	6.57343	7.57421	0.02816	1.23104
Bacteroidetes	Marinoscillaceae	Rhodothermaeota MED-G19	5	97	29.6	1.92688	0.01704	0.20437	0.13051	4.23567	4.0686	3.11048	7.23257	7.2289
Ca. Dadabacteria	Ca. Dadabacteria	Ca. Dadabacteria MED-G136	7	97	31.29	1.2074	0.02702	0.11556	0.0826	9.85249	7.68067	5.76244	1.86928	1.86321
Ca. Dadabacteria	Ca. Dadabacteria	Ca. Dadabacteria MED-G137	7	97	32.88	1.05786	0.0076	0.07089	0.03554	5.31272	3.91457	2.7075	1.11454	1.1591
Chloroflexi	Chloroflexi	Chloroflexi bacterium MED947	6	96	31.97	1.72974	0.00084	0.08465	0.02769	3.12789	1.8053	0.620466	1.00207	0.55542
Chloroflexi	Chloroflexi	Chloroflexi bacterium NAT137	28	93	38.8	2.10822	0.00731	0.0733	0.08506	0.73603	0.57405	0.10404	3.28591	2.39463
Chloroflexi	Chloroflexi	Chloroflexi bacterium NP972	10	95	31.05	1.61447	0.00454	0.08065	0.03335	9.99442	6.0724	2.62647	1.39969	1.28163
Chloroflexi	Chloroflexi	Chloroflexi MED-G130	9	95	30.57	1.48662	0.02393	0.22492	0.10507	24.5943	15.116	6.45077	4.7469	4.41627
Chloroflexi	Chloroflexi	Chloroflexi MED-G131	9	96	30.76	1.29216	0.00995	0.1229	0.06828	8.61245	5.49358	1.94318	3.28359	2.27558
Chloroflexi	Chloroflexi	Dehalococcoidia bacterium UBA2588	23	94	39.23	2.07483	0.00334	0.08498	0.05603	4.78243	2.76457	1.31228	3.70128	1.78275
Cyanobacteria	Prochlorococcus-HLI	AG-321-D23	43	89	31.05	1.57914	10.7076	9.35199	11.6458	1.86445	1.46769	4.73894	0.13934	0.28334
Cyanobacteria	Prochlorococcus-HLI	AG-335-A05	35	90	30.91	1.63113	8.79243	7.74056	9.66446	1.54123	1.19661	3.76553	0.16713	0.33181
Cyanobacteria	Prochlorococcus-HLI	AG-335-E22	40	89	31.24	1.57135	21.8133	19.3164	24.2333	2.87832	2.40939	8.38237	0.21186	0.46727
Cyanobacteria	Prochlorococcus-HLI	AG-335-I21	36	91	30.99	1.58049	6.45921	5.67059	7.16059	1.36542	1.01511	3.16254	0.1581	0.28304
Cyanobacteria	Prochlorococcus-HLI	AG-335-J19	38	90	31.16	1.58607	15.7629	13.9557	17.7327	2.68796	2.23916	6.92527	0.12811	0.3418
Cyanobacteria	Prochlorococcus-HLI	AG-388-A04	39	90	30.84	1.64859	9.05288	7.92199	9.90673	1.6444	1.32665	4.16842	0.12857	0.27353
Cyanobacteria	Prochlorococcus-HLI	AG-388-B05	41.5	89	30.86	1.71315	20.2487	17.8223	22.6106	2.64684	2.25527	7.72885	0.1483	0.37481
Cyanobacteria	Prochlorococcus-HLI	AG-388-E21	40	90	30.86	1.67941	8.52986	7.47647	9.26964	1.56707	1.20883	3.88895	0.11926	0.25909
Cyanobacteria	Prochlorococcus-HLI	AG-388-I18	38	90	30.93	1.70896	12.8769	11.2441	14.0667	2.22751	1.79251	5.76945	0.12258	0.30366
Cyanobacteria	Prochlorococcus-HLI	AG-388-J02	38	90	30.84	1.74956	14.4421	12.5735	15.8657	2.52672	2.01787	6.61289	0.12256	0.32554
Cyanobacteria	Prochlorococcus-HLI	AG-442-D10	38	90	30.78	1.62112	16.114	14.1252	17.6954	2.83014	2.30828	7.31046	0.13549	0.3681
Cyanobacteria	Prochlorococcus-HLI	AG-459-A09	45	89	30.73	1.79215	13.6957	12.0002	15.118	2.25689	1.81518	5.91574	0.13391	0.33202
Cyanobacteria	Prochlorococcus-HLI	AG-459-J20	45	90	30.9	1.6201	9.65899	8.4416	10.3001	1.71152	1.38983	4.31271	0.0527	0.17753
Cyanobacteria	Prochlorococcus-HLI	AG-459-O03	42	90	30.73	1.66535	14.6527	13.0607	16.2159	2.63528	2.14847	6.78521	0.15319	0.36978
Cyanobacteria	Prochlorococcus-HLI	AG-459-P02	39	89	30.71	1.66773	13.5352	11.6971	14.6663	2.29098	1.8334	6.03689	0.10278	0.28891
Cyanobacteria	Prochlorococcus-HLI	AG-459-P16	46	89	30.81	1.69462	16.1782	14.4676	18.1134	2.79698	2.25963	7.20316	0.10583	0.32477
Cyanobacteria	Prochlorococcus-HLI	AG-469-F22	47	87	31.24	1.87569	10.9327	9.5774	12.0071	1.98334	1.57422	4.97017	0.15966	0.35066
Cyanobacteria	Prochlorococcus-HLI	AG-670-J16	45	89	31.01	1.82618	16.0522	14.2758	17.7726	2.82959	2.28199	7.25456	0.14223	0.38717
Cyanobacteria	Prochlorococcus-HLI	AG-670-L08	38	90	31.11	1.68851	21.407	18.9398	23.947	2.92075	2.40469	8.2502	0.1541	0.38162
Cyanobacteria	Prochlorococcus-HLI	AG-670-N10	37	90	30.81	1.53175	7.88857	6.91336	8.58428	1.47235	1.19968	3.6817	0.11832	0.25713
Cyanobacteria	Prochlorococcus-HLI	AG-670-O07	44	89	30.81	1.75018	13.6809	11.9948	14.9579	2.42541	1.94054	6.2	0.14327	0.35873
Cyanobacteria	Prochlorococcus-HLI	AG-670-O11	39	90	31.38	1.62747	4.38483	4.12309	5.12335	0.84513	0.61586	1.79711	0.15729	0.263
Cyanobacteria	Prochlorococcus-HLI	AG-670-O17	42.5	89	30.89	1.79274	7.14615	6.20006	7.72238	1.3812	1.07522	3.33703	0.11702	0.24509
Cyanobacteria	Prochlorococcus-HLI	AG-673-L20	48	89	30.68	1.72281	5.61986	4.96159	6.02029	0.83932	0.65797	2.01229	0.11367	0.21813
Cyanobacteria	Prochlorococcus-HLI	AG-673-L23	44	89	31.38	1.42365	17.6584	15.7236	19.8723	3.22253	2.64618	8.12341	0.19767	0.4704
Cyanobacteria	Prochlorococcus-HLI	AG-673-O02	40	90	30.94	1.63915	15.8618	13.8923	17.4592	2.74741	2.19465	7.0846	0.14024	0.37533
Cyanobacteria	Prochlorococcus-HLI	AG-676-J23	38	90	31.33	1.53569	16.6133	14.5711	18.6071	3.08676	2.53778	7.78916	0.18616	0.45813
Cyanobacteria	Prochlorococcus-HLI	AG-676-L21	41	89	30.85	1.82037	10.0641	8.86519	10.9728	1.86154	1.46483	4.74262	0.12369	0.30689
Cyanobacteria	Prochlorococcus-HLI	AG-676-O21	38	90	30.91	1.67417	16.4676	14.3481	17.9683	2.74321	2.26875	7.23118	0.14038	0.38913
Cyanobacteria	Prochlorococcus-HLI	AG-676-P03	39	89	31.42	1.56773	13.3927	11.6593	14.7616	2.4174	1.84677	5.94025	0.17325	0.38976
Cyanobacteria	Prochlorococcus-HLI	AG-676-P15-1	48	89	31.01	1.67628	7.93384	6.90568	8.44706	1.36915	1.09398	3.51654	0.07313	0.19028
Cyanobacteria	Prochlorococcus-HLI	AG-676-P23	44.5	89	31.11	1.72477	16.09	14.2124	17.6717	3.01085	2.39312	7.57728	0.16247	0.40876
Cyanobacteria	Prochlorococcus-HLI	AG-679-K21	39	89	31.01	1.66387	4.38953	3.88992	4.90467	0.75333	0.54232	1.68339	0.14379	0.25877
Cyanobacteria	Prochlorococcus-HLI	AG-679-M10	39	89	31.08	1.51046	6.98393	6.17993	7.71798	1.50419	1.14149	3.49405	0.14418	0.2758
Cyanobacteria	Prochlorococcus-HLI	AG-679-M23	41	90	30.75	1.65045	13.3191	11.5864	14.6108	2.18169	1.7499	5.61308	0.12296	0.31295
Cyanobacteria	Prochlorococcus-HLI	AG-679-N02	38	90	31.01	1.68007	17.4818	15.3076	19.3386	2.95474	2.418	7.8354	0.08088	0.29668
Cyanobacteria	Prochlorococcus-HLI	AG-679-N20	40	90	31.03	1.67977	13.9132	12.3032	15.3473	2.50639	2.00611	6.37563	0.14989	0.36332
Cyanobacteria	Prochlorococcus-HLI	AG-679-N22	35	90	31.1	1.59653	20.3904	17.8717	22.9115	2.74986	2.32523	7.81656	0.14771	0.37989
Cyanobacteria	Prochlorococcus-HLI	AG-679-O20	42	90	31.31	1.65973	15.3133	13.5076	17.0271	2.70295	2.29324	7.19129	0.18557	0.428
Cyanobacteria	Prochlorococcus-HLI	AG-679-P16	39	90	31.07	1.65958	14.6979	12.9745	16.0897	2.34997	1.93917	6.10892	0.10787	0.29576
Cyanobacteria	Prochlorococcus-HLI	Prochlorococcus marinus MED4	39	90	30.8	1.66699	20.3421	17.9104	22.429	3.38182	2.7793	8.9196	0.13402	0.41045
Cyanobacteria	Prochlorococcus-HLI	Prochlorococcus MED-G72	37	91	30.88	1.61081	54.6142	48.3487	59.5769	10.9557	9.02182	26.9793	0.36743	1.14475
Cyanobacteria	Prochlorococcus-HLI	Prochlorococcus sp. MED105	35	92	30.9	1.59562	41.4729	36.7066	45.4814	7.85491	6.35933	19.7404	0.1359	0.7151
Cyanobacteria	Prochlorococcus-LLIV	AG-412-I05	78	81	49.29	2.98138	0.04496	0.32006	0.13727	0.18139	0.38325	0.16787	1.51308	6.51742
Cyanobacteria	Prochlorococcus-LLIV	AG-412-I20	69	84	49.81	2.60619	0.02034	0.32508	0.1118	0.16857	0.44257	0.14867	1.72059	7.49759
Cyanobacteria	Prochlorococcus-LLIV	AG-412-L10	73	84	50.33	2.73096	0.15417	0.60697	0.37617	0.31314	0.62338	0.40296	2.32112	9.62537
Cyanobacteria	Prochlorococcus-LLIV	AG-436-P23	74	84	50.52	2.44035	0.14933	1.08523	0.47679	0.53217	1.28454	0.57306	4.90225	21.6502
Cyanobacteria	Prochlorococcus-LLIV	Prochlorococcus marinus MIT-1312	71	84	50.46	2.56843	0.11044	0.56376	0.3027	0.28526	0.61988	0.35083	2.34645	10.0258
Cyanobacteria	Prochlorococcus-LLIV	Prochlorococcus marinus MIT-1313	72	83	49.98	2.59034	0.10398	0.5145	0.27909	0.27018	0.57143	0.31245	2.0969	9.00206
Cyanobacteria	Prochlorococcus-LLIV	Prochlorococcus marinus MIT-1320	70	84	50.35	2.50722	0.10648	0.50649	0.28263	0.26959	0.54878	0.32234	2.07635	8.79082
Cyanobacteria	Prochlorococcus-LLIV	Prochlorococcus marinus MIT-1323	73	84	50.56	2.44729	0.11543	0.56622	0.31258	0.30002	0.63164	0.35447	2.34941	10.0108
Cyanobacteria	Prochlorococcus-LLIV	Prochlorococcus marinus MIT-1342	72	83	50.26	2.548	0.11285	0.54207	0.31643	0.27681	0.5818	0.34992	2.18089	9.10766
Cyanobacteria	Prochlorococcus-LLIV	Prochlorococcus marinus MIT-9303	75	83	50.01	2.68268	0.11035	1.02025	0.38841	0.51608	1.283	0.50213	4.96544	21.6551
Cyanobacteria	Prochlorococcus-LLIV	Prochlorococcus marinus MIT9313	70	84	50.74	2.42396	0.11333	0.52358	0.29673	0.27523	0.58138	0.33416	2.13004	8.92392
Cyanobacteria	Prochlorococcus-LLIV	Prochlorococcus MED-G132	47	91	52.77	1.82522	0.03745	1.97454	0.43637	1.24324	3.54764	0.894777	10.3475	46.1021
Cyanobacteria	Prochlorococcus-LLIV	Prochlorococcus sp. MIT-0701	72	83	50.6	2.59257	0.09941	0.40917	0.25906	0.21499	0.45847	0.28864	1.65372	6.5279
Cyanobacteria	Prochlorococcus-LLIV	Prochlorococcus sp. MIT-1303	72	84	50.47	2.56708	0.11624	0.87056	0.38814	0.43772	1.05277	0.46206	4.01839	17.5838
Cyanobacteria	Prochlorococcus-LLIV	Prochlorococcus sp. MIT-1306	69	84	50.5	2.49894	0.11816	0.94447	0.39297	0.47234	1.1401	0.4838	4.38902	19.1963
Cyanobacteria	Prochlorococus-LLI	AG-331-M18	63	86	35.03	1.99242	0.04832	0.16862	0.06658	19.029	4.76048	7.22088	0.35193	0.73139
Cyanobacteria	Prochlorococus-LLI	AG-388-L21	64	86	35.09	1.90414	0.19822	0.40138	0.28614	28.9289	7.32953	11.0887	0.59388	1.21434
Cyanobacteria	Prochlorococus-LLI	AG-388-O02	61	86	35.08	1.86968	0.18265	0.36614	0.26925	27.3718	7.01168	10.5207	0.55633	1.17106
Cyanobacteria	Prochlorococus-LLI	AG-402-B05	60	86	35.08	1.91028	0.14602	0.23272	0.22746	9.36546	2.35613	3.58769	0.24201	0.46235
Cyanobacteria	Prochlorococus-LLI	AG-402-G08	60	86	35	1.89466	0.17306	0.33524	0.26742	22.949	5.8162	8.83505	0.49183	0.96181
Cyanobacteria	Prochlorococus-LLI	AG-402-I05	63	84	35.03	2.09863	0.15862	0.26106	0.24487	11.0284	2.82315	4.32172	0.27948	0.53593
Cyanobacteria	Prochlorococus-LLI	AG-402-J18	56	86	35.28	1.95401	0.10699	0.26381	0.16908	23.7115	5.95721	9.0765	0.46314	0.96442
Cyanobacteria	Prochlorococus-LLI	AG-412-G19	57	87	35.1	1.78388	0.17192	0.39032	0.27065	30.981	7.94048	11.9151	0.64671	1.28923
Cyanobacteria	Prochlorococus-LLI	AG-412-O03	57	86	35.49	1.9278	0.19058	0.35962	0.28623	25.2284	6.36633	9.67802	0.53625	1.08325
Cyanobacteria	Prochlorococus-LLI	AG-424-E20	60	86	35.28	1.88172	0.22665	0.34698	0.35262	9.21557	2.41107	3.68202	0.28302	0.51685
Cyanobacteria	Prochlorococus-LLI	AG-459-P07	63	85	35.05	1.91825	0.18678	0.38348	0.29404	27.2344	6.93307	10.4573	0.56903	1.19983
Cyanobacteria	Prochlorococus-LLI	AG-673-K22	60	87	35.29	1.97566	0.20106	0.40937	0.30541	32.9753	8.15027	12.4511	0.64804	1.36966
Cyanobacteria	Prochlorococus-LLI	AG-679-I23	59	86	35.28	1.92581	0.19421	0.4221	0.29312	32.4221	8.16946	12.2914	0.64322	1.32591
Cyanobacteria	Prochlorococus-LLI	Prochlorococcus marinus NATL1A	63	86	34.98	1.86978	0.17453	0.35928	0.24814	28.121	7.14087	10.7708	0.58058	1.15914
Cyanobacteria	Prochlorococus-LLI	Prochlorococcus marinus NATL2A	61	86	35.12	1.85309	0.17807	0.37093	0.27134	27.8169	7.02926	10.6952	0.55816	1.17006
Cyanobacteria	Prochlorococus-LLI	Prochlorococcus marinus PAC1	62	86	35.09	1.85639	0.17193	0.33919	0.25705	23.3049	5.88689	8.84906	0.49919	0.96696
Cyanobacteria	Prochlorococus-LLI	Prochlorococcus MED-G73	45	92	35.75	1.40227	0.15354	0.52299	0.23795	66.7663	17.0304	25.3059	1.47746	3.4011
Cyanobacteria	Prochlorococus-LLI	Prochlorococcus sp. MED630	51	90	35.09	1.54248	0.11893	0.4178	0.18014	50.1506	12.694	18.9092	0.91935	1.9848
Cyanobacteria	Prochlorococus-LLI	Prochlorococcus sp. MIT-0801	60	86	34.91	1.94515	0.15526	0.23145	0.23848	7.55004	1.88948	2.928	0.2229	0.39476
Cyanobacteria	Synechococcus-Clade I b	AG-683-A03	49	88	52.7	2.99358	0.18956	0.31105	0.40809	0.354549	1.61866	4.44236	0.12626	1.08875
Cyanobacteria	Synechococcus-Clade I c	AG-686-A03	46	88	52.91	2.64847	0.19767	0.32274	0.42059	1.46004	4.33467	8.8001	0.12713	1.87335
Cyanobacteria	Synechococcus-Clade I c	Prochlorococcus sp. UBA1269	38	90	52.62	2.3	0.54106	0.74281	1.0407	2.05557	6.3184	12.4676	0.104715	3.21229
Cyanobacteria	Synechococcus-Clade I c	Synechococcus MED-G68	41	91	54.55	2.09176	0.06441	0.12747	0.13349	2.27374	6.90251	13.5134	0.116233	3.5278
Cyanobacteria	Synechococcus-Clade II	Synechococcus MED-G134	27.5	94	61.96	1.59381	1.35954	2.80249	4.0718	0.02842	0.14162	0.62213	0.04095	0.10683
Cyanobacteria	Synechococcus-Clade III	Synechococcus MED-G133	25	94	61.87	1.61604	12.2962	26.4247	34.2199	0.119743	0.190879	2.9705	0.07639	0.17129
Cyanobacteria	Synechococcus-Clade III	Synechococcus sp. WH8102	32	91	59.41	2.44765	7.27737	14.7434	21.6128	0.191763	0.527553	3.08459	0.09127	0.32606
Cyanobacteria	Synechococcus-Clade III	Synechococcus sp. WH8103	31	91	59.47	2.43627	7.26735	14.7317	21.6715	0.189007	0.525993	3.10692	0.08889	0.32715
Cyanobacteria	Synechococcus-Clade IV	Synechococcus MED-G69	39	92	55.19	2.07596	0.19603	0.3344	0.32579	0.753181	7.48851	23.0909	0.046368	2.88852
Cyanobacteria	Synechococcus-Clade IV	Synechococcus sp. BL107	38	91	54.24	2.28956	0.21168	0.35842	0.46525	0.275561	3.84471	13.3024	0.08081	1.48143
Cyanobacteria	Synechococcus-Clade IV	Synechococcus sp. CC9902	40	91	54.16	2.24696	0.20226	0.33757	0.44262	0.225238	1.25245	3.80879	0.07944	0.50835
Cyanobacteria	Synechococcus-Clade IX b	Synechococcus MED-G135	44	91	59.2	2.18658	0.05421	0.11259	0.13435	0.276653	2.31806	7.49845	0.04913	1.30434
Cyanobacteria	Synechococcus-Sub5.3	Synechococcus MED-G67	24	94	61.69	2.06304	3.52774	4.2964	5.49775	0.13011	0.25491	0.86254	0.08926	0.50862
Cyanobacteria	Synechococcus-Sub5.3	Synechococcus sp. RCC307	25	93	60.84	2.23295	2.53747	3.14245	4.02132	0.12035	0.23465	0.75462	0.10214	0.44641
Cyanobacteria	Synechococcus-WPC1	Prochlorococcus sp. UBA3999	24	94	60.42	2.41	2.75904	6.48609	10.5425	0.18155	0.31586	1.29519	0.04018	0.24991
Cyanobacteria	Synechococcus-WPC1	Synechococcus MED-G70	27	94	63.08	2.13247	2.6547	6.21761	10.2048	0.14273	0.32284	1.30326	0.04793	0.26098
Cyanobacteria	Synechococcus-WPC1	Synechococcus sp. Kordi49	27	93	61.37	2.60221	2.0627	4.69448	7.63472	0.14008	0.30803	1.14448	0.08157	0.31341
Deltaproteobacteria	Unc. Deltaproteobacteria	Sandaracinaceae MED-G138	40	94	71.87	11.8449	0.126737	5.11376	0.118716	0.03228	0.03467	0.03338	0.01564	0.02139
Euryarchaeota	MGII-A	EUII MED-G33	27	96	48.15	2.25553	0.00425	0.04044	0.0074	7.77112	0.149828	0.07077	0.35323	0.16506
Euryarchaeota	MGII-B	EUII MED-G34	26.5	96	53.64	1.73406	0.01617	0.33045	0.52656	0.81124	1.39266	0.01699	25.7354	20.3119
Euryarchaeota	MGII-B	EUII MED-G35	34	95	52.4	1.83839	0.00805	0.35442	0.17097	1.69036	0.64183	0.01672	12.4522	5.30002
Euryarchaeota	MGII-B	EUII MED-G36	33	95	43.65	1.59745	0.00959	0.47202	0.28066	3.39926	1.19329	0.05103	16.2358	9.45409
Euryarchaeota	MGII-B	EUII MED-G37	37	95	45.79	1.79008	0.00784	0.14777	0.04582	6.91736	0.37597	0.09737	1.87265	1.24502
Euryarchaeota	MGII-B	EUII MED-G38	35	95	35.8	1.8682	0.0187	0.0183	0.01132	4.55934	1.95219	0.250908	0.08132	0.12216
Euryarchaeota	MGII-B	EUII MED-G92	44	94	51.94	2.5385	0.04644	1.43289	0.61533	37.5001	3.71756	0.593012	33.8056	20.8278
Euryarchaeota	MGII-B	EUII MED-G93	27	95	38.26	2.11567	0.01338	0.06899	0.0216	13.944	4.37213	1.30983	0.74714	0.59144
Euryarchaeota	MGII-B	EUII MED-G139	26	96	55.62	1.70433	0.00301	0.06861	0.16179	0.14273	0.37912	0.0062	6.54957	5.05176
Euryarchaeota	MGII-B	Euryarchaeota archaeon NAT260	31	95	50.26	1.73529	0.00655	0.10458	0.02184	8.83285	1.09787	0.183316	0.82877	0.53041
Euryarchaeota	MGII-B	Euryarchaeota archaeon UBA103	29.5	95	46.57	1.70348	0.00458	0.02807	0.00865	4.71437	0.789698	0.441952	0.44199	0.28084
Euryarchaeota	MGII-B	Euryarchaeota archaeon UBA105	34	95	43.97	1.86824	0.00523	0.11215	0.04902	4.5492	0.29876	0.049252	4.07382	1.65665
Euryarchaeota	MGII-B	Euryarchaeota archaeon UBA129	27	95	49.28	1.76576	0.00234	0.07771	0.01943	4.91786	0.318696	0.059486	1.24698	0.56523
Euryarchaeota	MGII-B	Euryarchaeota archaeon UBA174	32	95	51.11	1.97355	0.01003	0.29817	0.22886	1.56303	0.65546	0.0137	20.3056	9.02489
Euryarchaeota	MGII-B	Euryarchaeota archaeon UBA257	29	95	37.96	1.74119	0.02293	0.07156	0.02085	22.7096	4.71437	1.40399	1.18719	0.61713
Euryarchaeota	MGII-B	Euryarchaeota archaeon UBA34	46	93	52.29	1.8501	0.00388	0.08687	0.03976	5.50542	0.260694	0.03822	5.15091	1.40529
Euryarchaeota	MGII-B	Thalassoarchaea	35	94	37.37	3.25032	0.01281	0.04261	0.01379	8.24569	2.46653	0.745318	0.45494	0.34831
Euryarchaeota	MGIII	CG-EUIII-Epi-2	6	97	36.09	1.63908	0.00253	0.03434	0.01263	4.80424	0.910448	0.072772	0.49309	0.16051
Euryarchaeota	MGIII	CG-EUIII-Epi-6	6	96	36.26	1.16315	0.01808	0.01274	0.00705	9.48493	3.57391	0.443996	0.18005	0.16876
Gammaproteobacteria	Alteromonas	Alteromonas macleodii AD006	96	88	44.61	4.62301	0.05843	0.77423	0.39343	0.110292	0.73626	3.161	0.117278	8.94453
Gammaproteobacteria	Alteromonas	Alteromonas macleodii AD037	95	88	44.66	4.6179	0.05388	0.61394	0.31563	0.06694	0.41053	1.74319	0.096096	6.87457
Gammaproteobacteria	Alteromonas	Alteromonas macleodii Amac816	91	88	44.47	4.92326	0.02271	0.75662	0.40262	0.080906	0.767662	3.44047	0.09709	9.80781
Gammaproteobacteria	Alteromonas	Alteromonas macleodii ATCC-27126	93	88	44.71	4.66973	0.05837	0.77048	0.39755	0.111776	0.739452	3.15181	0.119658	8.97677
Gammaproteobacteria	Alteromonas	Alteromonas macleodii Balearic-Sea-AD45	96	88	44.63	4.69283	0.05375	0.53673	0.27224	0.06231	0.35367	1.52905	0.092246	5.83628
Gammaproteobacteria	Alteromonas	Alteromonas macleodii D7	91	88	44.44	4.57562	0.0565	0.58443	0.29712	0.06594	0.38136	1.60804	0.098532	6.28004
Gammaproteobacteria	Alteromonas	Alteromonas macleodii English-Channel-673	91	88	44.81	4.60731	0.06307	0.81665	0.42311	0.121478	0.796418	3.34348	0.126812	9.52449
Gammaproteobacteria	Alteromonas	Alteromonas macleodii HOT1A3	96	88	44.75	4.65287	0.06704	0.80337	0.47009	0.135884	0.963872	4.00313	0.14168	11.7124
Gammaproteobacteria	Alteromonas	Alteromonas macleodii MIT1002	96	87	44.59	4.66716	0.05929	0.76788	0.37735	0.118482	0.724486	3.02742	0.118734	8.51616
Gammaproteobacteria	Alteromonas	Alteromonas macleodii REDSEA-S10-B9	77	87	44.59	4.33496	0.01274	0.4239	0.20506	0.03367	0.27548	1.19204	0.049042	4.74977
Gammaproteobacteria	Alteromonas	Alteromonas macleodii Te101	95	88	44.68	4.63008	0.05876	0.77477	0.40155	0.104636	0.71729	3.06705	0.112182	8.66894
Gammaproteobacteria	Alteromonas	Alteromonas macleodii UBA1010	92	88	44.47	4.79878	0.033	0.69449	0.32831	0.124236	0.6804	3.0378	0.13482	8.16633
Gammaproteobacteria	Alteromonas	Alteromonas macleodii UBA1521	95	88	44.66	4.39633	0.03856	1.19746	0.45101	0.154448	0.886732	4.06165	0.176498	11.4542
Gammaproteobacteria	Alteromonas	Alteromonas MED-G140	86	89	44.58	4.92927	0.03285	1.52965	0.59806	0.12558	1.07745	5.0647	0.141336	13.9189
Gammaproteobacteria	Alteromonas	Alteromonas sp. CPC94	86.5	88	44.81	3.22323	0.02039	0.8138	0.4025	0.090258	0.753004	3.35833	0.092078	9.93065
Gammaproteobacteria	Alteromonas	Alteromonas sp. EAC615	88	88	44.74	3.62747	0.02924	1.00698	0.4335	0.090692	0.874314	3.79173	0.107352	10.8498
Gammaproteobacteria	Alteromonas	Alteromonas sp. NP46	86	89	44.81	4.60331	0.0277	0.9415	0.41303	0.10178	0.817726	3.65954	0.09982	10.4171
Gammaproteobacteria	Alteromonas	Alteromonas sp. RS411	91	87	44.82	4.44041	0.02299	1.0214	0.43314	0.094486	0.840476	3.79771	0.109284	10.9177
Gammaproteobacteria	Alteromonas	Alteromonas sp. W12	98	88	44.67	4.60422	0.03715	0.70698	0.35498	0.05985	0.47604	1.8345	0.091896	8.30883
Gammaproteobacteria	Burkholderiaceae	Burkholderiaceae MED-G174	16	94	38.23	1.94094	7.39367	6.0756	5.9341	0.0096	0.00575	0.18276	0.00777	0.00339
Gammaproteobacteria	Burkholderiaceae	Proteobacteria bacterium MED883	16	94	37.91	1.8044	3.80066	3.12199	2.98915	0.00881	0.0073	0.0843	0.00571	0.00508
Gammaproteobacteria	Limnobacter	Limnobacter MED-G173	32	93	52.5	3.40437	0.014027	0.145496	9.68786	0.007384	0.039637	4.40066	0.00565	0.14131
Gammaproteobacteria	Limnobacter	Limnobacter sp. UBA1615	31	93	52.22	3.38222	0.01617	0.107912	6.24658	0.008246	0.037072	3.0583	0.00783	0.11768
Gammaproteobacteria	Litoricolaceae	Gammaproteobacteria bacterium MED626	4	96	50.56	1.49498	3.89235	4.02641	4.10845	0.00392	0.00624	0.13594	0.00521	0.00217
Gammaproteobacteria	Litoricolaceae	Litoricolaceae MED-G149	9	95	50.27	1.9573	5.40078	5.57123	5.66357	0.00448	0.00657	0.19865	0.00514	0.00196
Gammaproteobacteria	Litoricolaceae	Litoricolaceae MED-G150	8	95	49.98	1.75099	3.02829	2.97596	3.07566	0.00246	0.00047	0.12129	0.00195	0.00233
Gammaproteobacteria	LS-SOB	Proteobacteria bacterium UBA7452	40	92	54.22	2.73301	0.02445	0.14835	0.09545	5.89257	5.72555	3.41888	6.87215	8.7647
Gammaproteobacteria	LS-SOB	SUP05 MED-G171	41	93	54.68	2.65119	0.01295	0.15644	0.09442	3.53894	5.62831	3.28787	4.21538	8.81737
Gammaproteobacteria	LS-SOB	SUP05 MED-G172	41	92	49.4	2.51315	0.02296	0.04456	0.03901	1.89942	3.65998	4.20306	0.58175	2.95138
Gammaproteobacteria	LS-SOB	SUP05 MED-G23	35	93	55.77	1.3675	5.60185	7.16398	6.71199	1.16483	2.5208	2.91416	10.9763	3.94723
Gammaproteobacteria	NOR5	Halieaceae bacterium CPC73	36	93	57.07	2.45191	0.01485	0.02446	0.02967	0.365162	2.16798	5.52808	0.03226	0.74061
Gammaproteobacteria	NOR5	OM60/NOR5 MED-G26	25	94	53.61	2.3213	7.24944	8.27942	10.0838	0.07498	0.12997	0.89755	0.00789	0.03728
Gammaproteobacteria	NOR5	OM60/NOR5 MED-G27	32	93	53	2.47962	6.23556	8.9313	12.835	0.01716	0.01656	0.41456	0.01401	0.01207
Gammaproteobacteria	NOR5	OM60/NOR5 MED-G75	22.5	94	52.56	1.7245	2.92341	3.63636	5.84137	0.09691	0.13706	0.52192	0.00846	0.04836
Gammaproteobacteria	NOR5	OM60/NOR5 MED-G76	28	94	58.03	2.36027	2.33894	2.66423	2.89297	0.03166	0.06741	0.21551	0.00923	0.03092
Gammaproteobacteria	NOR5	NOR5 MED-G151	32	93	57.96	2.35721	4.09553	4.27742	4.53716	0.29663	0.85277	1.50292	0.02314	0.32594
Gammaproteobacteria	NOR5	NOR5 MED-G152	36	93	57.06	2.63678	0.0237	0.03495	0.04426	0.480558	2.87615	7.3475	0.0413	1.05722
Gammaproteobacteria	NOR5	NOR5 MED-G153	30	93	54.74	2.13342	0.04022	0.03238	0.04316	0.837759	1.98505	3.11706	0.00766	0.3768
Gammaproteobacteria	NOR5	SAR116 NAT264	40	92	53.29	2.14772	6.03546	6.96261	8.33585	0.08803	0.13889	0.6945	0.00879	0.03565
Gammaproteobacteria	Oceanococcus	Oceanococcus MED-G154	21	94	60.67	3.76953	0.006773	9.91894	0.012025	0.00179	0.00672	0.00662	0.00366	0.00628
Gammaproteobacteria	OM182	Gammaproteobacteria bacterium MED828	49	92	43.81	2.82356	0.02264	0.05512	0.03371	8.25637	8.118	4.80981	0.36666	1.11023
Gammaproteobacteria	OM182	Gammaproteobacteria bacterium MED876	43	92	54.75	2.51822	3.16994	3.62057	3.93525	0.08162	0.0989	0.2025	0.01038	0.02344
Gammaproteobacteria	OM182	Gammaproteobacteria bacterium NAT661	46	92	54.6	2.52642	3.14038	3.61852	3.81769	0.08559	0.10009	0.20438	0.01389	0.02391
Gammaproteobacteria	OM182	Gammaproteobacteria bacterium SAT1430	49	92	43.96	3.4	0.01713	0.04539	0.02321	6.28996	6.26752	3.7123	0.29925	0.85102
Gammaproteobacteria	OM182	Gammaproteobacteria bacterium UBA6968	108.5	84	51.06	3.6906	4.47143	3.41935	3.88401	0.04795	0.03144	0.12872	0.00707	0.01112
Gammaproteobacteria	OM182	OM182 MED-G24	55.5	89	55.25	2.80078	0.01256	0.01212	0.01548	6.9223	6.2991	3.03491	0.01687	0.69304
Gammaproteobacteria	OM182	OM182 MED-G28	69	90	43.71	3.32306	0.02928	0.26083	0.16057	7.70603	6.89942	3.49189	6.36965	3.95611
Gammaproteobacteria	OM182	OM182 MED-G155	36	94	56.14	2.44165	3.42715	4.03681	4.34793	0.06222	0.07309	0.24121	0.00486	0.01966
Gammaproteobacteria	OM182	OM182 MED-G156	37	92	56.53	2.62457	3.65104	4.30807	4.52243	0.03324	0.03556	0.19031	0.00785	0.00844
Gammaproteobacteria	OM182	OM182 MED-G157	39	92	42.91	2.35858	0.00531	0.00919	0.00657	4.4993	4.22906	2.70982	0.02747	0.6395
Gammaproteobacteria	OM182	OM182 MED-G158	80	89	52.75	3.31256	1.05491	1.35851	1.51944	2.11706	3.08078	3.0055	0.01905	0.37188
Gammaproteobacteria	SAR86 Unc	Gammaproteobacteria bacterium RS390	-1	97	33.31	1.72634	2.97248	1.6016	2.15807	0.03062	0.03421	0.1353	0.03197	0.01593
Gammaproteobacteria	SAR86 Unc	Gammaproteobacteria bacterium SP4189	0	97	33.56	1.54054	3.78683	2.13779	2.89908	0.15434	0.18822	0.39215	0.03301	0.04204
Gammaproteobacteria	SAR86 Unc	SAR86 MED-G79	-1	98	32.84	1.34117	41.1499	24.1463	31.4079	0.120064	0.091112	1.96924	0.09155	0.04989
Gammaproteobacteria	SAR86 Unc	SAR86 MED-G83	-1	97	36.34	1.24616	7.86705	5.10082	7.68655	0.01621	0.01586	0.37276	0.01447	0.01064
Gammaproteobacteria	SAR86 Unc	SAR86 MED-G159	0	97	33.99	1.3984	16.7585	9.20089	13.5074	0.44352	0.58466	1.42799	0.03864	0.12637
Gammaproteobacteria	SAR86 Unc	SAR86 MED-G166	-1	98	34.32	1.21509	1.042	0.79793	0.99418	3.2613	4.40592	5.04451	0.05909	0.68003
Gammaproteobacteria	SAR86A	Gammaproteobacteria bacterium MED709	4	97	31.73	1.69882	4.82852	3.46539	3.96907	0.08902	0.09383	0.31684	0.04134	0.03336
Gammaproteobacteria	SAR86A	Gammaproteobacteria bacterium MED849	3	97	33.65	1.8072	0.22387	0.16554	0.21816	0.850458	1.59344	4.5582	0.04151	0.2608
Gammaproteobacteria	SAR86A	Gammaproteobacteria bacterium MED877	3	97	32.26	1.34265	6.05685	4.08426	4.20595	5.98066	6.39044	7.45493	0.25382	1.09457
Gammaproteobacteria	SAR86A	Gammaproteobacteria bacterium SP266	3	97	31.4	1.47637	5.44939	3.7816	4.01608	0.10803	0.14157	0.37688	0.04371	0.0574
Gammaproteobacteria	SAR86A	SAR86 MED-G78	3	97	32.95	1.38361	0.36711	0.30115	0.33711	2.85803	3.13002	3.17716	1.01221	0.90155
Gammaproteobacteria	SAR86A	SAR86 MED-G85	3	97	31.29	1.67104	41.4568	30.1877	34.055	0.291074	0.33985	2.56109	0.06763	0.07142
Gammaproteobacteria	SAR86A	SAR86 MED-G160	3	97	32.15	1.67019	60.8484	43.204	52.8148	0.195663	0.17927	3.3553	0.10184	0.06178
Gammaproteobacteria	SAR86A	SAR86 MED-G161	3	97	32.52	1.51911	7.3542	5.04999	5.17406	6.71291	7.27438	8.40664	0.23521	1.29524
Gammaproteobacteria	SAR86A	SAR86 MED-G162	3	97	31.23	1.58454	24.5305	17.074	19.0185	0.07306	0.08167	0.85556	0.03364	0.02326
Gammaproteobacteria	SAR86A	SAR86 MED-G163	4	97	32.66	1.69773	5.01688	3.48232	3.85394	3.93507	4.47947	4.47288	0.06596	0.68066
Gammaproteobacteria	SAR86A	SAR86 MED-G164	3	97	32.08	1.59726	14.4481	9.1365	11.0565	0.30065	0.33429	0.83845	0.06389	0.11868
Gammaproteobacteria	SAR86A	SAR86 MED-G167	4	97	33.33	1.43655	0.14398	0.29268	0.21344	2.81498	2.77316	2.34593	5.60954	4.10753
Gammaproteobacteria	SAR86E	SAR86 MED-G82	2	98	35.25	1.56626	4.09928	2.75274	3.42289	0.04188	0.0446	0.2224	0.04362	0.02493
Gammaproteobacteria	SAR86E	SAR86 MED-G84	4	97	35.63	1.69412	4.13983	2.90853	3.11706	1.97663	2.17165	2.84264	0.07764	0.34571
Gammaproteobacteria	SAR86E	SAR86 MED-G165	3	98	36.13	1.42836	0.33263	0.26927	0.31145	1.95461	2.31341	4.14454	0.50853	0.72043
Gammaproteobacteria	SAR86E	SAR86 MED-G168	3	97	36.43	1.84696	0.15211	0.26348	0.23809	8.84036	14.394	32.5311	4.17373	5.89959
Gammaproteobacteria	SAR92	Gammaproteobacteria bacterium MED772	24	95	38.52	1.50477	3.39972	2.91242	2.95719	0.17859	0.20927	0.36966	0.02077	0.07959
Gammaproteobacteria	SAR92	SAR92 MED-G29	35	94	42.44	1.8227	0.05615	0.05056	0.0454	1.5878	2.00724	2.58518	0.01079	0.22362
Gammaproteobacteria	SAR92	SAR92 MED-G169	22	95	38.59	1.96399	3.827	3.3711	3.61032	0.13046	0.17515	0.32094	0.00671	0.03346
Gammaproteobacteria	SAR92	SAR92 MED-G170	43	92	44.28	2.43458	0.01069	0.03688	0.0306	2.06998	3.07992	6.32395	0.66907	0.90648
Gammaproteobacteria	Unc-1	Gammaproteobacteria bacterium MED848	6	96	35.39	1.5974	0.16221	0.16002	0.1449	4.80626	5.00347	5.35564	0.74626	1.13829
Gammaproteobacteria	Unc-1	Gammaproteobacteria MED-G142	7	96	35.99	1.98276	0.13471	0.15019	0.1356	5.38843	5.50241	5.44566	0.79044	1.22782
Gammaproteobacteria	Unc-1	Gammaproteobacteria MED-G144	7	97	35.98	1.86665	0.03257	0.01965	0.01783	2.34332	2.89087	4.06076	0.08645	0.44889
Gammaproteobacteria	Unc-1	Gammaproteobacteria MED-G146	8	97	36.1	1.98077	0.02946	0.40847	0.32419	2.92552	2.87851	1.12098	14.3381	10.2962
Gammaproteobacteria	Unc-1	Gammaproteobacteria MED-G147	9	97	34.96	2.13317	0.01568	0.22677	0.14634	0.98074	0.95035	0.43167	5.7922	4.11265
Gammaproteobacteria	Unc-1	SAR86 cluster bacterium REDSEA-S08-B3	10	95	36.98	2.51881	0.08138	0.10344	0.12815	0.1424	0.25356	0.08136	3.30247	2.20199
Gammaproteobacteria	Unc-1	SAR86 cluster bacterium REDSEA-S09-B4	10	96	37.03	2.46761	0.1553	0.16127	0.21674	0.18885	0.29865	0.13598	3.63404	2.47008
Gammaproteobacteria	Unc-2	Gammaproteobacteria bacterium MED1250	3	97	33.05	1.39871	21.509	13.1906	13.7639	1.75602	1.62221	3.24212	0.05547	0.31233
Gammaproteobacteria	Unc-2	Gammaproteobacteria bacterium MED823	3	97	34.29	1.72492	49.6258	31.6664	33.8461	0.07179	0.0485	1.84909	0.07068	0.03275
Gammaproteobacteria	Unc-2	Gammaproteobacteria bacterium MED859	4	97	33.25	1.47113	17.4326	10.9625	11.5398	0.07586	0.09177	0.71095	0.03257	0.02586
Gammaproteobacteria	Unc-2	Gammaproteobacteria bacterium RS473	2	96	35.81	1.69714	4.4809	2.62144	3.19452	0.03409	0.02949	0.19503	0.02262	0.01939
Gammaproteobacteria	Unc-2	Gammaproteobacteria MED-G141	3	97	33.55	1.38238	7.41706	4.8114	5.9271	0.06719	0.0708	0.35302	0.03197	0.0336
Gammaproteobacteria	Unc-2	Gammaproteobacteria MED-G143	3	98	32.94	1.44793	1.2709	0.7346	0.80225	2.37254	2.23412	3.61036	0.02181	0.38268
Gammaproteobacteria	Unc-2	Gammaproteobacteria MED-G145	2	97	35.5	1.70393	64.3781	40.2312	47.8735	0.304161	0.283972	3.9803	0.14727	0.08911
Gammaproteobacteria	Unc-3	Gammaproteobacteria bacterium NAT262	12	96	37.57	1.83813	0.00236	0.0801	0.06941	0.19965	0.24462	0.06168	3.03552	1.66739
Gammaproteobacteria	Unc-3	Gammaproteobacteria bacterium SAT124	11	96	39.11	2.16	0.01276	0.2017	0.10975	8.53194	8.04504	6.27283	5.60855	4.7936
Gammaproteobacteria	Unc-3	Gammaproteobacteria MED-G148	9	96	39.66	1.64772	0.02798	0.41339	0.23412	15.4427	14.576	10.9909	10.5414	9.15132
Gammaproteobacteria	Unc-4	Gammaproteobacteria bacterium MED781	8	96	30.02	1.41839	3.96066	3.11177	3.16096	0.07182	0.07275	0.23669	0.05957	0.05086
Gammaproteobacteria	Unc-4	Gammaproteobacteria bacterium MED816	8	96	30.37	1.65381	0.52572	0.41496	0.40812	3.26561	3.2795	3.09376	0.39013	0.86206
Kiritimatiellaeota	Kiritimatiellaceae	Kiritimatiellaceae MED-G175	21	93	52.96	1.70978	4.46804	4.24368	4.52081	0.01431	0.0131	0.19071	0.0131	0.00814
Marinimicrobia	Marinimicrobia	Bacteria MED-G45	2	98	32	0.985895	0.14624	0.23684	0.14667	17.7645	14.905	17.342	3.99111	6.74318
Marinimicrobia	Marinimicrobia	Bacteria-MED-G46	8	96	34.61	1.80805	0.01697	0.04243	0.02143	5.13395	3.72557	3.63454	0.71616	1.39902
Marinimicrobia	Marinimicrobia	Bacteria-MED-G47	4	97	28.33	1.42157	0.00646	0.00105	0	3.41664	1.87824	0.941724	0.01135	0.18127
Marinimicrobia	Marinimicrobia	Bacteria MED-G176	14	96	33.63	2.67315	0.05174	0.2446	0.20656	11.8829	9.05077	5.91673	6.2026	5.50011
Marinimicrobia	Marinimicrobia	Bacteria MED-G177	12	96	33.17	1.92324	10.1163	5.3138	3.95261	0.04717	0.03163	0.23504	0.02835	0.01857
Marinimicrobia	Marinimicrobia	Ca. Marinimicrobia bacterium EAC117	10	96	34.1	1.85436	0.00582	0.06988	0.10018	0.34886	0.37473	0.11492	5.08197	4.53379
Marinimicrobia	Marinimicrobia	Ca. Marinimicrobia bacterium NAT51	9	96	34.36	1.94132	0.00402	0.07499	0.10077	0.349	0.35259	0.11198	4.86774	4.49603
Marinimicrobia	Marinimicrobia	Ca. Marinimicrobia MED618	1	98	29.37	1.23385	25.6338	17.7543	17.0954	0.47372	0.45855	1.39089	0.27773	0.29026
Marinimicrobia	Marinimicrobia	Ca. Marinimicrobia MED788	1	97	30.78	1.12499	4.12026	2.78449	2.40152	3.23266	2.74718	3.81433	0.11063	0.5655
Planctomycetes	Phycisphaeraceae	Phycisphaeraceae MED-G178	23	95	57.32	2.03496	5.39759	5.96209	7.37536	0.04365	0.03813	0.33405	0.02472	0.02539
Planctomycetes	Phycisphaeraceae	Phycisphaeraceae MED-G179	75	91	49.09	2.92864	0.07126	0.10335	0.1013	1.36466	3.76583	2.84831	0.097539	3.82568
Proteobacteria	Unc Proteobacteria	Deltaproteobacteria bacterium ARS35	68	89	42.61	3.4674	0.15934	0.26079	0.20648	1.51173	0.72227	0.29195	4.83133	2.51367
Proteobacteria	Unc Proteobacteria	Deltaproteobacteria bacterium NP943	67	89	38.89	2.35006	0.02463	0.23102	0.07551	13.4101	7.31816	3.19196	5.94213	2.77705
Proteobacteria	Unc Proteobacteria	Proteobacteria MED-G180	45	90	45.92	3.69456	7.91069	7.52951	9.35496	0.46375	0.50272	0.52732	0.01608	0.04366
Proteobacteria	Unc Proteobacteria	Proteobacteria MED-G181	73	89	38.97	2.84369	0.02066	0.30617	0.09868	19.3386	11.2897	5.03654	7.86945	3.81988
Proteobacteria	Unc Proteobacteria	Proteobacteria MED-G182	56	92	42.46	2.55759	0.02787	0.50736	0.25616	6.8155	2.84401	0.699842	16.6957	9.05562
Thaumarchaeota	Nitrosopelagicus	Ca. Nitrosopelagicus brevis CN25	25	94	50.6	2.63244	0.02167	0.62919	0.2672	13.7846	11.4692	6.15105	16.6158	18.4024
Thaumarchaeota	Nitrosopelagicus	Thaumarchaeota archaeon NAT229	30	94	32.52	1.0979	0.00259	0.14973	0.13242	0.61991	0.76258	0.24637	7.87695	7.11775
Thaumarchaeota	Nitrosopumilus	Nitrosopumilus MED-G94	39	92	31.19	1.23531	0.07393	1.31828	0.77083	66.086	55.4507	31.5421	49.8472	46.4266
Verrucomicrobia	Pedosphaera/Subdivision_3	Pedosphaeraceae MED-G185	71	90	47.91	4.04418	0.09318	0.12051	0.12123	4.28908	3.84333	2.83615	0.01134	0.24169
Verrucomicrobia	Pedosphaera/Subdivision_3	Pedosphaeraceae MED-G186	34	95	40.45	3.51219	0.00467	0.02603	0.00717	4.88458	4.5138	3.24237	0.1988	0.47981
Verrucomicrobia	Pedosphaera/Subdivision_3	Pedosphaeraceae MED-G187	26	95	56.57	2.55694	0.00108	0.00666	0.00733	3.63095	3.62926	1.97961	0.023	0.34992
Verrucomicrobia	Pedosphaera/Subdivision_3	Verrucomicrobia bacterium SAT47	37	94	40.08	3.42	0.00305	0.01923	0.00427	3.7672	3.37702	2.46399	0.13754	0.332
Verrucomicrobia	Pedosphaera/Subdivision_3	Verrucomicrobia bacterium UBA673	46	92	56.08	2.9794	0.00199	0.07187	0.01759	3.10944	1.49565	0.513128	1.04134	0.29105
Verrucomicrobia	Puniceicoccaceae	Opitutae bacterium UBA1276	30	94	42.58	2.95112	4.27288	2.94269	2.6973	0.14013	0.07504	0.15519	0.00785	0.01339
Verrucomicrobia	Puniceicoccaceae	Puniceicoccaceae bacterium MED785	63	91	50.01	1.71573	5.82848	4.92216	5.01784	0.03608	0.04217	0.27003	0.02244	0.0201
Verrucomicrobia	Puniceicoccaceae	Puniceicoccaceae MED-G30	44	93	52.27	1.92719	6.30584	5.04438	6.22511	0.01645	0.01053	0.2312	0.01368	0.00876
Verrucomicrobia	Puniceicoccaceae	Puniceicoccaceae MED-G31	48	93	43.04	1.56405	2.92405	1.995	1.53167	0.03886	0.02937	0.06346	0.00766	0.01386
Verrucomicrobia	Puniceicoccaceae	Puniceicoccaceae MED-G32	26	96	38.28	0.964389	38.2914	26.0918	27.5177	0.06921	0.04439	0.82117	0.0573	0.03419
Verrucomicrobia	Puniceicoccaceae	Puniceicoccaceae MED-G87	65	92	49.92	1.82678	4.02772	3.80394	3.56034	0.03874	0.04426	0.14065	0.01316	0.01825
Verrucomicrobia	Verrucomicrobiaceae	Akkermansiaceae bacterium UBA5688	56	92	47.99	3.91768	0.03647	0.02121	0.01569	1.28764	1.49351	3.61151	0.00626	0.17024
Verrucomicrobia	Verrucomicrobiaceae	Verrucomicrobia MED-G88	39	95	38.37	2.77038	0.00701	0.0124	0.00893	4.66896	6.75765	4.48486	0.02246	0.57869
Verrucomicrobia	Verrucomicrobiaceae	Verrucomicrobiaceae MED-G183	48	94	42.76	3.81121	0.00894	0.13109	0.04965	3.97241	4.66077	2.13736	3.06384	2.07028
Verrucomicrobia	Verrucomicrobiaceae	Verrucomicrobiaceae MED-G184	54	93	49.1	3.8249	0.03971	0.04515	0.03629	1.37545	2.86615	5.97147	0.0086	0.33919
Verrucomicrobia	Verrucomicrobiaceae	Verrucomicrobiales bacterium NAT181	40.5	94	38.68	3.41994	0.11366	0.15323	0.13915	3.53856	4.94418	3.20065	0.08563	0.46311
Unclassified	Unclassified	Bacteria MED-G188	33	94	50.71	2.09073	0.00334	0.06019	0.06174	0.31651	0.63065	0.23085	2.96652	6.86329
