# Supplementary material for: Prokaryotic Population Dynamics and Viral Predation in a Marine Succession Experiment Using Metagenomics
Source: Front Microbiol. 2019 Dec 19;10:2926. doi: 10.3389/fmicb.2019.02926 (PMC6931264; doi:10.3389/fmicb.2019.02926)
Supplement: Supplementary file 5 [file Table_4.XLSX]

## Sheet: Hoja1
Supplementary Table S4. Recruitment values (RPKG) for all the phage genomes that recruited in any of the samples, together with their putative host classification.
#SEQID	HOST	Length	Med-OCT2015-15m	Med-OCT2015-15m-7h	Med-OCT2015-15m-14h	Med-OCT2015-60m	Med-OCT2015-60m-7h	Med-OCT2015-60m-14h	Med-OCT2015-90m	Med-OCT2015-90m-7h
MAVG-MED-1	Cyanophage	166919	1.17081	0.83041	0.44282	0.21747	0.24093	0.2965	0.10705	0.14854
MAVG-MED-18		46605	0.10795	0.03251	0.05664	0.11725	0.49538	0.14372	0.20004	1.14339
MAVG-MED-2	SAR11	157661	3.43641	1.34278	1.56194	9.08589	7.11397	8.66195	0.64307	1.55147
MAVG-MED-3	Cyanophage	183855	0.02736	0.08033	0.01026	4.88503	3.53226	2.03406	0.0655	0.84737
MAVG-MED-4	SAR11	155847	7.76728	7.36314	6.71491	0.01503	0.00239	0.29369	0.00748	0.01425
MAVG-MED-5	SAR11	164624	1.95583	1.40331	1.20266	2.79542	5.03742	4.48459	0.2808	1.10146
Med-Ae1-75mDCM-C104	Cyanophage	24458	0.56962	0.34066	0.20044	3.08008	2.75574	1.85615	2.81121	2.90499
Med-Ae1-75mDCM-C112	Cyanophage	22492	0	0	0	0.57268	0.24834	0.24816	0	0.06581
Med-Ae1-75mDCM-C132	Cyanophage	19709	0	0	0	0	0	0	0	0
Med-Ae1-75mDCM-C186	Cyanophage	15654	0	0	0	0.22441	0.28546	0.07131	0	0.16548
Med-Ae1-75mDCM-C190	Cyanophage	15321	0	0	0	0.35667	0.46179	0.1943	0	0
Med-Ae1-75mDCM-C219		14289	0	0	0	1.5024	1.5115	0.70313	0.05437	0.72514
Med-Ae1-75mDCM-C221	Cyanophage	14259	0	0	0	0	0	0.0261	0	0
Med-Ae1-75mDCM-C237		13504	0	0	0	2.02331	2.23359	1.04712	0.11506	0.98652
Med-Ae1-75mDCM-C239	Cyanophage	13394	0	0	0	0	0	0.13891	0	0
Med-Ae1-75mDCM-C240	Cyanophage	13364	0.02896	0	0	1.28512	1.7833	1.30869	0.11627	0.88609
Med-Ae1-75mDCM-C248	Cyanophage	13133	0	0	0.02871	2.61544	2.38175	1.44504	0.08873	1.71882
Med-Ae1-75mDCM-C296	Cyanophage	11472	0	0	0	0.61243	0.29214	0.22706	0	0.12903
Med-Ae1-75mDCM-C305		11255	0	0	0	1.00572	1.62118	0.39674	0.03451	0.1644
Med-Ae1-75mDCM-C308		11122	0.45233	0.30646	0.64424	3.12344	2.71196	2.37547	2.58458	3.09432
Med-Ae1-75mDCM-C319		10838	0	0	0	1.65667	2.0615	1.68237	0.10752	0.88775
Med-Ae1-75mDCM-C332	Cyanophage	10597	0	0	0	0.36833	0.84335	0.21069	0	0.3492
Med-Ae1-75mDCM-C74		29448	0.34168	0.21863	0.38418	0.60972	0.74607	0.46754	0.23744	0.32672
Med-Ae1-75mDCM-C85	Cyanophage	26673	0.05803	0	0	0	0.02792	0	0	0
Med-Ae2-600mDeep-C1059		10368	0.59721	0.25569	0.36373	2.89882	3.19651	2.15343	2.92241	2.71259
Med-Ae2-600mDeep-C217		26259	0	0	0.02872	0.08919	0.02836	0.07085	1.00594	0.90192
Med-Ae2-600mDeep-C257		24324	0	0	0	0.12837	0.10716	0	1.2776	1.59742
Med-Ae2-600mDeep-C597		15113	0	0	0	0.12914	0.22175	0.02462	0.92532	1.22429
Med-Ae2-600mDeep-C879	SAR11	11786	0	0	0	0	0	0	0.26367	0.09419
Med-Ae2-600mDeep-C89	SAR11	43595	0	0	0	0	0	0	0	0
Med-Ae2-600mDeep-C93	SAR11	43016	0	0.00881	0	0	0	0	0.00903	0.14625
MedDCM-JUL2012-C1036		12588	0.24594	0.39112	0.11983	3.10077	3.9048	2.54223	0.55546	1.88143
MedDCM-JUL2012-C1060		13966	0.27709	0.1627	0.08101	2.17996	3.1729	1.83845	0.25033	1.40433
MedDCM-JUL2012-C1169		12216	0.53854	0.18601	0.33958	8.24359	13.3209	14.0121	3.37068	5.99792
MedDCM-JUL2012-C1264		16309	0.47457	0.27866	0.32372	4.61909	7.03242	3.49091	1.14329	2.94972
MedDCM-JUL2012-C1266	Cyanophage	13955	0.24958	0.24425	0.16214	1.90198	3.30882	1.57325	0.44538	1.72365
MedDCM-JUL2012-C1439		16663	0.58061	0.34092	0.38474	9.88519	19.3305	18.0886	6.06123	7.21764
MedDCM-JUL2012-C1612		11052	0.28012	0.27414	0.20473	9.00586	16.9813	17.3397	3.93657	6.39525
MedDCM-JUL2012-C1625	Cyanophage	11748	0.52705	0.32237	0.25681	4.38567	6.40278	2.47061	0.69438	2.36245
MedDCM-JUL2012-C315		30990	0.4995	0.31774	0.34073	9.1567	18.4445	17.2548	4.12397	7.84528
MedDCM-JUL2012-C367	Cyanophage	25077	0.09259	0.04531	0.06015	0.82495	0.84641	0.46	0	0.29513
MedDCM-JUL2012-C7	Cyanophage	154128	0.03013	0.02703	0.00734	0.86104	0.75621	0.36697	0.03025	0.17047
MedDCM-JUL2012-C795		14653	0.71308	0.15507	0.20589	10.3355	18.0686	19.4779	5.85877	8.10669
MedDCM-OCT2015-60m-C1158		14368	3.25904	1.87146	1.94227	5.32459	4.32814	4.50637	1.02737	2.54979
MedDCM-OCT2015-60m-C1180		14254	0.08145	0.02657	0.05291	8.26982	8.02016	5.61275	0	1.55768
MedDCM-OCT2015-60m-C1228		13968	0	0	0.027	4.69463	7.19798	4.66206	0.02781	1.61607
MedDCM-OCT2015-60m-C1268		13769	0	0.13752	0	4.62074	3.43465	1.5945	0.02821	0.83315
MedDCM-OCT2015-60m-C1423		12920	0.05991	0.469	0.72971	4.07847	3.8621	1.78568	16.2057	30.4464
MedDCM-OCT2015-60m-C1541		12385	0	0.03058	0	5.7359	8.80953	5.79877	0	1.67324
MedDCM-OCT2015-60m-C1586		12209	0	0	0	4.31598	6.98452	4.17556	0.03182	0.87899
MedDCM-OCT2015-60m-C1652		11969	0.48499	0.47463	0.78769	6.39182	5.00898	3.6064	3.69988	5.00867
MedDCM-OCT2015-60m-C1867		11261	0.44675	0.23542	0.23442	8.73473	16.7653	16.7204	3.24259	6.47372
MedDCM-OCT2015-60m-C189		34889	1.59726	0.97695	0.96201	8.04389	5.40062	5.45013	1.65897	2.5668
MedDCM-OCT2015-60m-C19		105202	3.15987	1.98717	2.33005	6.05882	6.47397	5.09699	0.18462	1.56883
MedDCM-OCT2015-60m-C2034		10812	1.10957	0.8757	1.11614	3.4296	2.82416	2.30591	0.17964	0.6503
MedDCM-OCT2015-60m-C2185		10411	0	0	0	5.21133	3.39791	1.78711	0.14925	0.6398
MedDCM-OCT2015-60m-C24		95347	0.54387	0.42501	0.29268	4.74463	7.19389	4.21103	0.14667	1.31182
MedDCM-OCT2015-60m-C273		29132	1.39482	0.91001	0.82849	7.9453	6.03327	5.54362	1.65346	2.51513
MedDCM-OCT2015-60m-C28		93140	3.51508	1.39062	1.52644	9.24475	7.14846	8.81739	0.64228	1.5058
MedDCM-OCT2015-60m-C295		28404	3.24264	2.32	2.01809	5.00205	3.90677	4.83416	1.0257	2.47536
MedDCM-OCT2015-60m-C370	Cyanophage	25145	0.53866	0.1958	0.35994	6.20918	8.24869	4.17322	1.09685	3.62033
MedDCM-OCT2015-60m-C380		24740	0.15642	0.199	0.01524	3.7865	3.52207	2.22606	0.81648	1.21157
MedDCM-OCT2015-60m-C586		20506	0	0	0.05517	4.54928	3.70451	2.12314	0.01894	0.79403
MedDCM-OCT2015-60m-C774	Cyanophage	17755	0.67568	0.17064	0.1062	3.60536	4.27849	2.38923	0.39382	2.10507
MedDCM-OCT2015-60m-C96		50157	0	0.05285	0	14.7626	7.46132	3.35337	0.17813	0.92962
MedDCM-SEP2013-C109	Cyanophage	29175	0.07959	0.06491	0.02585	0.6288	0.76581	0.44641	0.03994	0.3932
MedDCM-SEP2013-C204		20264	0.09549	0.09345	0.05583	0.71269	0.34915	0.8998	0.01917	0.18262
MedDCM-SEP2013-C221		19020	0.22381	0.19912	0.13879	4.45323	1.58583	1.78035	0	0.13619
MedDCM-SEP2013-C251		17829	0.28217	0.2549	0.29613	5.49506	5.55566	3.6942	0.30503	1.59819
MedDCM-SEP2013-C282	Cyanophage	16712	0	0	0	0	0	0.02227	0	0
MedDCM-SEP2013-C286		16596	0.20987	0.18256	0.02273	0.70557	0.20194	0.87445	0.04681	0.0446
MedDCM-SEP2013-C317	Cyanophage	15790	0	0	0	0	0	0	0	0
MedDCM-SEP2013-C387		14339	0.02699	0.05282	0.0526	0.5172	0.31163	1.01209	0.08127	0.02581
MedDCM-SEP2013-C391	Cyanophage	14265	0.10852	0.0531	0.05287	0.62934	0.91365	0.3652	0	0.20753
MedDCM-SEP2013-C477		12732	0.09119	0.11898	0	3.18832	3.48042	3.1857	0.03051	0.69756
MedDCM-SEP2013-C624		10930	0.24784	0.0693	0.31053	1.21418	1.7716	1.56607	0	0.47399
MedDCM-SEP2013-C63	Cyanophage	36255	0	0	0	0.6675	0.51355	0.26686	0	0.10207
MedDCM-SEP2013-C670		10464	0.2219	0.18096	0.10812	0.52222	0.39145	0.60454	0.03712	0.07073
MedDCM-SEP2013-C80	Cyanophage	33498	0.46211	0.22612	0.2139	2.10904	2.46783	1.73292	0.10437	1.02738
MedDCM-SEP2013-LF-C1		19720	0.35324	0.21125	0.26773	1.80119	2.54922	2.1889	0.13789	0.82568
MedDCM-SEP2013-LF-C2		18284	0.35981	0.08285	0.165	1.66513	2.01625	1.66885	0.14872	0.931
MedDCM-SEP2013-LF-C3		16519	0.16399	0.13756	0.11415	0.68523	0.72135	0.56316	0.02352	0.26882
MedDCM-SEP2013-LF-C8	SAR11	14422	5.55451	4.04403	3.63467	27.5787	34.8312	18.5256	4.76748	8.26219
MedDCM-SEP2014-C1087		14158	0.32801	0.45474	0.50609	1.81957	2.18302	1.81352	0.05487	0.65344
MedDCM-SEP2014-C1126	Cyanophage	13823	0	0	0	0	0	0	0	0
MedDCM-SEP2014-C1262		12874	0.12024	0.11767	0	2.84997	2.74784	1.99439	0.84486	1.46596
MedDCM-SEP2014-C130		40506	0.08599	0.12155	0.03724	1.25271	1.79265	0.87273	0.30688	1.11456
MedDCM-SEP2014-C1333		12523	0.64895	0.42339	0.12045	0.77922	1.18941	0.35657	0	0.20685
MedDCM-SEP2014-C140	SAR11	39830	0.00972	0.05705	0.0284	0.83298	0.5516	0.32699	0.07802	0.40879
MedDCM-SEP2014-C1458		11849	0	0.09589	0	0.06588	0.53425	0.18843	0	0.09369
MedDCM-SEP2014-C1460		11838	0	0.12797	0	1.94536	3.08269	1.94889	0.42659	1.65677
MedDCM-SEP2014-C159	Cyanophage	38011	0.60068	0.23912	0.17858	0.12323	0.08817	0.01958	0	0
MedDCM-SEP2014-C177	Cyanophage	36074	0.01073	0.03149	0	0.07574	0.14452	0.08252	0	0.01026
MedDCM-SEP2014-C1806	Cyanophage	10413	0	0	0	0	0	0	0	0
MedDCM-SEP2014-C1847		10264	0.26393	0.18449	0.07348	1.17889	0.79815	0.58007	0	0.50475
MedDCM-SEP2014-C1868	Cyanophage	10217	0.03788	0	0	0	0	0	0	0
MedDCM-SEP2014-C1911		10100	0.07663	0.11249	0.07468	0.96615	1.17981	0.95791	0.03846	0.36639
MedDCM-SEP2014-C2	Cyanophage	196733	0.0177	0.0308	0.023	7.4302	9.78576	4.28983	0.10465	2.2666
MedDCM-SEP2014-C23		79181	1.64706	0.87528	0.75251	8.14357	5.42708	5.18827	1.78575	2.74803
MedDCM-SEP2014-C380	Cyanophage	24991	0.1084	0.10608	0.04527	0.37485	0.55131	0.43181	0.01554	0.01481
MedDCM-SEP2014-C417	SAR11	23969	0.12916	0.1264	0.0944	0.40711	0.87	0.57442	0	0.18527
MedDCM-SEP2014-C433		23467	3.36414	2.42076	2.00876	4.75702	3.99875	5.05833	1.15873	2.42844
MedDCM-SEP2014-C439		23360	2.68375	2.14003	1.0332	1.58736	7.97037	3.18589	1.36358	4.60983
MedDCM-SEP2014-C450		22965	0.55609	0.26386	0.18064	2.4135	2.85383	1.53933	0.16915	1.25688
MedDCM-SEP2014-C465		22562	0.80616	0.50357	0.61844	1.28021	5.4465	2.63886	0.61982	2.9523
MedDCM-SEP2014-C607		19236	0	0.03938	0	1.09573	2.12941	0.77378	0	0.28856
MedDCM-SEP2014-C669		18337	3.46112	1.96207	2.44734	4.70425	4.06147	5.09354	0.93211	2.38133
MedDCM-SEP2014-C670		18326	2.36511	1.01262	0.63793	0.87326	0.52831	0.34519	0.08479	0.5654
MedDCM-SEP2014-C70	Cyanophage	51688	0.95086	0.79865	0.47424	0.24165	0.20893	0.24477	0.06764	0.11455
MedDCM-SEP2014-C723		17736	0.15274	0.17083	0.27642	2.6629	2.93937	1.46864	0.94179	1.56484
MedDCM-SEP2014-C73	Cyanophage	50070	0.10048	0.05295	0.03766	0.55348	0.78833	0.37902	0.03103	0.31041
MedDCM-SEP2014-C737		17629	0	0.02148	0	4.42821	7.43526	4.81262	0.0661	1.46938
MedDCM-SEP2014-C792		17081	0.61172	0.24389	0.13247	0.7998	2.26726	1.13283	0.47758	1.27821
MedDCM-SEP2014-C812		16841	2.32089	1.05694	1.00767	1.18203	1.59201	1.94441	0.13839	0.46144
MedDCM-SEP2014-C832	Cyanophage	16632	0	0	0	0	0	0	0	0
MedDCM-SEP2014-C880		16144	3.14023	1.54829	2.05564	0.50773	0.55358	0.53014	0	0.04585
MedDCM-SEP2014-C882	Cyanophage	16129	0	0	0	0	0.04617	0	0	0
MedDCM-SEP2014-C892		16015	0	0.04729	0.02355	0.19498	0.32552	0.11618	0.02426	1.0398
MedDCM-SEP2014-C912		15817	2.34881	1.14931	0.83449	0.81436	0.51794	0.25879	0	0.51471
MedDCM-SEP2014-C913		15813	0.22026	0.16765	0.21464	3.8013	5.86363	2.63559	0.54044	5.71006
MedDCM-SEP2014-C945	Cyanophage	15513	0.07484	0.07324	0	0.70451	0.40807	0.62366	0	0.14313
MedDCM-SEP2014-C952		15440	1.00257	0.26982	0.36637	0.27808	0.21706	0.1446	0.02516	0.35951
MedDCM-SEP2014-C962		15341	5.27222	2.93773	2.33532	9.46488	8.81118	8.48963	0.53175	2.55692
MedDCM-SEP2014-C980		15171	0	0.02497	0	1.33787	0.39272	0.29433	0.25605	1.70745
MedDCM-SEP2015HS-C1058		22691	0.08527	0.08345	0.0831	1.37614	2.92111	1.59071	1.48938	1.745
MedDCM-SEP2015HS-C1061		22660	0.03416	0.11699	0.14978	0.91294	1.16675	1.16593	1.98856	1.55142
MedDCM-SEP2015HS-C1076		22533	4.08751	1.91604	1.82424	9.23282	8.3951	7.20015	0.43098	2.34845
MedDCM-SEP2015HS-C1100		22201	0.01743	0.20471	0.10192	1.05488	1.12379	0.9051	1.52225	1.88352
MedDCM-SEP2015HS-C1166		21445	0.07218	0.65342	0.52756	4.82332	4.77516	2.51603	14.8173	35.6163
MedDCM-SEP2015HS-C1252		20564	0	0.01842	0	1.72727	1.90135	1.04953	0	0.46788
MedDCM-SEP2015HS-C126		65805	0.01176	0.22445	0.06304	1.66676	1.24493	0.95	1.34001	1.04035
MedDCM-SEP2015HS-C1265		20418	0	0	0	1.8352	1.24016	0.65609	0	0.41685
MedDCM-SEP2015HS-C1287		20302	0	0	0	1.92259	0.53191	0.07331	0.2296	0.51037
MedDCM-SEP2015HS-C149		61296	0	0	0	2.11413	2.19917	0.92882	0.01268	0.39845
MedDCM-SEP2015HS-C1661		17567	0	0.08623	0.04293	1.33315	0.93269	1.27095	1.85747	1.64309
MedDCM-SEP2015HS-C173		57441	1.61019	0.90986	0.87975	7.91644	5.3353	5.24084	1.75153	2.40943
MedDCM-SEP2015HS-C1733		17126	0	0.13268	0.39636	0.25071	0.76102	0.17382	2.31358	5.50997
MedDCM-SEP2015HS-C1854		16412	0	0.04615	0	4.68523	10.6639	6.80196	0	1.82637
MedDCM-SEP2015HS-C1917		16121	0	0.32889	0.07018	1.08955	0.94705	0.34624	1.32529	1.49206
MedDCM-SEP2015HS-C197		53394	0	0.01419	0	2.14191	1.92485	1.0175	0.03637	0.45049
MedDCM-SEP2015HS-C2093		15317	0	0	0	1.73285	1.33712	0.68023	0.02536	0.26576
MedDCM-SEP2015HS-C2116		15250	0	0.0745	0.12365	1.94523	1.24532	1.29324	1.09532	1.0677
MedDCM-SEP2015HS-C2217		14925	0	0	0	1.80452	1.52194	0.89756	0	0.37192
MedDCM-SEP2015HS-C2221		14908	0.05192	0.07621	0.07589	1.25675	1.07407	1.19811	1.58947	1.81204
MedDCM-SEP2015HS-C235		48915	0.17405	0	0.00771	0.87776	0.85262	0.06846	1.09592	0.98348
MedDCM-SEP2015HS-C2368		14330	0	0	0	1.82497	1.32527	0.80499	0	0.10329
MedDCM-SEP2015HS-C2411		14177	0.62783	0.34728	0.39901	9.71888	20.2775	18.8195	6.13768	7.28257
MedDCM-SEP2015HS-C2416		14155	0	0	0	2.15085	1.47319	0.76237	0.21954	0.52286
MedDCM-SEP2015HS-C243		48199	0.02409	0.14143	0.16431	1.54676	1.41382	0.96504	1.14444	1.07487
MedDCM-SEP2015HS-C265		46612	0.07472	0.86937	0.88996	4.27069	4.59358	2.25924	15.2425	33.9711
MedDCM-SEP2015HS-C2654		13385	0	0.08488	0.14087	1.34142	2.78204	0.86182	4.06303	6.27585
MedDCM-SEP2015HS-C2666		13353	0.14491	0	0	1.05232	1.17126	0.66882	0.32	0.27713
MedDCM-SEP2015HS-C2695		13268	0.02917	0	0	1.02965	1.17876	1.03769	1.66882	1.1993
MedDCM-SEP2015HS-C2716		13227	0.08777	0.14316	0.08553	0.47216	1.21057	0.81585	0.08811	2.07031
MedDCM-SEP2015HS-C2736		13180	0	0.05747	0.02861	6.7522	7.11978	5.33606	0.08842	2.04961
MedDCM-SEP2015HS-C2776		13111	0	0.08666	0.14382	0.47633	0.51123	0.02838	4.38497	7.42309
MedDCM-SEP2015HS-C2777		13109	5.16618	1.79119	1.75483	10.7489	7.27196	7.46552	0.71118	1.7502
MedDCM-SEP2015HS-C284		44659	0	0.03392	0.01689	0.68173	0.47528	0.10832	1.09598	1.00263
MedDCM-SEP2015HS-C293		43923	0.07929	0.12934	0.03434	2.14166	1.99231	1.34704	0.62793	1.63446
MedDCM-SEP2015HS-C2979		12649	0.15297	0.1497	0.11926	3.82641	6.771	6.11901	4.08448	6.02665
MedDCM-SEP2015HS-C3011		12563	0	0.15073	0.12007	0.31069	0.71138	0.02962	4.91637	5.5377
MedDCM-SEP2015HS-C3032		12495	0	0	0	1.31201	1.5497	1.04233	0	0.41463
MedDCM-SEP2015HS-C3106		12350	0	0	0	1.8015	1.35683	0.75326	0	0.17978
MedDCM-SEP2015HS-C3142		12286	0	0.03082	0.06139	0.69894	0.87896	0.18172	1.39118	2.95176
MedDCM-SEP2015HS-C3178		12189	0	0	0	1.85732	2.10796	1.22114	0	0.48575
MedDCM-SEP2015HS-C326		41493	0	0	0.0818	1.38283	0.86154	0.6457	0.22469	1.65883
MedDCM-SEP2015HS-C3266		12023	0.06438	0	0	2.11021	1.39374	0.9904	0.06462	0.5848
MedDCM-SEP2015HS-C3566		11462	0	0	0	1.73675	1.36449	0.68176	0	0.12914
MedDCM-SEP2015HS-C4023		10693	0.47048	0.14167	0.35268	4.23433	6.86038	4.55875	0.43594	10.3475
MedDCM-SEP2015HS-C415		37158	0	0.06115	0.08119	1.86979	2.44522	0.80115	0.22999	2.74866
MedDCM-SEP2015HS-C4154		10493	0	0.18046	0	0.33479	0.03549	0.14185	2.07314	0.88167
MedDCM-SEP2015HS-C420		36924	0.02096	0.05128	0.03064	2.34677	1.16985	1.03801	1.48337	1.41311
MedDCM-SEP2015HS-C4211		10420	0	0	0	0.11238	0.14295	0	1.45391	2.27288
MedDCM-SEP2015HS-C4309		10277	0	0.03685	0	1.63316	1.05078	0.50692	0	0.14403
MedDCM-SEP2015HS-C4437		10117	0.03825	0.48664	0.63368	4.2825	4.12238	1.58158	15.9345	30.5787
MedDCM-SEP2015HS-C4493		10055	0.42336	0.15066	0.22503	8.8119	17.3689	17.2086	3.3997	7.13977
MedDCM-SEP2015HS-C501		33539	0.03462	0.06775	0.05622	2.47888	1.64321	1.06511	1.32037	1.65503
MedDCM-SEP2015HS-C610		30044	0	0.26471	0.07531	0.49369	0.85521	0.0867	3.89179	5.66585
MedDCM-SEP2015HS-C670		28668	0	0.07926	0.15786	1.10284	0.8443	0.23364	1.30081	1.31664
MedDCM-SEP2015HS-C676		28559	0.12196	0.15913	0.02641	3.73118	3.52048	2.1108	0.7209	1.19209
MedDCM-SEP2015HS-C71		81277	0.00476	0.0466	0.0232	0.53787	0.45816	0.18313	1.19963	1.26118
MedDCM-SEP2015HS-C783		26436	0	0.27219	0.17118	0.66442	0.7043	0.09853	4.11437	4.67537
MedDCM-SEP2015HS-C854		25374	0	0	0	2.04592	2.09859	1.01189	0	0.52502
MedDCM-SEP2015HS-C896		24636	0	0	0	2.1389	2.85675	1.43492	0	0.66092
MedDCM-SEP2015HS-C907		24412	0.06341	0.65158	0.89598	4.2371	4.37784	2.31694	14.2098	32.576
MedEnr-OCT2015-15m14h-C1040		23625	11.9414	6.74884	6.60852	0.04956	0	0.126	0	0
MedEnr-OCT2015-15m14h-C1048		23484	4.96016	3.40274	5.44381	0	0.07928	0.42783	0.01654	0.01576
MedEnr-OCT2015-15m14h-C1057		23361	6.65941	8.349	7.08677	0	0	0.223	0.01663	0
MedEnr-OCT2015-15m14h-C1095		22863	2.18352	5.38355	4.2886	0.1878	0.78179	1.09048	0	0.17804
MedEnr-OCT2015-15m14h-C1121		22539	5.47718	3.24296	3.88176	0	0	0.09906	0	0
MedEnr-OCT2015-15m14h-C1133		22428	5.45252	5.89323	3.02662	0	0	0.18251	0	0
MedEnr-OCT2015-15m14h-C1149		22254	1.02599	6.9604	5.81248	0.07016	0.2008	0.25082	0	0
MedEnr-OCT2015-15m14h-C1218		21450	5.52071	5.38507	4.25465	0.05459	0.57289	0.95413	0	0.10351
MedEnr-OCT2015-15m14h-C123		78500	19.7193	10.2182	10.468	0.41767	0.48859	1.17559	0.35134	0.40541
MedEnr-OCT2015-15m14h-C1266		20974	22.1412	12.8563	14.7438	0	0.12428	0.37257	0.01852	0.03529
MedEnr-OCT2015-15m14h-C1278		20885	4.02092	3.91686	3.80999	2.28009	2.72796	2.95766	0.186	0.58471
MedEnr-OCT2015-15m14h-C1334		20392	4.72542	2.80437	2.92195	0.40196	0.71217	0.80291	0.05715	0.2722
MedEnr-OCT2015-15m14h-C1376		20001	11.9381	9.75156	8.8618	0	0.01862	0.46512	0	0.0185
MedEnr-OCT2015-15m14h-C1381		19965	7.8503	4.09735	3.79667	1.95505	1.43616	2.01293	0.09728	0.53752
MedEnr-OCT2015-15m14h-C141		71571	20.7957	10.6677	9.54238	0.87804	0.69198	1.59616	0.06513	0.35676
MedEnr-OCT2015-15m14h-C146		70389	11.9194	6.30582	6.19875	0.28281	0.22748	0.42292	0.02759	0.06309
MedEnr-OCT2015-15m14h-C1508		18930	7.52312	3.64116	3.38668	2.10317	1.69172	1.94607	0.08208	0.31278
MedEnr-OCT2015-15m14h-C1588		18344	7.51029	3.34457	3.45375	1.61713	1.31947	2.10967	0.0847	0.48415
MedEnr-OCT2015-15m14h-C159		67134	21.7896	13.2513	14.8467	0.0814	0.06101	0.68177	0.03472	0.01102
MedEnr-OCT2015-15m14h-C1590		18340	5.90826	3.05619	3.06382	2.31981	2.59891	2.61737	0.04236	0.6255
MedEnr-OCT2015-15m14h-C1595		18304	20.0219	12.8489	13.6598	0.04265	0.14241	0.50824	0.06367	0.08087
MedEnr-OCT2015-15m14h-C1599		18276	5.0396	3.27412	3.4666	0.49122	0.99838	0.89587	0.10627	0.20248
MedEnr-OCT2015-15m14h-C16		247638	14.7115	5.553	4.99953	0.0268	0.00601	0.29903	0.03294	0.02241
MedEnr-OCT2015-15m14h-C1611		18195	5.12585	3.08055	2.86024	0.92245	1.14609	1.63611	0	0.18304
MedEnr-OCT2015-15m14h-C1636	Cyanophage	18000	2.90243	2.3144	2.99598	0.08674	0.10344	0.93028	0	0.45229
MedEnr-OCT2015-15m14h-C1694		17702	5.70583	3.35889	3.38728	0.35279	0.63107	1.84984	0.02194	0.22995
MedEnr-OCT2015-15m14h-C1705		17642	7.56784	8.62973	6.58383	0.02212	0	0.37966	0	0.0839
MedEnr-OCT2015-15m14h-C1719		17497	4.64469	2.64067	2.62949	0.06693	0.21282	0.25521	0.0222	0.1692
MedEnr-OCT2015-15m14h-C1882		16565	4.7892	4.2296	4.48487	0.04713	0.13488	0.2471	0.02345	0.06702
MedEnr-OCT2015-15m14h-C1911		16385	5.92827	2.68121	2.83097	1.71519	2.1363	2.04395	0.26079	0.70013
MedEnr-OCT2015-15m14h-C192		60810	14.7707	5.49926	5.07907	0.14763	0.06736	0.45894	0.00639	0.07303
MedEnr-OCT2015-15m14h-C1944		16240	13.7258	4.99053	5.17839	0.14421	0.11465	0.13748	0	0
MedEnr-OCT2015-15m14h-C1949		16232	5.10202	2.72981	3.11321	1.58708	1.28469	1.65057	0	0.47875
MedEnr-OCT2015-15m14h-C1993		16019	4.71086	3.14438	3.36648	1.07212	1.18554	1.53314	0.07275	0.20791
MedEnr-OCT2015-15m14h-C2004		15966	3.73272	3.01249	3.82644	0	0	0.06992	0	0
MedEnr-OCT2015-15m14h-C2050		15752	5.62601	2.66874	3.1602	0.07434	0.21276	0.47246	0	0.02349
MedEnr-OCT2015-15m14h-C2057		15733	5.92797	7.22152	4.8419	0.34733	0.82839	1.27719	0	0.07056
MedEnr-OCT2015-15m14h-C2103		15458	4.05567	2.7685	4.17175	0	0	0.16851	0	0
MedEnr-OCT2015-15m14h-C2151		15179	5.53245	3.41819	3.57763	0.8743	1.22661	1.34832	0.07677	0.31693
MedEnr-OCT2015-15m14h-C217		57710	6.94049	4.2328	4.65269	0.61548	0.98079	1.98598	0.04039	0.20519
MedEnr-OCT2015-15m14h-C2174		15075	6.67447	3.94422	3.37716	1.89013	1.45739	1.72789	0.0773	0.22093
MedEnr-OCT2015-15m14h-C2176		15072	11.8624	7.18644	7.68145	0	0	0.27158	0	0
MedEnr-OCT2015-15m14h-C2178		15067	5.47084	2.53871	3.57919	0.77718	0.93916	0.93849	0.05156	0.2456
MedEnr-OCT2015-15m14h-C2252		14817	3.91771	2.65822	2.82513	0.13172	0.25132	0.1758	0	0.0999
MedEnr-OCT2015-15m14h-C2270		14777	5.55201	2.79357	2.42445	1.58486	1.48678	1.78791	0.02629	0.3506
MedEnr-OCT2015-15m14h-C236		56139	4.21189	4.02743	2.86839	0.00695	0.04643	0.25851	0	0.00659
MedEnr-OCT2015-15m14h-C2408		14271	4.31165	2.57416	3.19747	0.73847	1.33075	1.25159	0.4083	0.77792
MedEnr-OCT2015-15m14h-C2423		14213	4.71044	2.77119	3.26359	0.38447	0.60259	1.3876	0.08199	0.18226
MedEnr-OCT2015-15m14h-C2459		14070	11.9645	5.97555	5.52139	0.13871	0.10586	0.39671	0	0.13151
MedEnr-OCT2015-15m14h-C2515		13870	21.9304	14.6082	13.5403	0.11257	0	0.59023	0	0.08004
MedEnr-OCT2015-15m14h-C2561		13688	5.73927	3.07115	2.58978	0	0.13602	0.13593	0.02838	0.13517
MedEnr-OCT2015-15m14h-C2562		13686	6.22081	3.84642	4.46389	0.02852	0.05442	0.27189	0	0.16223
MedEnr-OCT2015-15m14h-C2565		13682	4.29927	2.82338	2.70117	0.77027	0.76206	0.81592	0.02839	0.35161
MedEnr-OCT2015-15m14h-C261	Cyanophage	51378	8.91063	4.79132	5.21143	0.02279	0	0.21728	0	0.0072
MedEnr-OCT2015-15m14h-C2624		13487	15.4946	5.7284	4.72549	0.11576	0	0.38627	0	0.02744
MedEnr-OCT2015-15m14h-C2643		13458	2.76052	2.27941	2.69009	0	0	0.19355	0	0
MedEnr-OCT2015-15m14h-C2693		13332	6.38599	4.71554	4.15812	0.35133	0.86586	1.7305	0	0.36084
MedEnr-OCT2015-15m14h-C2698	SAR11	13312	3.25593	3.64154	4.36268	0.02932	0.02797	0.4752	0	0.11119
MedEnr-OCT2015-15m14h-C278		49489	21.254	10.5453	9.3119	0.78871	0.63957	1.48126	0.13344	0.25423
MedEnr-OCT2015-15m14h-C279	SAR11	49331	6.43272	3.83089	4.4033	0.00791	0	0.30927	0	0
MedEnr-OCT2015-15m14h-C2793		13055	4.44647	1.91463	2.36871	0.20929	0.28524	0.45605	0	0.05669
MedEnr-OCT2015-15m14h-C2815		12991	15.6691	5.74305	6.47348	0.06009	0.14332	0.4583	0	0.14243
MedEnr-OCT2015-15m14h-C292	Cyanophage	48304	8.54835	5.18248	5.58992	0.01616	0.03854	0.17718	0	0.0383
MedEnr-OCT2015-15m14h-C295		48005	20.2101	12.1888	13.0799	0.04066	0.04654	0.57361	0.00809	0.02312
MedEnr-OCT2015-15m14h-C30	Cyanophage	176246	12.2566	6.73224	6.57963	0.05758	0.02958	0.25969	0.01322	0.021
MedEnr-OCT2015-15m14h-C3002	SAR11	12471	5.0581	2.33834	3.14491	0.56338	0.41803	0.89515	0.09345	0.05935
MedEnr-OCT2015-15m14h-C3003		12470	13.0652	11.1156	8.55846	0	0.05972	0.17904	0	0
MedEnr-OCT2015-15m14h-C3025		12399	24.1889	12.4621	12.531	0.09444	0.30033	1.08041	0.06266	0.17907
MedEnr-OCT2015-15m14h-C304	Cyanophage	47008	5.96029	3.12592	3.33732	2.81484	2.83591	2.93681	0.06611	0.66126
MedEnr-OCT2015-15m14h-C31	Cyanophage	175282	15.4525	10.5785	6.39206	0.02672	0.02337	0.18045	0.01108	0.02322
MedEnr-OCT2015-15m14h-C3109		12139	3.25176	2.93267	2.36106	0	0	0	0	0
MedEnr-OCT2015-15m14h-C3170		11997	3.93539	2.96738	2.86052	0.03253	0.18624	0.27916	0	0.21592
MedEnr-OCT2015-15m14h-C3171		11989	9.48998	4.2961	3.42862	0.03256	0	0.06208	0	0
MedEnr-OCT2015-15m14h-C322		45607	12.3886	5.71315	6.03624	0.17973	0.1388	0.39164	0.02555	0.13794
MedEnr-OCT2015-15m14h-C3292		11710	3.50308	2.8784	3.28487	0	0	0.15889	0	0
MedEnr-OCT2015-15m14h-C3454		11339	6.72345	6.98056	5.55415	0.41308	1.24793	1.24705	0	0.32635
MedEnr-OCT2015-15m14h-C3486		11282	6.79172	3.08831	3.81061	1.03791	2.11239	1.61616	0.51647	0.59041
MedEnr-OCT2015-15m14h-C3496		11265	3.05745	3.02573	2.34338	0	0	0	0	0
MedEnr-OCT2015-15m14h-C3532		11177	3.774	2.47353	1.7545	0	0	0.26634	0	0
MedEnr-OCT2015-15m14h-C3549		11153	4.71898	1.83367	2.73885	0.73494	0.56759	1.13439	0	0.09954
MedEnr-OCT2015-15m14h-C3556		11145	5.48628	2.7185	2.91	1.75112	1.33647	1.30214	0.03486	0.29883
MedEnr-OCT2015-15m14h-C3559		11141	3.36937	2.71947	3.2157	0	0	0	0	0
MedEnr-OCT2015-15m14h-C358	Cyanophage	43122	12.5641	6.41125	5.74569	0.15388	0.16407	0.36243	0	0.06865
MedEnr-OCT2015-15m14h-C3624	SAR11	11033	7.22561	4.01616	4.58022	0.77832	0.81003	0.80945	0.70417	0.46957
MedEnr-OCT2015-15m14h-C3625		11030	25.507	12.8415	14.0179	0.10616	0.20256	1.1133	0.07043	0.0671
MedEnr-OCT2015-15m14h-C3660		10971	6.03185	3.38297	3.43739	2.2414	2.2741	2.27249	0.07082	0.74207
MedEnr-OCT2015-15m14h-C3669		10961	6.21389	3.45517	3.47494	0.10683	0.47562	0.95056	0.07088	0.03376
MedEnr-OCT2015-15m14h-C3761		10820	5.18611	3.57019	3.69449	1.08223	0.99805	1.82273	0.0718	0.20521
MedEnr-OCT2015-15m14h-C377		41795	6.85186	3.98701	4.34006	0.44827	0.73059	1.92311	0.03718	0.28333
MedEnr-OCT2015-15m14h-C3824		10710	5.34777	3.35933	3.41553	2.76981	1.84276	2.88379	0.03627	0.48373
MedEnr-OCT2015-15m14h-C3862		10629	3.38604	2.92173	4.6124	0	0	0.07002	0	0
MedEnr-OCT2015-15m14h-C395		41043	5.80821	3.54332	3.73965	1.1222	1.10688	1.39623	0.05679	0.32459
MedEnr-OCT2015-15m14h-C398		40918	5.3247	4.72035	4.93077	0	0	0.14551	0.01899	0.00904
MedEnr-OCT2015-15m14h-C4120		10233	4.65161	2.84975	3.27991	1.44946	1.09169	1.67274	0	0.36163
MedEnr-OCT2015-15m14h-C415		40129	5.99836	3.74672	3.9188	0.04863	0	0.22255	0	0.00922
MedEnr-OCT2015-15m14h-C4160		10188	11.7753	6.35661	7.73629	4.02278	4.6419	5.11344	0.15252	1.05335
MedEnr-OCT2015-15m14h-C4191		10145	26.664	14.2977	13.5308	0.1539	0.33035	0.77027	0.11487	0.18238
MedEnr-OCT2015-15m14h-C4233		10086	22.6378	12.654	11.404	0.1548	0.1846	1.36508	0.03852	0.11007
MedEnr-OCT2015-15m14h-C4257		10044	8.2068	4.67556	3.07881	0	0	0.0741	0	0
MedEnr-OCT2015-15m14h-C427		39460	22.4584	10.4038	9.01219	0.87047	0.87762	1.52768	0.07876	0.18756
MedEnr-OCT2015-15m14h-C473		37346	8.38311	7.31156	7.07864	0.04181	0	0.3587	0	0.01982
MedEnr-OCT2015-15m14h-C508		35753	7.90153	4.3536	4.25077	0	0	0.29142	0	0
MedEnr-OCT2015-15m14h-C51		128949	7.35273	4.28799	4.57398	0.47524	1.07714	2.27684	0.01205	0.28411
MedEnr-OCT2015-15m14h-C549	Cyanophage	34445	7.89823	3.43042	3.77719	2.11905	1.37296	2.03098	0.07894	0.38676
MedEnr-OCT2015-15m14h-C57	Sphingomonadaceae	116895	2.4399	3.89752	4.01974	0.01669	0.06053	0.6494	0.00997	0.10763
MedEnr-OCT2015-15m14h-C584		33014	1.16048	4.69185	3.82668	0	0	0.05636	0	0
MedEnr-OCT2015-15m14h-C602		32510	5.01148	2.94729	3.4336	1.35671	1.42032	1.56812	0.08364	0.35286
MedEnr-OCT2015-15m14h-C615		32133	6.17827	3.66545	3.84944	0.826	1.23998	1.60967	0.08462	0.44914
MedEnr-OCT2015-15m14h-C635		31644	1.56538	6.51068	5.01726	0.04934	0.07061	0.29398	0.01228	0.01169
MedEnr-OCT2015-15m14h-C679	SAR11	30606	6.48652	4.20718	4.41115	0	0	0.27964	0	0.02418
MedEnr-OCT2015-15m14h-C693		30232	5.24829	6.03808	10.4159	0	0	0.35695	0	0
MedEnr-OCT2015-15m14h-C754		28790	8.18609	4.06476	4.637	0.01356	0	0.29728	0	0
MedEnr-OCT2015-15m14h-C876		26132	6.05691	5.82602	2.87181	0	0.01425	0.12816	0	0
MedEnr-OCT2015-15m14h-C933		25083	7.08164	4.6504	5.14188	0.6847	0.8759	2.26979	0.06195	0.2213
MedEnr-OCT2015-15m14h-C953		24780	1.79596	7.47354	5.60044	0.34653	0.12022	0.33037	0.01568	0.05973
MedEnr-OCT2015-15m14h-C981		24400	1.12608	7.0622	5.64129	0.09598	0.1984	0.22876	0	0.01516
MedEnr-OCT2015-15m7h-C1045		24815	1.16963	6.86779	5.39498	0.07865	0.16507	0.25492	0	0.01491
MedEnr-OCT2015-15m7h-C1075		24339	4.03861	3.00312	2.81997	0.01604	0.38249	0.21404	0.01596	0.15204
MedEnr-OCT2015-15m7h-C1096	Cyanophage	24056	4.26308	2.70784	2.97856	0	0	0.07734	0	0
MedEnr-OCT2015-15m7h-C1141	Cyanophage	23552	21.3115	12.639	13.4822	0.03315	0.04743	0.63198	0.06598	0
MedEnr-OCT2015-15m7h-C1143		23529	6.08554	3.49281	2.91705	2.67084	2.21567	3.22627	0.09906	0.61338
MedEnr-OCT2015-15m7h-C1180		23031	20.2141	13.3032	15.5065	0.01695	0	0.6786	0	0
MedEnr-OCT2015-15m7h-C1206		22751	1.15667	3.46244	2.13828	0.29166	1.93136	4.90676	0.03415	0.63435
MedEnr-OCT2015-15m7h-C1219		22629	6.17366	3.99992	2.84975	0	0.01646	0.03289	0	0
MedEnr-OCT2015-15m7h-C1245		22380	1.6946	7.24273	5.57755	0.15697	0.03328	0.31591	0	0.03307
MedEnr-OCT2015-15m7h-C1292	Cyanophage	21881	4.72221	2.80393	2.15436	0	0	0.11904	0	0.01691
MedEnr-OCT2015-15m7h-C1300		21803	5.67982	3.59561	3.26905	2.41682	2.85221	3.12327	0	0.96744
MedEnr-OCT2015-15m7h-C1344		21373	4.14639	2.79969	2.85842	0.18263	0.29619	0.27857	0	0.31165
MedEnr-OCT2015-15m7h-C1420		20694	5.49799	2.96476	3.49891	0	0	0.14385	0	0
MedEnr-OCT2015-15m7h-C1456	Cyanophage	20442	1.96884	5.18744	3.81876	0.15275	0.69222	1.03759	0	0.16292
MedEnr-OCT2015-15m7h-C1487		20203	20.8982	13.197	13.6265	0.01932	0.07373	0.57098	0.05768	0.1099
MedEnr-OCT2015-15m7h-C1510		19964	3.66366	2.82655	2.66346	0.0391	0.29844	0.14911	0	0.18536
MedEnr-OCT2015-15m7h-C1526		19804	1.73915	2.84939	1.3901	0	0	0.05637	0	0
MedEnr-OCT2015-15m7h-C1541		19673	10.6421	5.27471	3.2396	0	0	0.20806	0.01975	0
MedEnr-OCT2015-15m7h-C1575		19401	16.3964	8.14012	11.138	4.02376	4.60647	6.5404	0.24027	1.4687
MedEnr-OCT2015-15m7h-C1609		19135	3.09431	3.12714	2.24674	0	0	0.01945	0	0
MedEnr-OCT2015-15m7h-C1623		19006	12.8481	9.04657	8.79	0.02053	0.03919	0.37199	0	0
MedEnr-OCT2015-15m7h-C1635		18925	5.23486	3.68214	3.44735	1.19624	1.06253	1.37637	0.02053	0.2933
MedEnr-OCT2015-15m7h-C167		64086	21.1231	13.0424	13.9581	0.08527	0.06391	0.68516	0.01212	0.03464
MedEnr-OCT2015-15m7h-C1747		18120	6.27899	6.22841	2.83046	0	0	0.14375	0	0
MedEnr-OCT2015-15m7h-C1793		17839	5.94403	2.82358	3.10758	0.13128	0.0835	0.14602	0	0
MedEnr-OCT2015-15m7h-C1797	SAR11	17818	1.23799	7.26919	5.6722	0.10953	0.20899	0.25061	0	0.02077
MedEnr-OCT2015-15m7h-C183		60705	6.90406	4.35461	4.64679	0.52082	0.86492	1.95542	0.0256	0.26212
MedEnr-OCT2015-15m7h-C1914		17170	4.46268	3.85999	2.67957	0.25006	0.30363	0.28174	0.02262	0.32329
MedEnr-OCT2015-15m7h-C1963		16895	6.41358	3.78833	3.12497	2.70305	2.71099	2.42275	0.06898	0.98564
MedEnr-OCT2015-15m7h-C2020		16650	7.57712	3.6621	3.26155	1.89887	1.7221	2.30196	0.09332	0.24448
MedEnr-OCT2015-15m7h-C208		57896	11.8979	6.58064	6.25966	0.209	0.19295	0.35993	0.02684	0.05113
MedEnr-OCT2015-15m7h-C2132		16124	4.92019	3.1239	1.68397	0.12104	0.04619	0.25386	0.07228	0.16066
MedEnr-OCT2015-15m7h-C2134		16116	7.56404	3.85394	3.41642	1.74382	1.64052	1.66245	0.12052	0.4822
MedEnr-OCT2015-15m7h-C2152		16046	5.42646	2.69065	3.07879	1.36222	1.32279	1.66971	0	0.39205
MedEnr-OCT2015-15m7h-C2173		15949	10.8461	8.6197	7.73196	0.02447	0	0.32664	0.02436	0
MedEnr-OCT2015-15m7h-C2236		15618	2.05662	6.78971	5.33633	0.07498	0.04769	0.23826	0	0.02369
MedEnr-OCT2015-15m7h-C2277		15484	6.0233	3.59545	3.55587	0.42854	0.62527	1.89853	0.02509	0.26289
MedEnr-OCT2015-15m7h-C2301		15398	6.15747	3.09902	3.0859	2.38281	2.53926	2.68246	0.02523	0.60082
MedEnr-OCT2015-15m7h-C2324		15339	24.548	13.8264	11.5798	1.04331	0.67974	2.32889	0.1013	0.41013
MedEnr-OCT2015-15m7h-C2355		15203	2.64731	3.1886	2.23248	0	0	0.02448	0	0
MedEnr-OCT2015-15m7h-C2359		15189	3.7708	3.017	4.07184	0.05139	0	0.1225	0	0
MedEnr-OCT2015-15m7h-C2420		14957	5.43345	2.68398	2.54655	0.60022	0.39834	0.59709	0.1818	0.02474
MedEnr-OCT2015-15m7h-C2421		14955	5.84821	2.83629	1.86604	0.0261	0.1245	0.09953	0	0.02475
MedEnr-OCT2015-15m7h-C2440		14897	6.10478	3.30494	2.93653	0.23581	0.19997	0.62448	0	0.04968
MedEnr-OCT2015-15m7h-C2488		14720	0.28919	2.23836	2.28012	0	0	0.05056	0	0
MedEnr-OCT2015-15m7h-C2518		14650	3.40763	3.46407	3.44939	2.13147	1.85553	2.03201	0.18561	0.50519
MedEnr-OCT2015-15m7h-C2534		14605	4.79599	5.21211	4.59615	0	0.07649	0.28026	0.0266	0.10135
MedEnr-OCT2015-15m7h-C2553	Cyanophage	14550	4.62793	2.1604	2.20308	0	0	0.05115	0	0
MedEnr-OCT2015-15m7h-C2566		14493	6.62208	2.79604	2.75819	0.13466	0.10278	0.17973	0.0268	0.10213
MedEnr-OCT2015-15m7h-C258		53294	7.88592	8.03717	7.09738	0	0	0.30024	0.00729	0.00694
MedEnr-OCT2015-15m7h-C2584		14448	5.83915	4.01054	4.48948	0.02701	0.05155	0.28331	0	0.17929
MedEnr-OCT2015-15m7h-C2617		14365	1.42781	7.67196	5.82805	0.51627	0.28515	0.23314	0	0.05152
MedEnr-OCT2015-15m7h-C262		53050	14.6188	5.39704	5.70829	0.10301	0.16144	0.36475	0.02197	0.07673
MedEnr-OCT2015-15m7h-C264		52626	14.2439	5.45491	5.19533	0.01483	0.01415	0.26869	0	0
MedEnr-OCT2015-15m7h-C2689		14120	5.45405	4.42556	5.52855	0.02764	0.02637	0.55342	0	0
MedEnr-OCT2015-15m7h-C2705		14088	11.8668	7.41957	7.81644	0	0	0.29055	0	0
MedEnr-OCT2015-15m7h-C2724		14051	0.44067	2.29103	2.4692	0	0	0	0	0
MedEnr-OCT2015-15m7h-C2741	SAR11	13980	3.57095	3.95516	4.18119	0.61425	0.66591	1.09132	0.58352	0.92646
MedEnr-OCT2015-15m7h-C2744		13974	14.6499	4.98673	6.234	0.19553	0.02665	0.39943	0	0.02648
MedEnr-OCT2015-15m7h-C276		51015	5.75005	3.28128	3.30434	3.14463	2.48178	2.80826	0.04569	0.69637
MedEnr-OCT2015-15m7h-C2762		13906	5.92759	2.8596	2.7119	1.51572	0.88368	1.41823	0	0.45239
MedEnr-OCT2015-15m7h-C2982		13315	6.83011	4.92067	3.22879	0	0.02797	0.08384	0	0
MedEnr-OCT2015-15m7h-C2990		13285	3.6995	2.48014	3.15092	0.617	1.20528	1.31647	0.32164	0.66852
MedEnr-OCT2015-15m7h-C3003		13251	4.03024	3.25818	3.13054	0.53021	0.53393	1.12327	0.08795	0.13963
MedEnr-OCT2015-15m7h-C3083		13064	11.3751	8.40699	8.16932	0	0	0.14242	0	0
MedEnr-OCT2015-15m7h-C3121		12985	11.6529	5.8332	5.8085	0.18036	0.2581	0.51583	0	0.0855
MedEnr-OCT2015-15m7h-C313	Cyanophage	47515	9.46403	5.20477	5.77005	0.01643	0	0.22711	0.00818	0.00779
MedEnr-OCT2015-15m7h-C318	Cyanophage	46963	9.10557	4.95144	5.42833	0.01662	0	0.15055	0	0.01576
MedEnr-OCT2015-15m7h-C3199		12778	6.32972	5.51276	2.92178	0.06109	0.32056	0.14561	0.0304	0.40544
MedEnr-OCT2015-15m7h-C3222		12699	9.81267	5.72599	3.38541	0.15368	1.17293	2.4028	0.03059	0.11656
MedEnr-OCT2015-15m7h-C3339		12430	1.08968	2.34606	1.36526	0	0	0.08981	0	0
MedEnr-OCT2015-15m7h-C3403		12261	2.1147	3.27415	1.29181	0	0	0	0	0
MedEnr-OCT2015-15m7h-C3461		12104	5.11554	2.56569	2.39904	1.64463	0.83065	1.7216	0	0.27516
MedEnr-OCT2015-15m7h-C3514		11993	5.67918	3.31574	4.21359	3.18951	2.79445	2.76145	0	0.67883
MedEnr-OCT2015-15m7h-C3706		11636	10.1105	2.83162	1.84734	0	0	0.06396	0	0
MedEnr-OCT2015-15m7h-C3743		11564	3.24612	2.12875	2.15234	0	0.0322	0.09654	0	0
MedEnr-OCT2015-15m7h-C3780		11477	3.03469	3.29982	3.15441	0	0	0.09727	0	0
MedEnr-OCT2015-15m7h-C3794		11446	3.55007	2.24996	1.58148	0.0682	0.03253	0.22757	0	0
MedEnr-OCT2015-15m7h-C3876		11300	12.3974	5.96568	5.37308	0.24179	0.19772	0.59275	0	0.03275
MedEnr-OCT2015-15m7h-C3919		11232	5.71942	3.94501	4.39835	0	0	0.09939	0	0
MedEnr-OCT2015-15m7h-C3936		11198	9.78018	4.39665	3.60345	0.03486	0	0.09969	0	0
MedEnr-OCT2015-15m7h-C3951		11177	6.64778	5.6925	3.03664	0	0	0.09988	0	0
MedEnr-OCT2015-15m7h-C3953		11172	5.50766	2.06784	1.68777	0.45419	0.83328	1.13246	0.13908	0.03312
MedEnr-OCT2015-15m7h-C4049		11008	2.98821	2.71793	2.91197	0	0.03383	0.10141	0	0
MedEnr-OCT2015-15m7h-C4050		11008	5.44909	3.16518	2.53512	0.67371	0.57507	1.08172	0.03529	0.10085
MedEnr-OCT2015-15m7h-C4147		10838	2.35665	1.92191	1.80938	0.03602	0	0.03433	0	0
MedEnr-OCT2015-15m7h-C417		39975	20.8041	10.2887	8.81118	0.83972	0.6148	1.45215	0.10689	0.26846
MedEnr-OCT2015-15m7h-C4204		10749	4.75233	2.71295	2.24537	0.14525	0.2425	0.13847	0.10842	0.65411
MedEnr-OCT2015-15m7h-C4240		10695	5.13817	2.51418	3.31453	1.38685	0.80081	1.80924	0.03632	0.55361
MedEnr-OCT2015-15m7h-C4324		10537	5.65594	2.73159	2.4337	1.6299	1.55495	1.94232	0.07373	0.14048
MedEnr-OCT2015-15m7h-C4334		10520	1.47145	2.628	1.03958	0	0	0	0	0
MedEnr-OCT2015-15m7h-C4387		10445	5.6687	3.33578	3.53829	1.86848	1.46169	2.10193	0.14876	0.496
MedEnr-OCT2015-15m7h-C4390		10441	4.37362	2.35771	2.67279	0.52337	1.49792	0.99791	0.29764	0.67341
MedEnr-OCT2015-15m7h-C44	SAR11	134317	18.9524	11.8057	13.2072	0.0959	0.09426	0.75632	0.04627	0.04684
MedEnr-OCT2015-15m7h-C4439		10376	3.54319	3.02947	1.92629	0.11285	0.53832	0.32277	0.33694	0.85595
MedEnr-OCT2015-15m7h-C4447		10365	0.8214	5.44422	5.60308	0	0.03593	0.35901	0	0
MedEnr-OCT2015-15m7h-C452		38605	12.5806	6.04305	5.86116	0.29321	0.25079	0.48195	0.01006	0.07669
MedEnr-OCT2015-15m7h-C4535		10241	21.426	13.2021	12.778	0	0	0.32702	0	0
MedEnr-OCT2015-15m7h-C4573		10194	5.01106	3.45507	2.58958	0.95724	0.58446	0.73006	0	0.21781
MedEnr-OCT2015-15m7h-C46	Sphingomonadaceae	130415	8.12469	4.36466	4.29701	0.01497	0.0257	0.2197	0.02681	0.01135
MedEnr-OCT2015-15m7h-C4651		10101	5.63188	3.4119	2.9121	1.62297	1.29028	1.58408	0.03846	0.47626
MedEnr-OCT2015-15m7h-C4654		10095	4.75353	2.77616	1.9052	0	0	0.33175	0.07696	0.18328
MedEnr-OCT2015-15m7h-C4713		10024	5.55933	2.2291	2.93446	1.51862	1.78312	1.52201	0.34877	0.62759
MedEnr-OCT2015-15m7h-C4727		10003	8.62731	4.16468	3.88314	1.75593	1.48906	1.86	0	0.36994
MedEnr-OCT2015-15m7h-C505		36551	6.49026	5.35686	2.67224	0.08543	0.4177	0.13235	0.17004	0.48597
MedEnr-OCT2015-15m7h-C51		118894	20.6948	12.1617	14.0387	0.04924	0.02193	0.61344	0.02287	0.0249
MedEnr-OCT2015-15m7h-C52		116794	2.44201	3.89765	3.99415	0.01671	0.06377	0.65314	0.00998	0.10773
MedEnr-OCT2015-15m7h-C62		104722	5.84614	3.50794	3.75597	1.05854	1.2801	1.55991	0.04451	0.36397
MedEnr-OCT2015-15m7h-C656		32272	6.67929	3.95478	4.62748	0	0.01154	0.1499	0	0
MedEnr-OCT2015-15m7h-C659		32214	5.59812	4.05596	5.72453	0	0.09248	0.32344	0.01206	0.01149
MedEnr-OCT2015-15m7h-C696	Cyanophage	31306	7.72597	3.52034	3.67407	2.1071	1.26084	2.04444	0.04963	0.36644
MedEnr-OCT2015-15m7h-C777		29688	4.13218	3.08712	2.79458	1.17013	1.40481	1.37875	0.44487	0.87253
MedEnr-OCT2015-15m7h-C788		29415	12.9194	6.38604	5.4872	0.11943	0.17723	0.30361	0	0.1258
MedEnr-OCT2015-15m7h-C793		29336	5.27667	6.11922	10.644	0	0	0.36785	0	0
MedEnr-OCT2015-15m7h-C803		29135	5.48575	3.45768	3.79252	0.88421	1.20142	1.32829	0.04	0.33024
MedEnr-OCT2015-15m7h-C860		27904	1.38687	4.601	3.77063	0	0	0.04001	0	0
MedEnr-OCT2015-15m7h-C883		27409	19.3714	12.1317	12.7545	0.08545	0.14945	0.71954	0	0.027
MedEnr-OCT2015-15m7h-C893		27219	1.23694	4.89767	3.11735	0	0	0.02734	0	0
MedEnr-OCT2015-15m7h-C915		26818	1.15442	3.00796	2.32024	0.21832	1.74955	4.45403	0.05794	0.67614
MedEnr-OCT2015-15m7h-C917		26812	4.31561	3.07926	2.50361	0.07279	0.16666	0.24981	0.01449	0.17942
MedEnr-OCT2015-15m7h-C943		26409	6.08131	3.97234	3.91268	0	0	0.23954	0	0
MedEnr-OCT2015-15m7h-C96		86406	22.0623	10.55	9.25705	0.71826	0.5818	1.55897	0.09441	0.26553
MedEnr-OCT2015-15m7h-C979	Cyanophage	25721	7.94414	5.18291	5.39555	0	0	0.17361	0	0
MedEnr-OCT2015-15m7h-C98		86034	7.23297	4.40199	4.51484	0.52174	0.99117	2.30965	0.02258	0.28818
MedEnr-OCT2015-15m7h-C993		25582	1.0438	4.6189	3.30209	0	0	0.01455	0	0
MedEnr-OCT2015-60m14h-C100		62113	0.34267	0.39023	0.23072	6.20241	9.94592	6.3803	0.60664	4.28958
MedEnr-OCT2015-60m14h-C1029		20609	0.13145	0.14701	0.10979	1.81819	2.63801	3.57505	0.69741	1.09531
MedEnr-OCT2015-60m14h-C11	Cyanophage	196757	0.0177	0.0308	0.023	7.41342	9.77321	4.27985	0.10464	2.26068
MedEnr-OCT2015-60m14h-C1105		19951	0	0	0	0.19564	1.56782	3.26398	0	1.33546
MedEnr-OCT2015-60m14h-C1158		19576	6.42481	3.521	2.98596	2.31292	2.52993	2.85129	0.01984	0.83175
MedEnr-OCT2015-60m14h-C1165		19510	4.8002	2.89233	2.97673	2.64084	2.6721	2.91815	0.05973	0.62592
MedEnr-OCT2015-60m14h-C1213		19135	0.04045	0.27709	0.31533	1.12191	2.5104	2.3725	0	0.32876
MedEnr-OCT2015-60m14h-C1218		19118	2.71246	1.66401	0.78903	1.42916	7.03147	2.84174	1.36136	3.77448
MedEnr-OCT2015-60m14h-C1219		19116	0.02024	0.57454	0.49319	4.14501	4.40243	2.27753	14.7936	31.4186
MedEnr-OCT2015-60m14h-C1304		18486	0.04187	0	0	5.67983	5.7208	3.32135	0.12608	1.68152
MedEnr-OCT2015-60m14h-C137		54824	0.73411	0.42829	0.46087	0.19935	0.89657	2.73532	0	0.243
MedEnr-OCT2015-60m14h-C1375		18090	0.44924	0.75367	0.66709	5.89047	6.60766	4.56655	0	0.42958
MedEnr-OCT2015-60m14h-C1379		18057	4.2006	2.2232	1.90052	9.46792	7.81583	7.50119	0.58084	1.96739
MedEnr-OCT2015-60m14h-C1416		17767	0.06534	0.83132	0.59432	5.05289	4.65286	2.72272	15.895	32.7002
MedEnr-OCT2015-60m14h-C1417		17755	3.20404	1.74909	1.65672	1.95657	2.49579	2.59881	0.43757	1.22969
MedEnr-OCT2015-60m14h-C1464		17455	14.4775	8.22315	8.9661	1.58768	2.62402	3.28303	0.44509	0.89042
MedEnr-OCT2015-60m14h-C1496	Cyanophage	17293	0.51471	0.219	0.34892	4.9431	7.70893	3.74415	0.78621	3.01727
MedEnr-OCT2015-60m14h-C159		51799	1.06835	2.98303	2.2642	0.2562	1.73252	4.85623	0.03	0.62867
MedEnr-OCT2015-60m14h-C1612		16704	0.67186	0.52147	0.27092	0.0701	0.86941	2.76233	0	0.13292
MedEnr-OCT2015-60m14h-C1627		16632	0	0.02277	0	3.80186	6.33612	3.40074	0	0.66748
MedEnr-OCT2015-60m14h-C165	Sphingomonadaceae	50995	3.48326	1.41106	1.70829	9.27686	7.46285	9.18697	0.58655	1.50213
MedEnr-OCT2015-60m14h-C1665		16429	4.71107	2.02857	1.49203	10.8575	6.93572	7.11201	0.68569	1.847
MedEnr-OCT2015-60m14h-C1721	Cyanophage	16108	0.07207	0.07053	0.04682	4.19209	5.36325	2.86454	0.16881	3.12437
MedEnr-OCT2015-60m14h-C1733		16062	0	0	0.04696	0.19441	1.04326	2.52523	0.12092	0.59902
MedEnr-OCT2015-60m14h-C174		49904	1.65175	0.94862	0.95972	7.97012	5.32029	5.24197	1.68914	2.53604
MedEnr-OCT2015-60m14h-C1746		16009	0.60433	0.61508	0.49469	5.36395	6.30357	5.04394	0	0.71658
MedEnr-OCT2015-60m14h-C1751		15991	13.8185	7.81551	8.79648	1.68422	1.93279	2.58298	0.36438	1.08764
MedEnr-OCT2015-60m14h-C1841	Cyanophage	15634	0.51982	0.31491	0.31358	5.76724	7.74096	3.64163	0.94418	3.33744
MedEnr-OCT2015-60m14h-C1915		15263	13.3367	7.54315	8.89484	4.16844	5.00144	5.36361	0.40721	1.2365
MedEnr-OCT2015-60m14h-C1929	SAR11	15199	4.12478	1.61964	1.93533	9.81012	7.25201	7.27136	0.7923	1.85039
MedEnr-OCT2015-60m14h-C1954	Cyanophage	15110	0.02561	0	0	8.03382	6.62932	5.5903	0.02571	1.34698
MedEnr-OCT2015-60m14h-C1968		15065	7.96331	4.52504	4.15542	2.09866	1.16174	2.29714	0.15471	0.44215
MedEnr-OCT2015-60m14h-C1974		15054	8.14907	3.3711	3.50713	1.76312	1.43469	2.02692	0.02581	0.41789
MedEnr-OCT2015-60m14h-C1987		14994	0.23229	0.10103	0.25151	0.41651	1.51493	2.08466	0.02591	0.69104
MedEnr-OCT2015-60m14h-C212		45583	0.31412	0.33233	0.19856	6.03687	10.6935	6.76746	0.64767	4.87906
MedEnr-OCT2015-60m14h-C2130		14471	1.84523	1.20387	1.32907	2.42756	3.21657	2.77715	0.26844	1.61104
MedEnr-OCT2015-60m14h-C214		45107	0.37749	0.35263	0.18393	6.33422	10.4183	7.06986	0.61144	4.38089
MedEnr-OCT2015-60m14h-C2157		14390	0	0	0.02621	0.02712	1.06097	3.4134	0	0.28288
MedEnr-OCT2015-60m14h-C2160		14367	0	0.02636	0.0525	2.52664	4.14701	2.87496	0.45965	3.91509
MedEnr-OCT2015-60m14h-C2203		14186	0.10912	0.18688	0.13292	2.14615	4.25242	3.35756	0.4929	3.3129
MedEnr-OCT2015-60m14h-C2215		14133	0.08215	0.10719	0.24015	3.45225	5.1642	3.73877	0.16491	4.34649
MedEnr-OCT2015-60m14h-C2221		14129	0	0.05361	0	6.60256	7.564	4.42458	0.10998	1.80718
MedEnr-OCT2015-60m14h-C2245		14059	2.72509	1.5624	1.55578	1.3604	2.27785	2.56739	0.66313	1.05286
MedEnr-OCT2015-60m14h-C2280		13932	6.30541	3.47949	3.6813	2.38139	2.43226	2.93801	0.13941	0.66404
MedEnr-OCT2015-60m14h-C2312		13832	3.02162	1.88922	2.45377	6.03886	5.73424	4.14295	0.05617	1.28416
MedEnr-OCT2015-60m14h-C234		43212	1.40603	0.96407	0.82035	4.10088	5.1963	3.58231	0.95289	2.69756
MedEnr-OCT2015-60m14h-C2434		13454	1.40944	0.90078	0.81287	4.1777	4.67753	2.87644	0.92393	2.668
MedEnr-OCT2015-60m14h-C2466		13359	1.5643	0.87883	0.64928	5.31769	5.07316	3.31472	1.22128	2.57617
MedEnr-OCT2015-60m14h-C2469		13352	5.24606	1.36149	1.92061	4.91121	4.04393	4.7378	2.26928	3.76927
MedEnr-OCT2015-60m14h-C2496		13258	0.87568	0.62844	0.36978	2.09029	3.37042	2.86284	0.3809	6.69882
MedEnr-OCT2015-60m14h-C2589		13012	14.3649	7.50921	9.4482	5.42951	4.34991	5.57654	0.17912	1.56417
MedEnr-OCT2015-60m14h-C2591		13009	1.04118	0.84426	0.95664	2.8504	3.12007	2.31694	0.17916	0.6827
MedEnr-OCT2015-60m14h-C2596		12993	3.21673	1.77803	1.5383	1.35185	2.66535	2.29116	0.44846	1.13924
MedEnr-OCT2015-60m14h-C2602		12981	2.08685	1.13782	1.22016	3.488	5.22089	3.00992	0.32917	1.14029
MedEnr-OCT2015-60m14h-C2641		12882	0.03004	0	0	1.7271	2.11019	2.16647	0.3317	0.66071
MedEnr-OCT2015-60m14h-C2685		12774	0.09088	0	0.08857	1.19169	2.88596	3.08783	1.18598	1.44846
MedEnr-OCT2015-60m14h-C2713		12697	0.33527	0	0	1.16818	1.64236	2.19803	0.5201	0.90349
MedEnr-OCT2015-60m14h-C2727		12670	1.06904	2.95922	1.99422	0.18484	2.05732	4.93409	0.03066	0.55494
MedEnr-OCT2015-60m14h-C2772		12573	0.3078	0.9639	0.74985	0.52776	1.30315	3.93629	0	0.82411
MedEnr-OCT2015-60m14h-C2822		12466	0	1.21521	0.54453	5.13503	6.33272	3.16412	3.92631	33.8409
MedEnr-OCT2015-60m14h-C2845		12417	1.71414	0.61001	0.75928	3.42638	4.79827	3.47629	1.00109	2.50338
MedEnr-OCT2015-60m14h-C286	SAR11	39760	0.44773	0.21908	0.4363	2.74876	2.36013	2.91064	0.20517	0.81903
MedEnr-OCT2015-60m14h-C2872		12356	2.47428	1.50188	1.67865	3.60125	5.06305	2.77067	0.15719	1.70711
MedEnr-OCT2015-60m14h-C2916		12258	0	0.0309	0.0923	2.16529	2.49101	3.03567	0.6338	1.53963
MedEnr-OCT2015-60m14h-C2930		12223	0	0.74362	0.70962	3.8959	4.29559	2.34416	13.2208	33.3027
MedEnr-OCT2015-60m14h-C302		38576	0.67214	1.66898	1.68146	1.16361	4.84583	8.72018	0.1007	2.13921
MedEnr-OCT2015-60m14h-C3031	SAR11	12000	2.83793	2.71416	1.82273	3.35029	5.70976	4.03122	0.32371	1.91195
MedEnr-OCT2015-60m14h-C3070		11931	0.55141	0.25394	0.28447	0	0.90511	2.24559	0	0.46524
MedEnr-OCT2015-60m14h-C3080		11904	0.42262	0.76355	0.79199	4.55772	4.12917	3.40728	2.93691	3.94799
MedEnr-OCT2015-60m14h-C3101		11863	0.81554	0.35117	0.44505	6.087	4.14344	4.26598	0.19647	0.77985
MedEnr-OCT2015-60m14h-C3138		11798	0.49202	0.70621	0.54339	4.56559	5.14471	3.84792	2.89744	5.14399
MedEnr-OCT2015-60m14h-C3157		11764	2.6317	1.51308	1.37844	2.68755	3.07042	2.02441	1.35385	2.89399
MedEnr-OCT2015-60m14h-C323		37019	0.15681	0.07161	0.07131	0.01054	1.77039	3.3674	0.02099	1.41948
MedEnr-OCT2015-60m14h-C3231		11596	0.03337	0.55521	0.48782	9.39122	8.25289	3.52987	10.2507	17.7751
MedEnr-OCT2015-60m14h-C3240		11580	0.73522	0.45787	0.06513	2.62913	3.08705	2.34579	0.10064	0.76695
MedEnr-OCT2015-60m14h-C3306		11464	0.27006	0.19821	0.36185	4.8348	6.95119	4.57675	0.47439	9.00602
MedEnr-OCT2015-60m14h-C3320		11449	2.33229	1.55471	1.31755	3.98882	3.31752	4.22522	0	0.7434
MedEnr-OCT2015-60m14h-C34		116181	0.21984	0.43029	0.32135	0.2083	2.03205	5.31996	0.06018	1.4588
MedEnr-OCT2015-60m14h-C3402		11318	15.2841	8.16468	8.7965	2.20717	2.10568	2.66311	0.24025	0.8174
MedEnr-OCT2015-60m14h-C3405		11312	13.6158	8.80512	8.53446	3.8301	4.64153	5.23036	0.3434	1.07954
MedEnr-OCT2015-60m14h-C3412		11291	16.3831	7.01024	9.21833	2.52358	2.44051	3.06496	0.20643	0.75381
MedEnr-OCT2015-60m14h-C3413		11290	0	0	0	1.79778	3.89197	2.439	0.89458	1.31109
MedEnr-OCT2015-60m14h-C3444		11227	2.34394	1.58545	1.10847	0.97347	1.82423	1.98867	0.173	0.62626
MedEnr-OCT2015-60m14h-C3486		11124	3.23536	1.83845	1.42385	2.28075	2.678	1.90673	1.3619	3.32662
MedEnr-OCT2015-60m14h-C3489		11117	0	0.03407	0	0.80754	2.14375	2.67779	0.55908	4.19419
MedEnr-OCT2015-60m14h-C3556		10992	2.95735	1.72271	2.33296	4.47424	4.84441	5.24722	0.74214	2.72693
MedEnr-OCT2015-60m14h-C3560	Cyanophage	10989	0.10565	0.27571	0.30886	1.70494	2.06706	2.23491	0.1414	1.27965
MedEnr-OCT2015-60m14h-C3638		10842	0.67818	0.48903	0.13913	0.072	0.41215	2.23089	0	0.20479
MedEnr-OCT2015-60m14h-C3681		10785	0.39471	0.56185	0.9441	6.84018	4.93739	3.38127	3.16959	4.87229
MedEnr-OCT2015-60m14h-C3727		10734	0.46868	0.31754	0.66753	2.25453	4.7527	3.25867	0	1.89612
MedEnr-OCT2015-60m14h-C3748		10711	4.73306	2.1922	2.14771	5.24757	3.99806	3.85627	1.70454	3.76583
MedEnr-OCT2015-60m14h-C3752		10704	5.0977	3.0074	4.05161	3.24541	2.74829	3.05922	0.10887	0.41486
MedEnr-OCT2015-60m14h-C3825		10592	5.18813	3.21798	3.38237	2.72696	1.65235	2.81052	0.1467	0.52406
MedEnr-OCT2015-60m14h-C3865	Cyanophage	10547	0	0	0.03575	7.40162	9.46209	3.81039	0.07366	1.99991
MedEnr-OCT2015-60m14h-C3885		10519	1.65554	1.40414	1.07553	1.07609	1.69921	1.80414	0.18464	0.84431
MedEnr-OCT2015-60m14h-C3932		10465	5.54693	3.3656	3.89188	3.05844	2.7043	2.9513	0	0.77795
MedEnr-OCT2015-60m14h-C3938		10461	0.55491	0.57925	0.5768	3.95511	5.30389	2.45443	0	0.91974
MedEnr-OCT2015-60m14h-C3948		10448	2.96318	1.48617	1.73254	2.91398	2.99383	2.38625	1.22694	3.32935
MedEnr-OCT2015-60m14h-C3974		10403	5.80319	3.27644	2.5738	2.73899	2.97099	3.14774	0	0.78258
MedEnr-OCT2015-60m14h-C4046		10302	0.26295	0.36762	0.03661	3.29628	3.72303	2.70903	0.18853	4.27455
MedEnr-OCT2015-60m14h-C4053		10291	0.15042	0.36801	0.14658	2.12401	3.58228	3.21815	0.98142	8.52228
MedEnr-OCT2015-60m14h-C406		33624	0	0	0	0.04643	1.39541	3.72953	0	0.72637
MedEnr-OCT2015-60m14h-C4071		10272	4.44557	1.73285	2.09265	1.97594	4.31393	3.29655	0.2269	1.26089
MedEnr-OCT2015-60m14h-C420		33230	0	0.05699	0.01135	0.21143	1.65849	2.79952	0	0.83521
MedEnr-OCT2015-60m14h-C423		33094	3.57827	1.97977	1.90302	1.93428	2.66674	2.93471	0.5869	1.40892
MedEnr-OCT2015-60m14h-C442		32268	3.56193	1.91308	2.40752	5.14094	4.11981	5.10865	1.11957	2.54593
MedEnr-OCT2015-60m14h-C444		32258	15.3318	9.04008	10.9074	2.31112	2.97827	2.95309	0.39739	1.06687
MedEnr-OCT2015-60m14h-C461		31366	0	0.26563	0.03607	2.84972	3.65656	2.90657	0.40869	4.17647
MedEnr-OCT2015-60m14h-C59		81922	3.34452	1.76596	2.39835	6.18444	6.09096	4.85569	0.22286	1.29642
MedEnr-OCT2015-60m14h-C612		27042	0.02862	0.02801	0	0.10104	1.65243	2.91723	0.0431	1.64213
MedEnr-OCT2015-60m14h-C64	SAR11	81114	1.93223	1.42871	1.13906	2.78618	4.74226	4.29851	0.22987	1.00367
MedEnr-OCT2015-60m14h-C654		26231	0.56062	0.64971	0.44568	5.5057	6.30303	5.22044	0.01481	0.60662
MedEnr-OCT2015-60m14h-C672		25817	6.23574	3.57934	3.21361	3.49246	2.36548	2.91152	0.03009	0.67369
MedEnr-OCT2015-60m14h-C696		25424	0.44142	0.67033	0.45983	2.18007	4.56975	3.82007	0.03056	1.03343
MedEnr-OCT2015-60m14h-C705	Cyanophage	25310	0.06116	0.04489	0.0447	8.00389	7.79767	5.29279	0.07674	1.54981
MedEnr-OCT2015-60m14h-C741		24790	3.74658	2.1388	2.8143	6.07766	5.58789	4.86343	0.1567	1.56739
MedEnr-OCT2015-60m14h-C760		24393	0.3173	0.43472	0.18552	1.18411	2.54937	3.17302	0.03185	1.03159
MedEnr-OCT2015-60m14h-C790		23803	2.25987	1.36831	1.14071	3.03365	5.06868	3.32983	0.24479	1.46137
MedEnr-OCT2015-60m14h-C866		22458	0.49972	0.67454	0.38622	0	1.07776	3.76122	0	0.21421
MedEnr-OCT2015-60m14h-C884		22196	0.03487	0	0	0	1.09049	3.87268	0	0.36679
MedEnr-OCT2015-60m14h-C946		21574	0.01794	0.05266	0.01748	1.08554	3.10687	2.34575	0.3241	4.83708
MedEnr-OCT2015-60m14h-C958		21397	0.77771	1.96467	1.79772	0.96683	4.89029	9.82584	0.07262	2.00618
MedEnr-OCT2015-60m14h-C960	Cyanophage	21382	0	0.01771	0.07055	7.30193	7.41895	4.45519	0.09084	1.45377
MedEnr-OCT2015-60m14h-C990		21040	0.34947	0.63	0.6811	2.15198	5.85819	4.31537	0.11078	1.24875
MedEnr-OCT2015-60m7h-C10	SAR11	142856	1.96399	1.47664	1.19849	2.83066	5.11686	4.60791	0.27736	1.11905
MedEnr-OCT2015-60m7h-C1030		20263	0.30558	0.44856	0.63278	1.98408	5.40287	3.8932	0.09586	1.24185
MedEnr-OCT2015-60m7h-C1047		20040	1.37107	0.77483	0.84682	1.65557	5.83463	3.43517	0.94982	3.12071
MedEnr-OCT2015-60m7h-C1116		19425	0.37852	0.19497	0.09707	1.58742	3.45059	2.52864	1.01988	2.70516
MedEnr-OCT2015-60m7h-C1136	Cyanophage	19261	0	0	0	3.97194	3.59596	1.71943	0	0.86457
MedEnr-OCT2015-60m7h-C1137		19255	0.20098	0.11801	0.05875	2.53392	4.00321	1.9712	0.02017	0.71109
MedEnr-OCT2015-60m7h-C1201		18742	0.20648	0.08083	0.04024	2.72823	3.35778	1.98545	0.53889	1.24391
MedEnr-OCT2015-60m7h-C1215		18578	2.47884	1.97739	2.2126	6.21897	6.65458	4.82716	0.20909	1.71303
MedEnr-OCT2015-60m7h-C1227		18477	0.12567	0.24596	0.18369	1.41537	2.9021	1.9535	0.06307	1.8025
MedEnr-OCT2015-60m7h-C1228		18463	0.18864	0.14359	0.06128	2.60033	3.44886	1.51159	1.03094	1.66357
MedEnr-OCT2015-60m7h-C1232		18392	14.8972	8.15427	10.7443	2.20714	3.32044	2.85276	0.35905	1.14686
MedEnr-OCT2015-60m7h-C1236	Cyanophage	18372	4.21283	2.22631	1.86793	9.32683	8.12773	7.57512	0.57089	1.9538
MedEnr-OCT2015-60m7h-C1238		18365	0.29501	0.16497	0.12321	0.85015	3.36588	0.99284	1.50179	4.91659
MedEnr-OCT2015-60m7h-C1239		18356	0.1265	0.06189	0.16435	2.74307	2.90094	1.92584	0.02116	0.46368
MedEnr-OCT2015-60m7h-C1247		18332	2.57544	1.59074	1.78972	2.87442	3.04693	1.96895	1.67401	2.72514
MedEnr-OCT2015-60m7h-C1265		18160	0.95895	0.29197	0.53993	2.29982	3.83449	2.31546	0.44921	2.22114
MedEnr-OCT2015-60m7h-C1267		18155	2.25949	1.50195	1.22555	3.18193	5.53795	3.38191	0.23536	1.52873
MedEnr-OCT2015-60m7h-C1283	SAR11	18015	3.39409	1.99714	2.36548	4.745	4.21674	5.12261	0.9272	2.30064
MedEnr-OCT2015-60m7h-C1318	Cyanophage	17777	0	0.04261	0	4.89635	3.58194	1.80017	0.19666	0.74939
MedEnr-OCT2015-60m7h-C1341		17643	0	0.66544	0.513	4.44682	4.62224	2.44658	15.1481	31.0004
MedEnr-OCT2015-60m7h-C1372		17435	0	0	0	0.44775	3.67356	0.87506	0	1.71921
MedEnr-OCT2015-60m7h-C1413	SAR11	17139	4.22238	1.74566	1.95831	9.51956	7.49575	7.38189	0.63462	2.05117
MedEnr-OCT2015-60m7h-C142		52390	0.47275	0.3253	0.21595	5.99009	10.683	6.85414	0.64508	4.83846
MedEnr-OCT2015-60m7h-C1441		16970	3.67151	1.94158	2.33337	5.2902	4.03754	5.153	1.32766	2.44231
MedEnr-OCT2015-60m7h-C1469		16818	1.03547	0.99082	0.51574	1.97274	6.46532	3.03124	1.10868	4.88476
MedEnr-OCT2015-60m7h-C1475		16795	0	0.49609	0.8308	2.62618	3.3036	0.709	18.1102	18.3319
MedEnr-OCT2015-60m7h-C1480		16765	4.91674	2.14605	2.24943	4.44688	3.99807	4.03963	2.06218	3.99521
MedEnr-OCT2015-60m7h-C155		50855	0.00761	0.20852	0.06674	2.91659	4.0053	2.88295	0.45067	4.18407
MedEnr-OCT2015-60m7h-C1560		16263	0.16657	0	0	2.49608	2.95373	1.21269	0.64492	2.32094
MedEnr-OCT2015-60m7h-C159		50646	1.45945	0.86743	0.80418	7.78399	5.76438	5.23129	1.78711	2.4039
MedEnr-OCT2015-60m7h-C1637		15805	0.14691	0.04792	0.02386	2.76598	3.74614	1.85997	0.7865	2.03699
MedEnr-OCT2015-60m7h-C1675	Cyanophage	15633	0.42083	0.38761	0.07237	2.47183	3.31096	1.85664	0.17394	1.30192
MedEnr-OCT2015-60m7h-C168		49049	0.11835	0.1467	0.08458	3.30251	3.94779	2.09389	0.6811	1.19204
MedEnr-OCT2015-60m7h-C1755		15165	0.10208	0	0.02487	2.52238	3.2167	1.1778	0.07684	0.58564
MedEnr-OCT2015-60m7h-C1775		15061	0.0257	0.05029	0	2.66938	2.96694	2.05068	0.87693	1.05653
MedEnr-OCT2015-60m7h-C1808		14862	0.05208	0.22934	0.07612	2.23238	3.55789	2.27844	3.21491	3.08752
MedEnr-OCT2015-60m7h-C1813		14831	0.41749	0.58732	0.58484	4.36881	5.14713	3.38718	2.75017	4.84057
MedEnr-OCT2015-60m7h-C1835		14755	4.85214	1.92504	1.61019	11.3486	7.04119	7.31363	0.78981	1.78067
MedEnr-OCT2015-60m7h-C1905	Cyanophage	14464	0.45484	0.47131	0.13037	2.15887	3.14089	2.08387	0.13429	1.04896
MedEnr-OCT2015-60m7h-C1935		14334	0.18899	0.07926	0.18416	2.88645	5.01385	3.11521	0.1355	3.87248
MedEnr-OCT2015-60m7h-C1958		14279	0.18971	0.23871	0.02641	0.98408	3.10335	0.9121	1.44184	4.61304
MedEnr-OCT2015-60m7h-C1979	Archaea	14196	0	0.29346	0.29222	1.01733	3.06903	0.86501	9.41311	23.9039
MedEnr-OCT2015-60m7h-C1986		14136	0	0.08037	0.08003	2.62315	3.31914	0.76339	10.25	17.7488
MedEnr-OCT2015-60m7h-C1989		14124	0.2192	0.10726	0.0534	1.65813	3.03195	1.52808	0	0.73361
MedEnr-OCT2015-60m7h-C2016		14023	0	0	0.02689	4.59271	3.58488	2.09633	0	0.68612
MedEnr-OCT2015-60m7h-C207		45031	0.10313	0.14297	0.16749	4.25594	6.77257	6.17281	4.29594	5.37441
MedEnr-OCT2015-60m7h-C2126		13631	0	0.63903	0.71932	2.37671	3.85188	0.87357	19.5211	18.3792
MedEnr-OCT2015-60m7h-C2144		13560	1.85504	0.89373	1.19587	3.36785	4.53112	3.12838	0.08594	1.14619
MedEnr-OCT2015-60m7h-C2203		13362	0.37651	0.56686	0.84669	6.74787	4.82121	3.31398	3.16881	4.73576
MedEnr-OCT2015-60m7h-C2232		13280	0.05828	0.08555	0.05679	0.91115	3.00032	0.36427	0.26326	1.81126
MedEnr-OCT2015-60m7h-C2242		13242	0.26302	0.143	0.31327	3.38977	5.31483	2.52908	0.61604	5.8406
MedEnr-OCT2015-60m7h-C2269		13173	0.05876	0.0575	0.05726	1.86673	3.30737	0.73445	9.99668	16.0966
MedEnr-OCT2015-60m7h-C2288		13123	15.3935	8.2249	9.42576	4.81846	5.07927	6.06813	0.26641	1.52274
MedEnr-OCT2015-60m7h-C2307	Cyanophage	13062	0	0	0	4.21343	3.67757	1.99417	0.02974	1.0199
MedEnr-OCT2015-60m7h-C2334		12972	0.02983	0.05839	0.08722	2.55763	4.2198	2.83989	0.23956	1.71163
MedEnr-OCT2015-60m7h-C2338	Archaea	12961	0.05972	0.1461	0.02909	1.47565	4.48195	1.57906	1.82824	10.1928
MedEnr-OCT2015-60m7h-C2349		12937	1.79481	0.9075	1.25346	3.74123	4.6054	3.25027	1.38123	2.80322
MedEnr-OCT2015-60m7h-C2383		12829	2.05124	1.32843	1.3522	2.82954	4.99249	2.32044	0.12112	1.24034
MedEnr-OCT2015-60m7h-C2404		12760	0	0.08904	0.08866	2.87543	4.20236	1.37064	2.10058	3.79914
MedEnr-OCT2015-60m7h-C2426		12694	1.12799	1.10388	0.7427	1.87567	7.01101	2.72621	0.91804	3.64398
MedEnr-OCT2015-60m7h-C2434		12670	0.15272	0.17935	0.11906	1.87923	2.82147	1.14541	1.07308	2.30736
MedEnr-OCT2015-60m7h-C2453	SAR11	12610	13.626	6.72747	9.21109	4.2716	5.22684	5.25266	0.27725	1.26188
MedEnr-OCT2015-60m7h-C2466		12569	2.67867	1.59696	1.32016	2.63964	2.9034	2.81253	1.69982	2.94418
MedEnr-OCT2015-60m7h-C2479		12530	0	0	0	1.65101	3.92287	2.6134	0.93006	1.35854
MedEnr-OCT2015-60m7h-C2515		12455	2.92069	1.48995	1.69559	2.6638	2.84028	2.09136	1.18517	3.11968
MedEnr-OCT2015-60m7h-C2532		12410	2.43233	2.07518	1.48902	2.04441	2.61053	2.75861	0.46953	1.07349
MedEnr-OCT2015-60m7h-C2565		12315	0.1257	0	0.03062	1.99679	2.57019	1.118	0.69395	1.5926
MedEnr-OCT2015-60m7h-C2598		12227	0.09495	0.03098	0.15421	2.64963	2.86279	1.55212	0.03177	0.33292
MedEnr-OCT2015-60m7h-C2625		12169	0.66783	0.40458	0.58881	1.98867	3.70264	2.20167	0.60651	1.67252
MedEnr-OCT2015-60m7h-C2661		12086	0.12808	0.15668	0.06241	1.74396	3.75888	0.86208	1.18921	2.38823
MedEnr-OCT2015-60m7h-C2689		12026	0.03218	0.03149	0.06272	1.9474	4.21113	1.88748	1.03364	3.13866
MedEnr-OCT2015-60m7h-C2706		11959	2.6535	2.09011	0.91449	1.40346	7.13053	3.01822	1.20184	4.30115
MedEnr-OCT2015-60m7h-C2713		11935	0.55122	0.53944	0.22118	2.58363	1.99682	2.08894	0	0.58911
MedEnr-OCT2015-60m7h-C2714		11930	0	0.06349	0.03161	3.14092	3.05891	1.87148	0.45586	0.86852
MedEnr-OCT2015-60m7h-C2719		11916	2.01355	1.39843	1.29756	3.73422	3.28126	3.80981	0	0.80744
MedEnr-OCT2015-60m7h-C2730		11878	15.9644	7.68409	9.5565	4.40339	5.51761	5.60769	0.16352	1.52657
MedEnr-OCT2015-60m7h-C2731		11876	0.03258	0	0.06351	2.69507	3.01011	1.66066	0	0.52972
MedEnr-OCT2015-60m7h-C2737	Cyanophage	11865	0	0.03192	0	4.73719	11.1415	7.49556	0	1.90251
MedEnr-OCT2015-60m7h-C277		39309	1.57517	0.8093	0.9018	4.23003	4.67021	3.87173	0.7708	2.94657
MedEnr-OCT2015-60m7h-C2833		11654	0	0.16249	0.06472	3.95215	7.41301	6.35407	4.5332	6.03314
MedEnr-OCT2015-60m7h-C2841		11643	0	0	0	3.95588	4.22173	2.20525	0	1.81165
MedEnr-OCT2015-60m7h-C2846		11624	2.39705	1.82453	1.5897	3.76087	5.44596	3.13722	0.16709	1.87829
MedEnr-OCT2015-60m7h-C2855		11610	0.03333	0.06524	0.03248	1.14307	4.10543	1.05768	1.70639	9.56211
MedEnr-OCT2015-60m7h-C2899		11526	0	0.09857	0	2.2012	3.61843	3.93872	0.90997	1.38056
MedEnr-OCT2015-60m7h-C290		38548	4.25662	2.073	1.90769	9.45738	7.303	8.00252	0.87672	2.04476
MedEnr-OCT2015-60m7h-C2905		11515	0	0	0	0.27118	5.20647	3.03765	0.03373	8.03417
MedEnr-OCT2015-60m7h-C293		38473	2.96734	1.9786	1.97022	5.57998	5.89444	4.44914	0.10097	1.35621
MedEnr-OCT2015-60m7h-C2990		11333	0.10244	0	0.09983	2.68643	4.2715	1.51038	0.95974	1.82855
MedEnr-OCT2015-60m7h-C2995		11321	0.34183	0.40144	0.16656	2.75823	3.78263	1.54485	0.24019	1.40556
MedEnr-OCT2015-60m7h-C3015		11282	0	0	0.03343	1.00332	2.57448	0.69264	0.58534	1.44322
MedEnr-OCT2015-60m7h-C3026		11260	0	0.03363	0.03349	2.18388	3.47242	1.1897	1.44895	2.9578
MedEnr-OCT2015-60m7h-C3031		11248	3.99101	2.0202	2.38045	4.61532	4.89968	4.56539	0.86339	2.79646
MedEnr-OCT2015-60m7h-C3051		11210	3.41767	2.22975	1.24472	1.94988	3.91975	2.32363	0	0.79227
MedEnr-OCT2015-60m7h-C307		37432	0.33083	0.27317	0.23172	6.11055	10.4355	7.55518	0.56039	4.51792
MedEnr-OCT2015-60m7h-C3093		11145	3.43761	1.97091	1.55651	2.90686	3.07389	2.43734	1.60331	3.51958
MedEnr-OCT2015-60m7h-C3138	Cyanophage	11047	0	0	0	3.88664	3.40454	1.34738	0.03516	0.87095
MedEnr-OCT2015-60m7h-C3148		11024	0.91271	0.20613	0.4105	2.26604	3.0063	2.09279	0.66951	2.24906
MedEnr-OCT2015-60m7h-C3164		10988	0.28176	0.44807	0.1716	1.98928	2.8467	1.32075	0.35353	0.97666
MedEnr-OCT2015-60m7h-C319	Cyanophage	37047	0.05223	0.11245	0.06108	4.62527	3.70898	1.97873	0.03146	0.75915
MedEnr-OCT2015-60m7h-C3267		10780	0.2154	0.6675	0.55973	6.19161	6.04506	3.52092	3.92779	5.25215
MedEnr-OCT2015-60m7h-C3298		10719	0.0722	0.21199	0.28146	5.17083	4.09929	2.67307	0.68856	0.86308
MedEnr-OCT2015-60m7h-C3363		10602	1.35056	0.71443	0.9604	3.09255	4.21478	3.29924	1.06255	3.10647
MedEnr-OCT2015-60m7h-C3371		10589	0.14619	0.03577	0.10684	1.8062	4.18479	1.22995	1.32065	3.18018
MedEnr-OCT2015-60m7h-C3411		10538	0.07345	0.07188	0.03578	1.59271	3.81634	1.62433	1.17959	3.16045
MedEnr-OCT2015-60m7h-C3412		10537	1.13853	0.71884	0.75159	5.70466	11.9095	13.3843	1.43777	4.07386
MedEnr-OCT2015-60m7h-C3413		10535	0.14694	0.1438	0	2.33417	4.0295	1.90736	1.29055	1.6158
MedEnr-OCT2015-60m7h-C3420		10525	0.80891	0.79162	0.8241	5.04363	4.70556	3.95977	0.18454	0.73835
MedEnr-OCT2015-60m7h-C3471		10426	0.11135	0.10897	0.07234	2.05907	2.71442	3.06941	0.63339	0.78085
MedEnr-OCT2015-60m7h-C3487		10408	0.11155	0.03639	0	1.46259	2.89801	0.7508	0.70913	1.81329
MedEnr-OCT2015-60m7h-C3543		10313	0	0.11017	0	1.02189	3.4302	0.82988	0.64033	3.04999
MedEnr-OCT2015-60m7h-C3569		10272	0	0	0	3.83789	2.75511	1.63016	0	0.64846
MedEnr-OCT2015-60m7h-C3574		10268	1.13067	0.55325	0.88146	3.42123	3.5903	3.55152	2.76171	4.2887
MedEnr-OCT2015-60m7h-C358	Cyanophage	34248	0	0.02212	0	4.59299	3.99036	1.84709	0.02269	0.82119
MedEnr-OCT2015-60m7h-C3590		10249	0	0.18476	0	3.54183	3.08829	1.92428	0.60643	0.79434
MedEnr-OCT2015-60m7h-C3619		10203	2.50332	1.37338	0.88707	1.645	5.18253	2.0059	0.68531	3.30049
MedEnr-OCT2015-60m7h-C3638		10168	1.17985	0.63319	0.81595	0.49904	3.58899	1.35407	0.64946	1.34658
MedEnr-OCT2015-60m7h-C3645		10159	0.11428	0.03728	0	2.26687	3.59217	1.97796	0.03824	0.07285
MedEnr-OCT2015-60m7h-C3656		10145	0.15258	0.11199	0	3.27034	3.19336	2.23744	0.68922	1.27668
MedEnr-OCT2015-60m7h-C3663		10134	0.45825	0.22423	0.14885	1.6562	4.81362	1.21173	2.37658	10.9913
MedEnr-OCT2015-60m7h-C3712		10053	0.30796	0.11302	0.07503	2.79552	3.4078	2.44299	0.11592	1.17793
MedEnr-OCT2015-60m7h-C3728	Cyanophage	10028	0	0.15106	0	4.12589	3.37916	1.48429	0.03874	1.14396
MedEnr-OCT2015-60m7h-C394		32416	14.5408	7.6875	9.7141	4.79236	5.26123	5.98071	0.33554	1.24432
MedEnr-OCT2015-60m7h-C41	SAR11	91016	0.49322	0.33704	0.30247	4.66163	7.71623	4.3092	0.12377	1.32952
MedEnr-OCT2015-60m7h-C422		31653	0.07336	0.81361	0.72676	4.78457	4.25868	2.40998	16.1258	31.6591
MedEnr-OCT2015-60m7h-C43	Cyanophage	88926	0.01741	0.08092	0	5.67539	3.71011	2.28475	0.05242	0.95711
MedEnr-OCT2015-60m7h-C449		30926	0.32535	0.44086	0.12194	5.96985	10.5839	6.18463	0.59036	4.21196
MedEnr-OCT2015-60m7h-C45		85355	0.04987	0.73654	0.75993	4.21169	4.51972	2.05336	14.9366	33.9207
MedEnr-OCT2015-60m7h-C452		30825	13.835	8.10886	9.10218	4.26729	4.6026	5.09429	0.37806	1.34456
MedEnr-OCT2015-60m7h-C474		30172	0.7824	0.6025	0.62495	1.87581	3.41867	1.99795	0.02575	0.88307
MedEnr-OCT2015-60m7h-C49		84195	3.00602	1.9162	2.26194	5.98502	6.24496	4.84394	0.17994	1.62622
MedEnr-OCT2015-60m7h-C548		27540	1.82676	0.96262	0.82161	3.81254	4.47554	3.36441	0.98736	2.75458
MedEnr-OCT2015-60m7h-C564		27309	0.0992	0.08321	0.02762	2.07247	3.7089	1.47161	1.50779	3.17084
MedEnr-OCT2015-60m7h-C583		26698	0.24642	0.25534	0.24013	1.1696	3.40324	0.90596	1.164	5.07303
MedEnr-OCT2015-60m7h-C587		26690	1.13096	0.59596	0.64996	1.33082	6.47367	2.98359	0.58217	3.59101
MedEnr-OCT2015-60m7h-C617		26272	0.13257	0.11532	0.01435	2.80798	3.99703	1.69966	0.63579	1.5494
MedEnr-OCT2015-60m7h-C619		26139	1.55454	0.82586	0.90892	3.86756	4.70117	3.75828	0.77278	2.88806
MedEnr-OCT2015-60m7h-C621		26027	0	0.72755	0.70998	2.9094	3.7199	0.97221	18.1937	18.4124
MedEnr-OCT2015-60m7h-C623		26021	0.05949	0.11643	0.05797	3.25508	3.34868	2.04497	0.64193	1.12349
MedEnr-OCT2015-60m7h-C70	SAR11	76930	3.45088	1.99871	2.50006	6.09359	6.32647	4.97246	0.27772	1.67397
MedEnr-OCT2015-60m7h-C73		74866	1.58692	0.92573	0.72032	8.1385	5.46134	5.20399	1.80566	2.68893
MedEnr-OCT2015-60m7h-C754		23655	0.01636	0.09606	0.01594	2.3596	3.13265	0.69216	1.42869	3.50421
MedEnr-OCT2015-60m7h-C765		23496	0.42823	0.67698	0.36916	2.22606	4.34248	3.57922	0.03307	1.10248
MedEnr-OCT2015-60m7h-C767		23432	0.01652	1.21219	0.45064	3.99786	4.30667	2.66793	3.43164	27.3213
MedEnr-OCT2015-60m7h-C770		23366	0.89436	0.55108	0.50032	1.92105	3.72917	2.03845	0.71487	2.43894
MedEnr-OCT2015-60m7h-C808		22993	0.38711	0.39531	0.11481	1.34109	4.64802	1.76402	2.17939	10.4451
MedEnr-OCT2015-60m7h-C821		22831	0.08475	0.04976	0.09911	3.00894	3.32726	1.92323	0.76565	0.98871
MedEnr-OCT2015-60m7h-C826		22775	0	0.03326	0	0.46273	5.26476	3.85592	0.03411	8.54658
MedEnr-OCT2015-60m7h-C84		70841	3.51258	1.73747	2.43281	6.35288	6.36036	4.87983	0.23031	1.24325
MedEnr-OCT2015-60m7h-C859		22370	0.58818	0.59255	0.37088	3.6642	6.04257	2.87776	0	0.72787
MedEnr-OCT2015-60m7h-C927		21425	0.75863	1.94442	1.74257	1.03844	4.76224	9.20512	0.07252	1.89993
MedEnr-OCT2015-60m7h-C99		61128	0.39884	0.32217	0.2406	6.5003	10.7032	7.14055	0.67996	4.55847
MedEnr-OCT2015-60m7h-C995		20580	14.0844	7.41615	8.94232	3.60358	4.39686	5.58711	0.35863	0.98897
MedEnr-OCT2015-90m7h-C1002		18548	0	0.14293	0.08133	0.39984	0.78298	0.44137	0.79584	4.60871
MedEnr-OCT2015-90m7h-C1009		18491	0	0.18433	0.14276	1.6676	2.13465	0.64397	3.7814	4.08258
MedEnr-OCT2015-90m7h-C101	Cyanophage	53435	0	0.19845	0.18349	0.27758	0.79444	0.08357	4.70348	9.21066
MedEnr-OCT2015-90m7h-C1017		18429	0	0	0.02046	0.23298	0.54556	0.18172	0.50589	4.93967
MedEnr-OCT2015-90m7h-C1031		18334	0	0	0.04114	0.10645	1.01553	0.24356	0.36019	3.5322
MedEnr-OCT2015-90m7h-C1032	Archaea	18330	0	0	0.08229	0	0.12189	0	2.4795	4.05787
MedEnr-OCT2015-90m7h-C1033		18325	0.10559	0.248	0.08232	1.27801	3.12938	1.31991	0.74193	2.62521
MedEnr-OCT2015-90m7h-C1036	Actinobacteria	18301	0	0.22763	0.18546	0.49054	0.87493	0.183	3.12021	11.6065
MedEnr-OCT2015-90m7h-C1039		18266	0	0.0622	0.08258	0.55559	1.26395	0.38706	0.97826	3.62639
MedEnr-OCT2015-90m7h-C1040		18266	0.02119	0.08294	0.20646	1.02571	1.14163	0.30558	5.89084	10.9399
MedEnr-OCT2015-90m7h-C107		51740	0	0.16103	0.04373	0.61106	0.74849	0.07192	4.90261	5.593
MedEnr-OCT2015-90m7h-C1072		17959	0	0.12653	0.20999	1.93434	2.05274	0.68376	4.82351	4.30655
MedEnr-OCT2015-90m7h-C109		50959	0.44805	0.28984	0.21461	5.62979	10.4715	6.73262	0.6327	4.85814
MedEnr-OCT2015-90m7h-C1105		17692	1.04994	1.54126	0.91657	1.76498	7.40879	3.68074	0.90022	4.60162
MedEnr-OCT2015-90m7h-C1111		17663	1.02976	0	0	2.34244	1.60225	0.33708	2.92501	4.35776
MedEnr-OCT2015-90m7h-C1136		17520	2.78315	1.77255	0.9471	1.42584	6.84389	2.71863	1.26381	3.61182
MedEnr-OCT2015-90m7h-C1146		17439	0.15534	0.08687	0.23787	2.37252	2.34883	1.47232	5.21237	4.81692
MedEnr-OCT2015-90m7h-C1151		17415	0	0	0	0.06724	0.40627	0.21367	0.22306	3.7186
MedEnr-OCT2015-90m7h-C116	Archaea	48057	0	0	0	0.00812	0.33319	0.04646	0.07275	5.49802
MedEnr-OCT2015-90m7h-C1160		17373	0	0	0	0.02247	0.55729	0.06426	0.29068	3.40808
MedEnr-OCT2015-90m7h-C117	Cyanophage	47847	0	0.04749	0.4335	0	0.21013	0.02333	4.10806	14.0606
MedEnr-OCT2015-90m7h-C1187		17159	0	0.08828	0.08791	0.52319	0.86806	0	13.6737	11.6457
MedEnr-OCT2015-90m7h-C1188		17158	0	0	0.17583	0	0.15192	0.04337	0.81504	4.24878
MedEnr-OCT2015-90m7h-C1197		17131	1.17468	0.77376	0.79249	6.44807	11.6945	13.3588	1.29251	3.99626
MedEnr-OCT2015-90m7h-C1199		17121	0.27124	0.08848	0.17621	3.21452	5.04592	3.45575	0.2042	4.12828
MedEnr-OCT2015-90m7h-C1203		17113	0.11307	0.59753	0.48481	2.48615	2.91581	0.5871	16.9792	16.5425
MedEnr-OCT2015-90m7h-C1204	Archaea	17110	0	0.15494	0	0.57032	0.4788	0.10874	1.54383	4.23907
MedEnr-OCT2015-90m7h-C1208		17084	0	0	0.02207	0.13709	0.45773	0.10891	0.36381	3.53072
MedEnr-OCT2015-90m7h-C1210		17080	0	0.02217	0.13248	1.32546	0.91568	0.56645	0.90973	6.91142
MedEnr-OCT2015-90m7h-C1213		17074	0	0.02218	0.02209	0.48008	1.17771	0.17435	1.84285	4.05295
MedEnr-OCT2015-90m7h-C1215		17057	0.3857	0.19983	0.15476	0.96111	3.38384	1.00353	1.34366	5.29361
MedEnr-OCT2015-90m7h-C1221		17041	0	0	0.06639	0.0229	0.10926	0	2.75823	2.73615
MedEnr-OCT2015-90m7h-C1237		16958	0	0.15633	0	0.59845	1.7567	0.92161	0.68721	4.86626
MedEnr-OCT2015-90m7h-C124		46021	0	0.04115	0	0.01696	0.33984	0.07277	0.40516	4.74417
MedEnr-OCT2015-90m7h-C1242		16936	0	0.06709	0	0	0.13192	0	0.89453	3.43047
MedEnr-OCT2015-90m7h-C1245		16921	0.84621	0.02238	0	2.23754	1.80455	0.15394	2.96145	4.59259
MedEnr-OCT2015-90m7h-C125	Archaea	46007	0	0.00823	0	0.00849	0.15378	0	0.18576	8.88798
MedEnr-OCT2015-90m7h-C126		45876	0	0.02476	0.00822	0.16166	0.39773	0.16223	1.3802	5.05763
MedEnr-OCT2015-90m7h-C1278		16732	0	0.02264	0	0.09331	0.55638	0.06672	0.20895	3.73769
MedEnr-OCT2015-90m7h-C1285		16706	0.20848	0	0	1.47195	0.82473	0.22274	3.48786	3.89857
MedEnr-OCT2015-90m7h-C1288		16694	1.04316	0.93013	0.4518	1.91725	6.49103	3.14292	1.11692	4.56637
MedEnr-OCT2015-90m7h-C1296		16651	0	0.11372	0.02265	2.13318	2.6389	0.80452	1.46974	3.80032
MedEnr-OCT2015-90m7h-C1297		16645	0	0.04551	0	0.39865	0.76064	0.13414	0.42008	2.84571
MedEnr-OCT2015-90m7h-C1299		16639	0	0.09104	0.09066	0.42225	0.80567	0.08946	3.52525	8.8071
MedEnr-OCT2015-90m7h-C1309		16589	3.80249	1.91769	2.18236	5.38817	5.76891	5.67511	1.1474	4.12683
MedEnr-OCT2015-90m7h-C1312		16579	0	0.27412	0.06824	0.5415	1.86424	1.45891	0.60919	3.5713
MedEnr-OCT2015-90m7h-C1344		16378	0	0.09249	0.02303	0	0.13642	0	3.15451	2.73394
MedEnr-OCT2015-90m7h-C1356		16314	0	0	0	0.14355	0.22826	0.06843	0.14287	2.99418
MedEnr-OCT2015-90m7h-C1358	Thaumarchaeota	16308	0	0.09289	0	0.02393	0.18267	0	4.59724	3.88025
MedEnr-OCT2015-90m7h-C1376		16217	0	0.77066	0	0	0.22962	0	0.83838	6.18392
MedEnr-OCT2015-90m7h-C1381		16170	0	0	0	0.28967	3.08586	0.80544	0.04805	13.2277
MedEnr-OCT2015-90m7h-C1382		16168	0	0.04685	0.06997	0.36213	0.41457	0.04603	3.17146	4.14273
MedEnr-OCT2015-90m7h-C1388		16137	0.02398	0.04694	0	0.33863	0.83073	0.25365	1.08325	4.19656
MedEnr-OCT2015-90m7h-C1389		16127	0.024	0.16438	0.04677	1.08914	1.4085	0.78451	1.37298	4.47451
MedEnr-OCT2015-90m7h-C1393		16113	0	0.0235	0.04681	0	0	0.02309	0.19286	4.63916
MedEnr-OCT2015-90m7h-C1402		16058	0	0.02358	0	0.17015	1.20585	0.11586	0.21772	9.63274
MedEnr-OCT2015-90m7h-C1404	Cyanophage	16049	0	1.0383	0	0.12161	0.11601	0	0.62931	5.57997
MedEnr-OCT2015-90m7h-C1415		15989	0	0	0.04717	0.02441	0.32605	0	2.57529	2.68474
MedEnr-OCT2015-90m7h-C1424		15935	0	0.0713	0.02366	0.12247	0.42063	0	3.75413	2.99573
MedEnr-OCT2015-90m7h-C1425		15926	0	0	0.02368	0	0.16367	0.02336	0.68295	4.50775
MedEnr-OCT2015-90m7h-C1436		15827	0	0	0	0.41925	0.847	0.28214	1.1781	5.98558
MedEnr-OCT2015-90m7h-C1442		15814	0.02447	0.14369	0.07154	0.51833	1.55412	1.74126	0	3.69726
MedEnr-OCT2015-90m7h-C145		43283	0	0.35874	0.27881	0.85671	1.64323	0.26651	17.1149	18.6809
MedEnr-OCT2015-90m7h-C148	Archaea	43037	0.03597	0.2552	0.08763	1.58717	4.65502	1.66874	1.8684	10.4816
MedEnr-OCT2015-90m7h-C1486		15675	0	0.04832	0.02406	1.14545	1.1878	0.59348	2.05689	3.30511
MedEnr-OCT2015-90m7h-C1544	Euryarchaeota	15405	0	0	0	0.4054	2.68313	0.86959	0.07565	11.9388
MedEnr-OCT2015-90m7h-C1550		15374	0	0.02463	0.2453	0.10155	0.26643	0.12102	3.63845	2.59957
MedEnr-OCT2015-90m7h-C1564		15331	0	0.07411	0	0	0.04858	0	0.32939	3.2103
MedEnr-OCT2015-90m7h-C1568		15322	0.12629	0.1483	0.09845	2.9296	2.72197	1.4086	5.32408	6.40022
MedEnr-OCT2015-90m7h-C1573		15302	3.16128	2.00473	1.23225	1.63252	7.61689	3.23428	1.09159	4.35301
MedEnr-OCT2015-90m7h-C1584		15243	0	0	0	0.28167	0.73288	0.04882	5.65748	8.10851
MedEnr-OCT2015-90m7h-C1591	Archaea	15207	0	0.09962	0.0744	0.23101	0.63667	0.09788	2.70771	6.83798
MedEnr-OCT2015-90m7h-C1598		15177	0.91795	0	0	1.72312	1.27585	0.12259	3.09699	4.82774
MedEnr-OCT2015-90m7h-C1606		15140	0	0	0	0	0.04919	0	0.25657	3.37301
MedEnr-OCT2015-90m7h-C1608		15135	0	0	0	0.67053	0.73811	0.09835	1.18064	3.05627
MedEnr-OCT2015-90m7h-C161		41233	0	0.08266	0.06402	0.99396	1.9507	0.87539	0.50873	3.24884
MedEnr-OCT2015-90m7h-C1612		15098	0.41011	0.20067	0.17485	1.13752	2.14576	1.45414	0.10292	4.31378
MedEnr-OCT2015-90m7h-C162	Thaumarchaeota	41184	0	0.12874	0.05494	0.32224	0.77759	0.11746	3.36729	8.65292
MedEnr-OCT2015-90m7h-C1632		15036	0	0	0	0.07788	0.04953	0	2.0668	3.49479
MedEnr-OCT2015-90m7h-C1656		14954	0	0.1013	0.30262	0.33932	1.02096	0.09954	13.352	9.97269
MedEnr-OCT2015-90m7h-C1687		14837	0	0	0.02542	0.55246	0.75293	0.17556	1.72798	3.04284
MedEnr-OCT2015-90m7h-C1689		14812	0	0	0	0.21081	0.17598	0	1.57354	3.24784
MedEnr-OCT2015-90m7h-C1691		14811	0	0.2557	0.07638	1.55487	1.75993	1.15571	0.20982	4.14752
MedEnr-OCT2015-90m7h-C1694		14792	0	0	0	0.02639	0.17622	0	1.57567	4.55312
MedEnr-OCT2015-90m7h-C1695		14792	0	0.0256	0	0.02639	0.02517	0	2.17968	4.42804
MedEnr-OCT2015-90m7h-C170		40549	0	0.11208	0.1302	0.85672	1.2122	0.12848	5.66172	7.91232
MedEnr-OCT2015-90m7h-C1710	Thaumarchaeota	14724	0	0.02572	0.07684	0	0.12645	0	2.34804	3.82017
MedEnr-OCT2015-90m7h-C1721		14691	0	0	0	0	2.43333	1.34245	0.02644	3.60205
MedEnr-OCT2015-90m7h-C1727		14663	0.18475	0.02583	0.05144	2.26267	3.98711	1.67493	1.19215	3.60893
MedEnr-OCT2015-90m7h-C1733		14615	0	0.05183	0.10321	0.29378	0.73889	0.17823	3.37556	5.16531
MedEnr-OCT2015-90m7h-C1751		14496	0	0.05225	0.05203	0.21541	0.4367	0.05134	2.35817	4.69715
MedEnr-OCT2015-90m7h-C1752		14495	0	0	0	0.05386	0.17983	0	2.06354	3.16569
MedEnr-OCT2015-90m7h-C1761		14444	0	0.07866	0.07833	0	0.28359	0	3.5231	3.27935
MedEnr-OCT2015-90m7h-C1778		14398	0	0.0263	0	0.75907	1.06038	0.20676	3.23758	5.57728
MedEnr-OCT2015-90m7h-C1805	Archaea	14254	0	0.05314	0	0.52029	1.12335	0.31327	0.98109	5.9192
MedEnr-OCT2015-90m7h-C1815		14220	0	0	0.05304	2.03123	2.72342	0.88972	1.22929	3.38305
MedEnr-OCT2015-90m7h-C1824		14189	0	0.16015	0.07973	0.77025	0.81356	0.15735	0.41066	4.45974
MedEnr-OCT2015-90m7h-C1830	Thaumarchaeota	14179	0	0.05342	0.05319	0	0.13131	0	3.80811	4.33239
MedEnr-OCT2015-90m7h-C1844		14148	0	0.02677	0.05331	0	0.18424	0	3.26733	2.85099
MedEnr-OCT2015-90m7h-C1845		14146	0	0	0.05332	0.99333	2.13222	0.65763	1.23572	5.23192
MedEnr-OCT2015-90m7h-C1846		14145	0.05472	0	0.05332	0.44151	0.9214	0.23676	1.45551	3.03473
MedEnr-OCT2015-90m7h-C1891		14005	0.02763	0.24338	0.10771	0.78037	1.78145	1.38164	0.02774	4.12198
MedEnr-OCT2015-90m7h-C1901	Actinobacteria	14000	0	0.10838	0.10792	0.74413	0.87919	0.05325	7.65082	5.26871
MedEnr-OCT2015-90m7h-C1911		13943	0	0.05432	0.24342	0.64387	0.58755	0.08006	3.56611	6.58204
MedEnr-OCT2015-90m7h-C1924		13894	0	0	0	0.36521	1.12565	0.4553	1.06242	2.74331
MedEnr-OCT2015-90m7h-C1933		13857	1.25674	0	0	2.25345	1.61236	0.26854	2.97151	4.1393
MedEnr-OCT2015-90m7h-C1938	Cyanophage	13845	0	0.05471	0.46305	0.25373	0.96826	0.10751	3.0302	5.96042
MedEnr-OCT2015-90m7h-C1948	Cyanophage	13803	0	0.05488	0.30054	0	0.32374	0	3.79928	11.7158
MedEnr-OCT2015-90m7h-C1969		13720	0	0	0	0.25605	0.9228	0.08137	0.62289	7.41726
MedEnr-OCT2015-90m7h-C1977		13692	0	0.05532	0	0.54164	1.6046	0.2446	0.90787	3.86486
MedEnr-OCT2015-90m7h-C1982		13656	0	0.05547	0.08284	0.08575	0.32722	0	3.21437	3.41438
MedEnr-OCT2015-90m7h-C1999		13588	0	0	0	0	0.0274	0	0.68611	4.60252
MedEnr-OCT2015-90m7h-C2018		13520	0	0	0	0.02887	0.3856	0	0.66083	6.26792
MedEnr-OCT2015-90m7h-C204		38077	0	0	0	0.5023	1.04641	0.19545	1.22422	3.51812
MedEnr-OCT2015-90m7h-C2040		13427	0	0	0	0.23256	0.27733	0.02771	0.49183	3.30725
MedEnr-OCT2015-90m7h-C2049		13396	0	0.02827	0	1.01981	1.41768	0.88889	0.86993	4.50274
MedEnr-OCT2015-90m7h-C2056		13378	0	0	0.02819	0.496	0.72371	0.33378	0.31941	3.95558
MedEnr-OCT2015-90m7h-C2058		13376	0.02893	0.76446	0.62026	1.86758	2.50552	1.08496	17.7732	16.295
MedEnr-OCT2015-90m7h-C2061		13369	0	0	0	0	0.22283	0	1.39471	3.43232
MedEnr-OCT2015-90m7h-C2067		13351	0	0.14183	0.02825	0.20465	0.47415	0.11148	3.37509	3.93586
MedEnr-OCT2015-90m7h-C207		37805	0.01024	0.05009	0.04988	0.40266	1.01454	0.2756	1.56183	5.08022
MedEnr-OCT2015-90m7h-C2089	Cyanophage	13281	0	0.14258	0.11358	0.32329	0.67292	0.02802	4.62133	5.43336
MedEnr-OCT2015-90m7h-C2096		13259	0	0.02856	0.05688	0.58877	0.70212	0.02806	0.96682	4.21435
MedEnr-OCT2015-90m7h-C2112		13215	0	0.08597	0.08561	2.62875	3.40957	0.73212	10.8174	18.0617
MedEnr-OCT2015-90m7h-C2118		13189	0	0	0	0.05919	0.19764	0.05643	0.53015	3.42305
MedEnr-OCT2015-90m7h-C2122		13184	0.20547	0.17236	0.14302	4.17444	6.77868	5.9836	3.91873	5.89436
MedEnr-OCT2015-90m7h-C2131		13167	0	0.17258	0.02864	0.50395	0.53734	0.05652	3.83528	5.25557
MedEnr-OCT2015-90m7h-C2141		13137	0	0.02883	0.02871	0	0.14173	0	1.15321	3.12674
MedEnr-OCT2015-90m7h-C2145		13122	0	0.08658	0.20118	0.89238	1.73106	0.39701	2.10184	5.6402
MedEnr-OCT2015-90m7h-C2156		13083	0	0.02895	0	0.05967	0.14231	0	1.03921	6.50557
MedEnr-OCT2015-90m7h-C2166		13058	0.02964	0.55106	0.722	2.92938	3.73573	0.76942	18.0573	18.7606
MedEnr-OCT2015-90m7h-C217		36910	0	0.13339	0.02044	0.15862	0.31275	0.1109	1.73652	4.00031
MedEnr-OCT2015-90m7h-C2170	Cyanophage	13039	0	0.08714	0.2603	0.35922	0.77108	0	2.50251	5.5342
MedEnr-OCT2015-90m7h-C2181		12987	0.0298	0.08748	0.05808	0.30055	0.57346	0.14326	6.40097	3.9037
MedEnr-OCT2015-90m7h-C2201		12924	0	0.05861	0	0.33222	0.80676	0.23034	3.18603	4.40949
MedEnr-OCT2015-90m7h-C2207		12888	2.37215	1.55743	1.75566	3.21031	2.80264	1.76124	1.38648	2.92873
MedEnr-OCT2015-90m7h-C221		36372	0.02128	0.03124	0	0.48292	0.95213	0.10231	1.23889	3.7746
MedEnr-OCT2015-90m7h-C2220		12851	0	0.02947	0.02934	0.24298	0.75339	0.11582	1.48115	4.14658
MedEnr-OCT2015-90m7h-C2223		12840	0	0.02949	0.08811	0.85118	0.63803	0.1449	3.93296	3.71783
MedEnr-OCT2015-90m7h-C2230		12825	0.3621	0.23624	0.05881	0.91304	3.13579	1.07354	1.99907	5.10717
MedEnr-OCT2015-90m7h-C2235		12818	0	0.02955	0	0	0.02905	0	0.42427	3.40664
MedEnr-OCT2015-90m7h-C2242		12791	1.17994	0.56256	0.79604	3.08207	4.2504	3.43283	1.15404	3.81887
MedEnr-OCT2015-90m7h-C2259		12743	0	0.1486	0.11838	2.97116	2.25009	0.73003	3.0179	4.12365
MedEnr-OCT2015-90m7h-C2282		12680	0	0.02987	0.05948	0.30783	1.11595	0.26412	0.94969	3.2978
MedEnr-OCT2015-90m7h-C2288		12662	0	0	0	0.43157	0.3235	0	0.79765	2.68875
MedEnr-OCT2015-90m7h-C2296		12653	0	0	0	0.03085	0.20601	0	1.50433	2.16423
MedEnr-OCT2015-90m7h-C2299		12639	0.06124	0.65922	0.44756	2.68678	2.65162	0.88325	17.9183	14.9322
MedEnr-OCT2015-90m7h-C23		89351	0	0.00424	0.01266	0	0.07502	0.00833	0.38258	5.05686
MedEnr-OCT2015-90m7h-C2326		12565	0	0.06028	0.09004	0.06213	0.50381	0.08885	2.50417	2.76841
MedEnr-OCT2015-90m7h-C2340	Cyanophage	12535	0	0.03021	0.33093	0	0.47531	0.02969	1.17761	39.7066
MedEnr-OCT2015-90m7h-C235		35373	0.01094	0.02141	0.03198	1.47863	1.40011	0.27351	8.59866	12.6689
MedEnr-OCT2015-90m7h-C2360	Actinobacteria	12494	0	0.12125	0.06037	0	0.32785	0	1.95875	3.67269
MedEnr-OCT2015-90m7h-C2361		12491	0	0.09096	0	0.71872	0.92416	0.26811	2.519	3.40695
MedEnr-OCT2015-90m7h-C2368		12476	0	0	0	0.06257	0.11939	0.08948	2.08612	4.2119
MedEnr-OCT2015-90m7h-C237		35159	0	0.63553	0.69719	2.55339	2.39361	0.88903	17.1915	15.2509
MedEnr-OCT2015-90m7h-C2379		12437	0	0.0609	0.12129	0.75322	0.95811	0.08976	5.52839	5.41527
MedEnr-OCT2015-90m7h-C2384		12425	0.03115	0.12192	0.03035	0.4398	0.68931	0.11979	3.22019	4.67593
MedEnr-OCT2015-90m7h-C2387		12408	0	0.09157	0.15197	1.6987	1.17043	0.5698	7.26318	7.84366
MedEnr-OCT2015-90m7h-C2401		12374	0	0.0306	0	0.34698	0.69215	0.2105	0.34532	3.58869
MedEnr-OCT2015-90m7h-C242		34993	0	0.02164	0.10777	0.02231	0.15962	0.02127	2.65313	3.50035
MedEnr-OCT2015-90m7h-C2462	Actinobacteria	12239	0	0.09283	0.03081	0.66973	0.66936	0.51686	0.22217	4.17252
MedEnr-OCT2015-90m7h-C2479	Cyanophage	12207	0	0.06205	0.15447	0.47963	0.51859	0.03048	4.45513	7.36652
MedEnr-OCT2015-90m7h-C248		34680	0	0.02184	0.03262	0.12381	0.1718	0.02146	0.72807	3.98011
MedEnr-OCT2015-90m7h-C2483		12193	1.61868	0.99394	0.83508	4.00152	5.61938	3.50963	1.46551	3.91511
MedEnr-OCT2015-90m7h-C2514		12120	0	0.03125	0	1.12718	1.38258	0.24562	2.37176	3.20591
MedEnr-OCT2015-90m7h-C2541		12049	0.32118	0	0	2.33242	1.8234	0.27795	4.22339	4.79113
MedEnr-OCT2015-90m7h-C255		34410	0.01125	0.13207	0.08768	1.04359	2.01284	1.78432	0.06773	3.81776
MedEnr-OCT2015-90m7h-C256		34343	0.04507	0.06617	0.10981	0.88651	1.39872	0.70429	2.47712	5.62467
MedEnr-OCT2015-90m7h-C2567		11988	0	0	0.03146	0.1628	0.40381	0.12416	2.81912	3.76598
MedEnr-OCT2015-90m7h-C2584	Cyanophage	11942	0	0	0.06316	0.09805	0.40536	0	3.90342	7.28208
MedEnr-OCT2015-90m7h-C2605		11879	0.5864	0.28693	0.28572	8.57604	14.0123	15.2554	3.53171	6.69767
MedEnr-OCT2015-90m7h-C2607		11874	0.06518	0.06379	0.03176	1.44638	4.20232	1.00283	0.94873	4.48777
MedEnr-OCT2015-90m7h-C2608		11874	0.03259	0.0319	0	1.01904	1.97572	0.84614	0.49072	2.55553
MedEnr-OCT2015-90m7h-C261		34103	0	0.07774	0.02212	1.03009	2.26026	2.42234	0.58092	3.87383
MedEnr-OCT2015-90m7h-C2611		11858	0	0.15969	0.15901	0.29625	0.84788	0.03138	2.9483	8.26988
MedEnr-OCT2015-90m7h-C262		34102	0	0.04442	0.09952	0.03434	0.22931	0	2.56297	3.40733
MedEnr-OCT2015-90m7h-C2635		11792	0	0	0	0.1986	1.64209	0.18934	2.04242	4.48759
MedEnr-OCT2015-90m7h-C2659		11744	0	0.16124	0	0.66472	1.90246	0.79213	0.49615	3.34006
MedEnr-OCT2015-90m7h-C2665		11726	0	0.0323	0.09648	0.19972	0.34932	0	2.21955	5.17558
MedEnr-OCT2015-90m7h-C2678		11692	0	0.06478	0.06451	0.06677	0.35033	0	0.49836	3.10172
MedEnr-OCT2015-90m7h-C2681		11688	0	0	0	0.06679	0.44604	0	2.22677	3.70434
MedEnr-OCT2015-90m7h-C2686		11682	0	0	0.03228	0.20047	0.82878	0.12742	1.66262	3.35779
MedEnr-OCT2015-90m7h-C27		82901	1.25572	0	0.03639	2.34004	1.65748	0.22892	3.18632	5.44584
MedEnr-OCT2015-90m7h-C2701		11647	0	0	0.03238	0.03351	2.62169	1.885	0.06671	4.67055
MedEnr-OCT2015-90m7h-C2724		11576	0	0.06543	0.09773	0.53949	0.8042	0.38574	0.40268	8.50331
MedEnr-OCT2015-90m7h-C2742		11543	0	0.09843	0.06534	0.43959	0.77424	0	0.67306	10.6114
MedEnr-OCT2015-90m7h-C2750		11527	0.03357	0.09857	0	0.10159	1.03375	0.41966	1.95457	4.23763
MedEnr-OCT2015-90m7h-C2815		11366	0	0	0.03318	0	0.06552	0	1.3329	3.71161
MedEnr-OCT2015-90m7h-C2817		11363	0	0	0	0.61831	0.75373	0.0655	1.19651	4.42905
MedEnr-OCT2015-90m7h-C2819		11361	0	0	0	0	0.26221	0.13101	0.27353	4.59269
MedEnr-OCT2015-90m7h-C2830		11339	0	0.167	0.23281	1.20481	1.14941	0.36099	5.61837	7.5388
MedEnr-OCT2015-90m7h-C2831	Thaumarchaeota	11331	0	0.13369	0.03328	0.79229	0.9859	0.03284	4.62814	6.5317
MedEnr-OCT2015-90m7h-C2843		11298	0.23977	0.26817	0.10014	1.52012	1.68093	0.69166	2.20049	3.70119
MedEnr-OCT2015-90m7h-C2861		11270	0	0	0	0.06927	0.16521	0	3.3434	2.88951
MedEnr-OCT2015-90m7h-C2865		11260	0.13747	0.23544	0.03349	0.48531	1.62046	0.33047	1.96643	4.27238
MedEnr-OCT2015-90m7h-C2869		11253	0	0.03366	0.30161	0.52029	0.66182	0.42988	2.38189	3.9133
MedEnr-OCT2015-90m7h-C2897		11187	0	0	0	1.04673	1.26489	0.53221	0.10417	2.84478
MedEnr-OCT2015-90m7h-C2912		11142	0	0.13596	0.33846	0.73567	2.27262	0.16699	11.1565	17.968
MedEnr-OCT2015-90m7h-C2949		11060	0	0.06848	0	2.82332	4.04024	1.24486	2.21272	3.71392
MedEnr-OCT2015-90m7h-C2963		11028	0	0.10302	0.10259	1.66352	2.29611	0.57362	4.05081	4.29515
MedEnr-OCT2015-90m7h-C2965		11028	0.28073	0.10302	0.30776	2.9377	5.09872	2.29449	0.63404	5.83872
MedEnr-OCT2015-90m7h-C2970		11023	0	0	0	0.92066	0.9121	0.13503	1.19817	3.08854
MedEnr-OCT2015-90m7h-C2978		11014	0.17568	0.10316	0.1712	2.23265	1.8257	1.3852	1.79873	3.02386
MedEnr-OCT2015-90m7h-C2992		10988	0	0	0	0.03552	0.54223	0.03387	3.11104	4.4455
MedEnr-OCT2015-90m7h-C3010		10960	0	0.03455	0	0.39175	1.18916	0.20371	1.31139	3.03876
MedEnr-OCT2015-90m7h-C3013		10945	0	0.0692	0	0.78457	0.95263	0.27199	3.62014	3.34722
MedEnr-OCT2015-90m7h-C3016		10941	0	0	0	0.1427	0.74877	0.3061	0.10651	3.11169
MedEnr-OCT2015-90m7h-C3022		10934	0.17697	0.13855	0.17245	1.42793	1.32821	0.68065	2.02506	3.35059
MedEnr-OCT2015-90m7h-C3042		10897	0	0	0	0	0.10252	0	0.10695	3.26008
MedEnr-OCT2015-90m7h-C3046	Cyanophage	10893	0.14211	0.06953	0	0.14333	0.20511	0	2.9242	3.80483
MedEnr-OCT2015-90m7h-C3054		10877	0	0	0	0.32297	3.6974	4.20795	0	7.11053
MedEnr-OCT2015-90m7h-C3072		10852	0	0	0.13901	0	0.13726	0	2.68468	5.66061
MedEnr-OCT2015-90m7h-C3097		10810	0.1432	0.38538	0.03489	1.84149	3.61697	1.78999	0.97024	2.87553
MedEnr-OCT2015-90m7h-C3129		10764	0	0	0.10511	0.43515	1.07243	0.10371	1.22701	3.88481
MedEnr-OCT2015-90m7h-C3131		10761	0.14385	0.28155	0.03505	0.79799	2.76833	1.17571	1.11905	4.05783
MedEnr-OCT2015-90m7h-C3139		10744	0	0	0	0	0.20795	0.03464	0.43387	4.06425
MedEnr-OCT2015-90m7h-C3142		10742	2.88208	1.69229	1.5798	2.9069	3.29321	2.4595	1.22952	3.16933
MedEnr-OCT2015-90m7h-C3155		10705	0.39766	0.24765	0.2466	2.00541	3.58288	0.83425	1.95951	5.0124
MedEnr-OCT2015-90m7h-C3157		10703	0	0.03538	0.17617	0.07294	0.86979	0.13907	3.01241	5.11707
MedEnr-OCT2015-90m7h-C3179		10658	0	0	0	0.32961	0.80359	0.06983	4.59236	7.60385
MedEnr-OCT2015-90m7h-C3186		10647	0	0.03557	0.03542	0.14664	0.4197	0.0699	1.97019	3.1281
MedEnr-OCT2015-90m7h-C32		80907	0.36352	0.3183	0.19576	5.99186	10.3741	6.81151	0.66737	4.64242
MedEnr-OCT2015-90m7h-C3205		10619	0.03644	0.24965	0.07103	2.42597	2.31442	1.96236	1.97538	4.28634
MedEnr-OCT2015-90m7h-C3210		10612	0	0.03569	0.03554	0.33103	0.45617	0.21039	0.47587	3.31277
MedEnr-OCT2015-90m7h-C3228	SAR11	10575	3.87906	1.82646	2.17533	5.35197	3.90862	3.44842	1.46934	3.32436
MedEnr-OCT2015-90m7h-C3253		10518	0	0	0.46611	0.3711	0.60186	0.24765	2.69606	5.48853
MedEnr-OCT2015-90m7h-C3263		10502	0	0.03606	0.10773	0	0.31912	0	2.40427	3.80554
MedEnr-OCT2015-90m7h-C3281		10469	0	0.07235	0.07204	0.29827	0.88923	0.60425	0.33395	5.05471
MedEnr-OCT2015-90m7h-C329		31303	0	0.0363	0.14457	0.17457	0.47583	0.07132	5.65874	3.94844
MedEnr-OCT2015-90m7h-C3309		10414	0	0	0.14485	0.11244	0.39333	0.03573	4.14044	3.09148
MedEnr-OCT2015-90m7h-C3326		10378	0	0.10948	0	0.48894	0.89703	0.46613	0.93577	5.91915
MedEnr-OCT2015-90m7h-C3342		10354	0	0	0	1.31943	0.5035	0.35939	3.37656	3.75272
MedEnr-OCT2015-90m7h-C3347		10346	0	0.03661	0.1458	0.15091	0.35992	0.25177	3.56691	3.97023
MedEnr-OCT2015-90m7h-C3362		10315	0	0	0.21936	2.04338	2.70753	0.5772	10.0174	17.4354
MedEnr-OCT2015-90m7h-C3374		10291	0	0	0	0	0.03618	0	0.94368	2.94864
MedEnr-OCT2015-90m7h-C3375		10290	0	0	0.03665	0	0.43426	0.03616	1.32128	2.73315
MedEnr-OCT2015-90m7h-C3378		10287	0	0.11045	0.14664	0.11383	0.25339	0.03617	1.09509	3.0577
MedEnr-OCT2015-90m7h-C3422		10223	0	0.03705	0	0	0.25498	0	0.91196	3.11304
MedEnr-OCT2015-90m7h-C3449		10184	0	0.18594	0.07406	0.4216	0.69473	0.14615	7.81945	4.21507
MedEnr-OCT2015-90m7h-C345		30454	0	0.03731	0.02477	0.03845	0.15896	0	0.4592	3.40234
MedEnr-OCT2015-90m7h-C3467		10153	0.45739	0.33571	0.29715	1.80688	2.71406	1.20947	1.5304	4.41017
MedEnr-OCT2015-90m7h-C3502		10116	1.60672	1.12313	1.11838	9.02886	7.76703	6.73157	1.80481	3.51178
MedEnr-OCT2015-90m7h-C3509		10111	0	0.07491	0	0	0.11049	0.0368	2.68933	3.84291
MedEnr-OCT2015-90m7h-C3515		10094	0.03834	0.22512	0.22416	2.12679	3.32017	1.43772	5.15682	6.96554
MedEnr-OCT2015-90m7h-C3522		10082	0	0.03757	0.03741	0	0.36935	0	0.53941	1.90863
MedEnr-OCT2015-90m7h-C3539		10060	0	0	0	0	0.29612	0	0.2703	2.6485
MedEnr-OCT2015-90m7h-C3547		10045	0.50084	0.45243	0.48806	2.37031	4.8192	2.96356	2.707	5.56278
MedEnr-OCT2015-90m7h-C3563		10018	0.23178	0.37804	0.33879	1.20783	3.4197	1.30005	1.1245	5.17145
MedEnr-OCT2015-90m7h-C357		30082	0.01286	0.01259	0.05015	1.37539	1.55971	0.3711	9.2846	12.5721
MedEnr-OCT2015-90m7h-C3573	Cyanophage	10007	0	0.11354	0.15074	0.54607	0.59538	0.14874	4.42529	8.39434
MedEnr-OCT2015-90m7h-C365		29861	0.28512	0.3678	0.3031	6.19584	9.9513	6.4052	0.53336	4.325
MedEnr-OCT2015-90m7h-C369	Cyanophage	29727	0	0.1274	0.38058	0.38078	0.6639	0.05007	2.74416	5.35281
MedEnr-OCT2015-90m7h-C371		29668	0.05218	0.08936	0.15254	0.82885	1.38066	0.66476	2.51393	5.00174
MedEnr-OCT2015-90m7h-C3758	Thaumarchaeota	9791	0	0.23208	0.07703	1.07637	1.59736	0.30405	1.26959	3.55276
MedEnr-OCT2015-90m7h-C377	Thaumarchaeota	29373	0	0.14183	0.12839	0.4651	0.64655	0.05067	4.39067	4.49764
MedEnr-OCT2015-90m7h-C391		28954	0	0	0	0.16177	0.43727	0.12852	0.6574	3.34856
MedEnr-OCT2015-90m7h-C394	Cyanophage	28857	0	0.27561	0.07841	0.48694	0.85168	0.09027	3.76919	5.70655
MedEnr-OCT2015-90m7h-C396	Thaumarchaeota	28827	0	0.01314	0.03925	0	0.20668	0.01291	2.66813	4.30041
MedEnr-OCT2015-90m7h-C399		28782	0.20168	0.3158	0.17033	0.773	1.30672	1.12479	0.24294	4.48714
MedEnr-OCT2015-90m7h-C405		28427	0	0	0.02653	0.02746	0.49778	0.01309	3.5939	3.18933
MedEnr-OCT2015-90m7h-C446	Archaea	26972	0.0287	0.37911	0.25167	0.37626	1.36679	0.23454	4.6519	10.729
MedEnr-OCT2015-90m7h-C467		26330	0	0.10069	0.14323	1.11182	1.11727	0.22612	6.1964	8.2078
MedEnr-OCT2015-90m7h-C475		26194	0	0.04337	0	0.78977	1.22258	0.34094	2.00204	4.08283
MedEnr-OCT2015-90m7h-C50		66665	0.0058	0.72716	0.75237	2.50595	3.29002	0.70889	18.489	18.851
MedEnr-OCT2015-90m7h-C510		25530	0	0	0.01477	0.03058	0.2042	0.04373	0.53255	3.47877
MedEnr-OCT2015-90m7h-C511		25504	0	0	0.02957	0.42853	0.61323	0.05836	5.01105	7.48697
MedEnr-OCT2015-90m7h-C525		25282	0.01531	0.05992	0.05967	1.80634	2.03259	0.78008	4.19462	5.09369
MedEnr-OCT2015-90m7h-C526		25278	0.03062	0	0	0.38603	0.48613	0.05888	3.21177	3.95263
MedEnr-OCT2015-90m7h-C533		25127	0	0.01507	0	0	0.25193	0.08886	0.18551	5.18402
MedEnr-OCT2015-90m7h-C548	Thaumarchaeota	24826	0	0.13729	0.06076	0.39306	0.65998	0.25481	2.06542	4.15875
MedEnr-OCT2015-90m7h-C5488	Archaea	7987	0	0.23709	0.04721	0.14661	0.83921	0.04659	2.96679	9.77605
MedEnr-OCT2015-90m7h-C55	Archaea	63825	0	0	0	0.14677	1.45275	0.24487	0.00609	4.97464
MedEnr-OCT2015-90m7h-C552		24780	0	0.01529	0.10653	0.11026	0.24044	0.01502	2.64927	5.01768
MedEnr-OCT2015-90m7h-C553		24765	0	0.24468	0.39592	1.056	2.01487	0.21036	12.0309	12.5368
MedEnr-OCT2015-90m7h-C5550	Thaumarchaeota	7935	0	0	0	0.14757	0.56314	0	2.5946	4.52366
MedEnr-OCT2015-90m7h-C560		24617	0	0.04615	0.01532	1.36361	1.39166	0.3779	1.67268	3.20191
MedEnr-OCT2015-90m7h-C5669	Thaumarchaeota	7850	0	0.09649	0.04804	0.69612	0.61667	0.33182	3.76084	6.74111
MedEnr-OCT2015-90m7h-C568		24403	0	0.06208	0.09272	1.61549	2.80773	0.73193	4.80734	5.5198
MedEnr-OCT2015-90m7h-C570		24398	0	0.09313	0.01546	0.83191	0.76313	0.4423	3.3913	2.94247
MedEnr-OCT2015-90m7h-C587		24058	0.14477	0	0	1.50886	1.31565	0.10827	3.13244	4.59914
MedEnr-OCT2015-90m7h-C59		62517	0.01238	0.07875	0.06032	1.09261	3.19263	2.35706	0.32932	4.84195
MedEnr-OCT2015-90m7h-C590		24044	0	0.063	0	0	0.13938	0	0.35543	3.40134
MedEnr-OCT2015-90m7h-C599	Cyanophage	23931	0	0.25321	0.25214	0.44038	0.80914	0.10885	4.44765	7.48427
MedEnr-OCT2015-90m7h-C600		23911	0	0.06336	0.17349	1.12636	2.25814	2.00755	0.76356	3.88455
MedEnr-OCT2015-90m7h-C6074	Thaumarchaeota	7603	0	0	0	0	0.14693	0	2.19697	4.1858
MedEnr-OCT2015-90m7h-C618		23605	0	0.06418	0.07988	0	0.15775	0	1.10258	4.32683
MedEnr-OCT2015-90m7h-C625		23462	0	0.01614	0.12859	0.64882	1.30146	0.11102	5.52997	6.64021
MedEnr-OCT2015-90m7h-C638	Archaea	23092	0	0.0984	0.03266	0.13522	0.32251	0	2.05229	3.23709
MedEnr-OCT2015-90m7h-C64		61653	0	0.67571	0.62391	2.37412	3.12865	0.97173	17.7616	16.6861
MedEnr-OCT2015-90m7h-C644		22950	0	0	0.16432	0.08504	0.37319	0.01621	3.58834	2.85401
MedEnr-OCT2015-90m7h-C647		22921	0	0.03305	0.06581	0.03406	0.19495	0	2.50824	2.7769
MedEnr-OCT2015-90m7h-C6569	Thaumarchaeota	7278	0	0	0	0.16089	0.25582	0	1.12085	2.59312
MedEnr-OCT2015-90m7h-C660		22672	0	0.23386	0.06653	0.51649	0.72268	0.16413	4.19775	3.96626
MedEnr-OCT2015-90m7h-C662		22665	0	0.63496	0.54908	2.06658	2.99018	0.9194	15.4936	15.2169
MedEnr-OCT2015-90m7h-C671		22611	0	0	0	0.20715	0.32938	0.18103	0.18898	3.74783
MedEnr-OCT2015-90m7h-C681	Cyanophage	22410	0	0.1183	0.05048	0.17417	0.28248	0.03321	1.94141	3.61632
MedEnr-OCT2015-90m7h-C685		22376	0	0.08463	0.35393	0	0.94858	0	1.30203	59.206
MedEnr-OCT2015-90m7h-C696	Thaumarchaeota	22109	0	0.1713	0.30703	0.63557	0.84214	0.18514	4.26951	11.7499
MedEnr-OCT2015-90m7h-C703		22074	0	0.05147	0	0.19451	0.64104	0.05057	0.58073	6.20277
MedEnr-OCT2015-90m7h-C71		59769	0	0.22177	0.46691	1.11672	2.13697	0.24903	12.1146	14.7727
MedEnr-OCT2015-90m7h-C72		59617	0	0.01906	0.08223	1.27671	1.78639	0.4494	2.25448	4.29537
MedEnr-OCT2015-90m7h-C726	Cyanophage	21783	0	0.1217	0.06925	0.41213	0.75217	0.01708	4.38691	4.7397
MedEnr-OCT2015-90m7h-C73	Thaumarchaeota	59498	0	0.01273	0.15212	0	0.35048	0	4.56368	6.44973
MedEnr-OCT2015-90m7h-C736		21639	0	0.08751	0.03486	1.8038	2.97708	0.85982	1.93878	3.74517
MedEnr-OCT2015-90m7h-C74		58790	0.01317	0.6764	0.6992	2.58269	3.05932	0.76587	18.1178	17.9834
MedEnr-OCT2015-90m7h-C741		21587	0	0.19298	0.08735	0.74134	1.4835	0.74123	0.61182	6.63412
MedEnr-OCT2015-90m7h-C742		21583	0	0	0.03495	0	0.2588	0	1.43986	3.80632
MedEnr-OCT2015-90m7h-C747		21552	0.07183	0.15815	0.06999	1.43075	3.66294	0.88056	0.95528	3.36537
MedEnr-OCT2015-90m7h-C752		21486	0	0.10576	0.22817	0	0.64125	0	5.00801	34.0155
MedEnr-OCT2015-90m7h-C758		21438	0	0.12366	0.03518	0.49159	0.67743	0.13886	5.01922	5.33383
MedEnr-OCT2015-90m7h-C775	Thaumarchaeota	21137	0	0.05375	0.05352	0	0.28188	0	4.04315	4.95459
MedEnr-OCT2015-90m7h-C786		21028	0	0	0.0538	0.01856	0.2125	0.03539	2.3461	3.09727
MedEnr-OCT2015-90m7h-C790		20985	0.03688	0.01805	0.05391	1.50661	1.56155	0.62063	0.98109	3.93243
MedEnr-OCT2015-90m7h-C793	Cyanophage	20936	0	0	0.07205	0	0.19565	0	3.48823	3.88861
MedEnr-OCT2015-90m7h-C801		20847	0	0.0545	0.07236	0.05617	0.2858	0.0357	1.73293	4.41998
MedEnr-OCT2015-90m7h-C804		20813	0	0.03639	0.09059	0.37508	0.35783	0.05364	6.1778	3.80491
MedEnr-OCT2015-90m7h-C806	Actinobacteria	20801	0	0.10924	0.05439	0.61923	0.85929	0.30412	0.63495	3.985
MedEnr-OCT2015-90m7h-C809		20720	0	0.01828	0.0728	1.39402	1.70732	0.43102	2.08101	3.21475
MedEnr-OCT2015-90m7h-C820	Cyanophage	20569	0	0.07365	0.01834	0.45543	0.56121	0.199	3.62601	4.62365
MedEnr-OCT2015-90m7h-C829	Euryarchaeota	20457	1.07828	1.01822	1.30885	0.97309	2.31176	0.94588	0.55068	5.13738
MedEnr-OCT2015-90m7h-C830		20453	0	0.20368	0.16594	0.49618	0.54619	0	4.27333	6.8753
MedEnr-OCT2015-90m7h-C840		20301	0	0.03731	0.0743	0.26918	0.84377	0.25662	1.54992	4.7576
MedEnr-OCT2015-90m7h-C844	Actinobacteria	20233	0	0.13103	0.03728	0.03858	0.22085	0	2.1695	3.45674
MedEnr-OCT2015-90m7h-C848	Actinobacteria	20131	0	0.05644	0	0.95007	1.36882	0.62848	0.90693	8.06982
MedEnr-OCT2015-90m7h-C855		20065	1.67796	1.07586	1.10889	17.5466	20.3401	9.08722	4.18172	4.77667
MedEnr-OCT2015-90m7h-C858		20036	0	0.13231	0.01882	0.05844	0.18585	0.14858	2.21022	3.69389
MedEnr-OCT2015-90m7h-C866		19981	0	0.03791	0	0.27349	0.22364	0.07449	3.03283	3.03733
MedEnr-OCT2015-90m7h-C886		19799	0	0	0	0.19715	0.58304	0.0188	0.64746	3.51382
MedEnr-OCT2015-90m7h-C887		19799	0	0.07651	0.0381	0.76886	1.74913	1.0337	0.6867	5.70061
MedEnr-OCT2015-90m7h-C891		19783	0	0.15315	0.1525	1.14436	1.33643	0.22572	6.22455	6.86497
MedEnr-OCT2015-90m7h-C908		19497	0	0.05827	0	0.56055	0.89766	0.28628	2.80926	3.89091
MedEnr-OCT2015-90m7h-C91		55104	0	0.15807	0.08212	0.51709	0.86498	0.1283	3.36966	10.0935
MedEnr-OCT2015-90m7h-C915		19432	0	0.1754	0.13585	0.82355	0.90066	0.40214	0.87958	6.09393
MedEnr-OCT2015-90m7h-C925		19354	0	0	0	0.04034	0.26936	0.38453	0.28099	3.51813
MedEnr-OCT2015-90m7h-C931	Cyanophage	19303	0	0.07848	0.09768	0.02022	0.28937	0.05783	2.49539	5.02275
MedEnr-OCT2015-90m7h-C950		19105	0	0.09911	0.23687	0.24517	0.81862	0.05843	2.76524	5.44282
MedEnr-OCT2015-90m7h-C951		19086	0	0	0.01976	0.18406	0.05853	0.09748	1.01764	6.10746
MedEnr-OCT2015-90m7h-C960		18953	0	0.03996	0.07959	0.02059	0.27506	0	2.93089	3.00682
MedEnr-OCT2015-90m7h-C967		18854	0	0.04017	0.12001	0.10351	0.41476	0	4.3473	5.47603
MedEnr-OCT2015-90m7h-C969		18832	0	0.08044	0.04005	0.29018	0.55366	0.13832	1.89772	10.5325
MedEnr-OCT2015-90m7h-C971	Actinobacteria	18814	0	0.2013	0.10022	0.68463	0.83128	0.21756	3.88166	8.73307
MedEnr-OCT2015-90m7h-C981		18744	0	0.14143	0.02012	0.12494	0.298	0.0397	2.61125	3.39571
MedEnr-OCT2015-90m7h-C989		18664	0	0.12175	0.04041	0.14639	0.25937	0	3.10115	3.58871
MedEnr-OCT2015-90m7h-C998	Archaea	18585	0	0	0.04058	0.042	0.42076	0.08009	1.44221	5.5752
Med-Io16-70mDCM-C1		103655	3.19583	1.99125	2.3248	6.089	6.54904	5.03306	0.18738	1.50656
Med-Io16-70mDCM-C121		15683	1.70263	0.99009	1.13017	7.91451	5.03371	5.00642	1.88246	2.73712
Med-Io16-70mDCM-C127		16523	0.18737	0.1146	0.04565	0.25985	0.54088	0.31529	0.04702	0.11198
Med-Io16-70mDCM-C15	Cyanophage	61472	0	0	0	0	0	0	0	0.02408
Med-Io16-70mDCM-C152		13739	0.02817	0.02757	0.02745	0.8523	1.30097	0.54169	0.45238	0.56563
Med-Io16-70mDCM-C173		13359	0.02897	0	0	1.86996	2.59233	0.89135	0	0.55401
Med-Io16-70mDCM-C202	Cyanophage	12431	0	0	0	0.1256	0.11982	0	0	0.05954
Med-Io16-70mDCM-C239		11156	0.52034	0.23764	0.13522	2.76404	2.33653	2.56836	0.10446	0.46439
Med-Io16-70mDCM-C24	Cyanophage	31805	0	0	0	0	0.01171	0	0	0.0349
Med-Io16-70mDCM-C26	Cyanophage	30920	0	0	0	0	0.01204	0	0	0
Med-Io16-70mDCM-C263	Cyanophage	10604	0	0	0	0	0	0	0	0.0698
Med-Io16-70mDCM-C319		15854	0.04882	0.35832	0.23787	1.00942	0.63417	0.37554	0	0.09336
Med-Io16-70mDCM-C35	Cyanophage	28056	0	0	0	0	0	0	0	0
Med-Io16-70mDCM-C36	Cyanophage	27298	0	0	0	0.0286	0	0.01363	0	0.02711
Med-Io16-70mDCM-C45		24317	1.5437	0.77871	0.7444	7.60842	5.03811	4.88152	1.77318	2.25225
Med-Io16-70mDCM-C49	Cyanophage	42095	0	0	0	0.00927	0	0.00884	0	0
Med-Io16-70mDCM-C5		58934	1.63506	0.89324	0.6079	8.206	5.51607	5.17752	1.81921	2.68746
Med-Io16-70mDCM-C54	Cyanophage	21910	0	0	0	0.14252	0.18695	0.16984	0	0.03378
Med-Io16-70mDCM-C58	Cyanophage	21314	0	0	0	0	0	0	0	0
Med-Io16-70mDCM-C69	Cyanophage	20256	0	0	0	0	0	0	0	0.03654
Med-Io16-70mDCM-C78	Cyanophage	19293	0	0	0	1.65898	1.62129	0.90651	0.0604	0.47952
Med-Io16-70mDCM-C8	Cyanophage	50525	0	0	0	0.02318	0.03685	0.00736	0.00769	0.02197
Med-Io16-70mDCM-C84	Cyanophage	18719	0	0	0	0.10426	0.07957	0.11927	0.02075	0.0593
Med-Io16-70mDCM-C87	Cyanophage	18466	0	0	0	0.04228	0	0	0.06311	0.14028
Med-Io16-70mDCM-C88	Cyanophage	18432	0	0.04109	0.04092	0.04235	0.32324	0.06057	0	0.46176
Med-Io16-70mDCM-C98	Cyanophage	17447	0	0.02171	0	0	0	0	0	0
Med-Io17-3500mDeep-C421	SAR11	42312	0	0	0	0.01845	0.0528	0.01759	0.00918	0.06997
Med-Io7-70mDCM-C14	SAR11	159013	0.00243	0.00715	0.00474	0.38293	0.62058	0.19657	0.19543	0.55853
Med-Io7-77mDCM-C1130	Cyanophage	18086	0	0.12564	0.31277	0.08633	0.43237	0	6.22868	9.33012
Med-Io7-77mDCM-C1137		14655	0	0	0	0.98547	1.32129	0.76174	0.42411	0.65653
Med-Io7-77mDCM-C116		70387	0	0.02152	0.09108	1.31426	1.78816	0.45465	2.19098	4.0009
Med-Io7-77mDCM-C1203	Cyanophage	14174	0	0	0	0.02754	0.02627	0	0.05481	0.13054
Med-Io7-77mDCM-C127	Cyanophage	104365	0	0	0	0.01122	0.00357	0	0.24193	0.28012
Med-Io7-77mDCM-C1337		13081	0.11834	0.08686	0.02883	0.23871	0.5978	0.25602	0.0297	0.14145
Med-Io7-77mDCM-C1384	Cyanophage	12839	0	0	0	0.0304	0.029	0	0.42358	0.43234
Med-Io7-77mDCM-C1436	Cyanophage	12873	0	0	0	0	0.02893	0	0.45264	0.63242
Med-Io7-77mDCM-C1480		14801	0	0.02559	0.10192	0.63292	0.60381	0.90508	1.3385	1.12509
Med-Io7-77mDCM-C185		46659	0.01659	0.07305	0	5.73872	3.71905	2.29684	0.04163	1.07069
Med-Io7-77mDCM-C1879		11728	0	0	0	2.09673	1.90506	1.20569	0.16561	0.85193
Med-Io7-77mDCM-C19	Cyanophage	131009	0	0.00289	0	0.03575	0.05969	0.04545	0	0.01695
Med-Io7-77mDCM-C1934		10373	0	0	0	0	0.0718	0.07175	1.27325	1.74806
Med-Io7-77mDCM-C1935		10370	0.29855	0.14608	0	0.60224	1.185	0.75355	1.04887	0.96349
Med-Io7-77mDCM-C2168		10576	0	0.03581	0	4.72405	4.99975	1.54812	0	0.94473
Med-Io7-77mDCM-C2247		11320	0.71791	0.36801	0.19989	3.86187	2.59874	2.46541	2.608	3.23633
Med-Io7-77mDCM-C226	Cyanophage	37429	0	0	0	0	0	0.00994	0.01038	0
Med-Io7-77mDCM-C23	Cyanophage	143563	0	0	0	0.00272	0.0026	0	0.01353	0.0232
Med-Io7-77mDCM-C26	Cyanophage	133407	0	0	0	0.00293	0.00558	0.00279	0.01165	0.00832
Med-Io7-77mDCM-C264	Cyanophage	33417	0	0	0	0	0	0	0.0465	0.08859
Med-Io7-77mDCM-C281	Cyanophage	57051	0	0	0	0	0.00653	0	0.17703	0.18162
Med-Io7-77mDCM-C29	Cyanophage	145822	0.00796	0.0052	0.02069	0.00536	0.00511	0.01021	0.02131	0.01015
Med-Io7-77mDCM-C311	Cyanophage	69099	0	0	0.00546	0.0113	0.01078	0	0.01124	0
Med-Io7-77mDCM-C388	Cyanophage	26837	0	0	0	0	0	0	0	0
Med-Io7-77mDCM-C401	SAR11	26103	0	0.05804	0.05779	1.73458	1.48363	0.42767	2.90192	3.31734
Med-Io7-77mDCM-C445		24910	0.06214	0.09122	0.03028	2.31907	2.66089	1.49383	2.93174	2.76315
Med-Io7-77mDCM-C45	Cyanophage	119966	0	0	0	0	0.01552	0	0	0.00617
Med-Io7-77mDCM-C460	Cyanophage	24022	0	0	0	0	0.0155	0	0	0
Med-Io7-77mDCM-C526	Cyanophage	42897	0	0	0.01758	0	0	0	0.31694	0.20704
Med-Io7-77mDCM-C571		21440	0.01805	0.05299	0.03518	0.81924	1.00736	0.50332	0.45295	0.65588
Med-Io7-77mDCM-C60	Cyanophage	76983	0	0.00984	0	0.05577	0.02902	0	0.12615	0.1346
Med-Io7-77mDCM-C697		22829	1.42394	0.81288	0.84248	7.36913	5.49698	5.0041	1.65054	2.46389
Med-Io7-77mDCM-C776	Cyanophage	18356	0.06325	0.10316	0	0.85056	0.77088	0.38517	0.44441	0.78623
Med-Io7-77mDCM-C784		23658	0.06543	0.33617	0.22317	0.90742	0.7083	0.40895	0	0.07821
Med-Io7-77mDCM-C813		17956	0	0.04218	0.06301	0.78256	1.38946	0.37302	0.90862	0.96862
Med-Io7-77mDCM-C86	Cyanophage	61786	0	0	0	0	0	0	0.15089	0.09583
Med-Io7-77mDCM-C88	Cyanophage	60699	0	0	0	0.00643	0	0	0	0.01219
Med-Io7-77mDCM-C885		16934	0.11426	0.76039	0.82398	3.73406	4.35398	1.99966	14.1077	30.5064
Med-Io7-77mDCM-C956		34894	1.73011	1.02022	0.68087	7.78546	5.3038	5.21473	1.681	2.76793
Med-OCT2015-1000m-C1934	Archaea	9649	0	0	0	0	0	0	0	0
Med-OCT2015-15m-C1122	Cyanophage	23330	3.89811	2.38628	2.05288	0	0	0.0957	0	0.03172
Med-OCT2015-15m-C1194		22625	5.47346	3.16368	1.90017	0.20702	0.85585	0.2796	0.37773	0.75237
Med-OCT2015-15m-C130		61881	5.74098	0.11628	0.23158	0	0	0	0.01255	0.01794
Med-OCT2015-15m-C141		59724	12.4863	6.63921	6.39009	0.02614	0	0.24299	0.01301	0.00619
Med-OCT2015-15m-C148		58094	4.74962	2.55548	2.25255	0.59126	0.72432	0.82629	0.16717	0.27391
Med-OCT2015-15m-C16		142663	4.57077	1.22114	1.24769	0	0	0.0313	0.00817	0
Med-OCT2015-15m-C1609	Cyanophage	18943	4.474	1.91929	2.5084	0	0	0.03929	0	0.01954
Med-OCT2015-15m-C165		56255	4.20321	4.01913	2.86248	0.00694	0.04633	0.25797	0	0.00658
Med-OCT2015-15m-C1694		18350	3.62738	2.35281	1.62355	0.10636	0.10146	0.30418	0	0
Med-OCT2015-15m-C176	Cyanophage	55585	8.86977	5.05551	5.31905	0.02107	0	0.22092	0	0.01331
Med-OCT2015-15m-C179		55096	9.37696	5.21036	5.5716	0.02125	0	0.24314	0.00705	0.00672
Med-OCT2015-15m-C18		138459	7.9713	0.07659	0.27509	0.00282	0	0.00537	0.00561	0
Med-OCT2015-15m-C1837		17483	8.43354	5.06896	5.58675	0	0	0.14899	0	0
Med-OCT2015-15m-C1850		17386	5.31984	4.29127	2.58121	0	0.02142	0.21403	0.02234	0.08514
Med-OCT2015-15m-C1882		17140	4.22213	2.01071	1.62816	8.63087	6.75664	6.88213	0.61192	1.7272
Med-OCT2015-15m-C1913		17017	3.16106	0.37834	0.22161	0.02294	0	0	0	0
Med-OCT2015-15m-C2034		16485	4.46031	1.76897	2.31051	0.02368	0.02259	0.13544	0	0
Med-OCT2015-15m-C2059		16391	5.54834	3.11923	3.58918	0	0	0.13621	0	0
Med-OCT2015-15m-C242	Cyanophage	48142	5.99674	3.1231	3.3292	2.85394	2.76911	2.88309	0.04034	0.70718
Med-OCT2015-15m-C2441		14752	3.62017	2.82397	3.11878	0.02646	0	0.05045	0	0
Med-OCT2015-15m-C2814		13543	2.88607	2.18121	2.03275	0	0	0	0	0
Med-OCT2015-15m-C2834		13506	7.9083	4.65479	5.19352	0	0	0.13776	0.02876	0
Med-OCT2015-15m-C2886		13376	3.67433	3.31267	3.496	2.21775	1.7817	2.08646	0.20329	0.58098
Med-OCT2015-15m-C2998		13098	4.13641	1.64812	1.09409	0	0	0.05682	0	0
Med-OCT2015-15m-C3011		13071	5.00356	3.47689	4.29886	3.5237	7.49253	5.89299	0.11888	0.7644
Med-OCT2015-15m-C3035		13021	4.51752	1.57061	1.85358	1.67868	1.11532	1.31458	1.10382	1.25047
Med-OCT2015-15m-C3132		12729	4.68196	2.40996	2.19237	0.21465	0.43881	0.3508	0.09155	0.407
Med-OCT2015-15m-C3378		12174	4.48215	2.48872	1.82765	1.21836	1.13175	1.16152	0.28718	0.45595
Med-OCT2015-15m-C347		42072	4.08405	2.27744	1.93614	0.06494	0.24783	0.27418	0.01847	0.06157
Med-OCT2015-15m-C356		41737	5.33147	4.6731	4.96052	0	0	0.13373	0.01861	0.00887
Med-OCT2015-15m-C3592		11677	2.4856	1.81625	1.67938	0.76881	0.57401	0.89228	0.33267	0.38029
Med-OCT2015-15m-C3603		11659	4.01629	2.76107	2.10246	0.20087	0.54296	0.28725	0.06664	0.41262
Med-OCT2015-15m-C3638		11596	4.70557	4.86628	4.71558	4.4095	4.55996	5.58361	0.26799	1.11693
Med-OCT2015-15m-C3680		11512	4.26927	2.20416	1.17931	2.27169	2.55539	3.03844	0.30369	0.70719
Med-OCT2015-15m-C3693		11480	4.82053	3.13401	1.74104	0.102	0.42168	0.32414	0.2707	0.29011
Med-OCT2015-15m-C3733		11405	3.18958	2.88897	1.91782	0.03422	0	0.09788	0	0.19468
Med-OCT2015-15m-C3735		11403	2.6132	0.96316	0.99215	0	0.09797	0.06526	0	0
Med-OCT2015-15m-C3808		11285	2.2976	2.65121	1.63746	0	0	0.06595	0	0.03279
Med-OCT2015-15m-C3834		11230	3.96295	3.43985	3.82825	0	0	0.03314	0	0
Med-OCT2015-15m-C3985		10915	3.43913	2.67169	4.11149	0	0	0.17046	0	0
Med-OCT2015-15m-C4058		10806	3.4022	1.78741	1.98923	4.98471	4.06629	4.37334	0.71896	2.02047
Med-OCT2015-15m-C4518		10166	4.14932	3.72536	4.15474	0.0384	0.07326	0.40264	0	0.0364
Med-OCT2015-15m-C4563		10107	6.77722	6.63239	5.4103	0.30895	0.95793	0.95725	0	0.2563
Med-OCT2015-15m-C458		37185	5.96331	2.98414	2.82952	0.13646	0.27038	0.76053	0.03134	0.05971
Med-OCT2015-15m-C4608		10045	3.12058	1.65891	1.08874	0	0	0	0	0
Med-OCT2015-15m-C4631		10018	4.94458	2.49506	1.91984	0	0	0.11143	0	0
Med-OCT2015-15m-C467		36932	5.21828	3.29171	3.47178	0.77152	0.77637	1.09824	0.03155	0.24048
Med-OCT2015-15m-C476		36547	4.87087	2.38339	2.30106	0	0	0.09164	0.01063	0.01012
Med-OCT2015-15m-C481		36322	4.17655	2.63797	2.76177	0.01075	0.01025	0.12294	0	0
Med-OCT2015-15m-C497		35522	6.58022	5.50137	3.06814	0.05494	0.41932	0.14666	0.14216	0.5313
Med-OCT2015-15m-C508		34924	3.70103	2.7761	1.49015	0.02235	0.03199	0.14917	0.03337	0.08477
Med-OCT2015-15m-C551		33781	8.45444	7.4105	7.10003	0.03466	0	0.44062	0	0.01095
Med-OCT2015-15m-C642		30980	8.28195	7.99494	7.75414	0	0	0.24023	0	0.02389
Med-OCT2015-15m-C65		80390	5.06905	2.50627	2.11099	0.57779	0.64386	0.98131	0.12563	0.29
Med-OCT2015-15m-C659		30655	3.13077	1.13659	1.05797	0	0	0.02428	0	0
Med-OCT2015-15m-C662	SAR11	30619	4.3857	1.84295	2.67266	0.01275	0	0.08507	0	0
Med-OCT2015-15m-C745		28824	5.43753	2.48329	2.56435	0.52812	0.37465	1.03278	0.14825	0.12838
Med-OCT2015-15m-C80		76109	3.70674	2.63232	2.43784	0	0	0.10756	0.01021	0.00486
Med-OCT2015-15m-C814		27757	4.40571	2.22399	1.72547	9.92792	7.76761	8.28495	0.79771	2.15977
Med-OCT2015-15m-C927		26099	5.41215	2.33626	2.80319	0.59822	0.25682	0.67011	0.14884	0.05671
Med-OCT2015-15m-C935		26018	3.76312	1.57206	1.52192	0.28504	0.20037	0.35755	0	0.05689
Med-OCT2015-15m-C958		25463	3.41959	1.79968	1.1404	0	0.08775	0.17537	0	0
Med-OCT2015-30m-C1		164871	1.15719	0.75803	0.61072	0.44745	0.34105	0.39046	0.07775	0.1818
Med-OCT2015-30m-C1053		14468	1.79212	1.17794	1.06869	0.08093	0	0.10288	0	0
Med-OCT2015-30m-C1063		14404	2.06875	0.73619	1.49234	0.43357	0.43949	1.47253	0	0.25691
Med-OCT2015-30m-C1065		14386	0.37661	1.57954	1.17964	0.02713	0.3365	0.38799	0	0.07717
Med-OCT2015-30m-C107		40708	1.81574	1.18152	0.90787	0.00959	0	0.01828	0.00954	0.00909
Med-OCT2015-30m-C1074	Cyanophage	14342	0.08095	0.21125	0.10518	2.83041	2.70026	2.20538	0.29794	0.61925
Med-OCT2015-30m-C1083		14273	2.22331	1.69818	1.18898	0	0	0.02607	0	0
Med-OCT2015-30m-C1116		14080	0.49473	0.59175	0.42854	0.16633	0.63473	0.84571	0	0.15769
Med-OCT2015-30m-C116		39525	2.47713	1.1594	1.15449	0.81966	0.83849	1.04502	0.13759	0.15916
Med-OCT2015-30m-C1186		13629	1.5901	0.72249	1.10681	3.29352	1.99453	1.72009	0.51304	1.00462
Med-OCT2015-30m-C1187		13628	2.07296	1.08381	0.83017	0.97381	1.61213	1.61099	0	0.27154
Med-OCT2015-30m-C1205		13543	0.60008	0.44743	0.41769	1.87337	2.08968	1.70353	0	0.49184
Med-OCT2015-30m-C1265		13217	2.22526	1.57597	1.36957	0	0.08452	0.11262	0	0
Med-OCT2015-30m-C1281	SAR11	13151	0.26484	0.20159	0.05735	1.60273	1.04767	0.82057	0	0.59092
Med-OCT2015-30m-C1286		13129	0.20633	0.375	0.34469	0.08919	0.2269	0.17006	0	0.08456
Med-OCT2015-30m-C129		37918	0.39804	0.44945	0.31826	0.04118	0.10803	0.34347	0	0.0488
Med-OCT2015-30m-C1352		12824	1.78045	0.41345	0.38229	1.0653	0.75497	1.79904	0	0.28856
Med-OCT2015-30m-C1353		12821	2.29399	1.53603	1.4707	0	0	0.02902	0	0
Med-OCT2015-30m-C1360		12768	0.75774	0.59324	0.56119	0.09171	0.32081	0.40802	0	0.08695
Med-OCT2015-30m-C1368		12739	2.15687	0.86215	1.33215	0.82729	0.9354	1.48973	0.18296	0.34859
Med-OCT2015-30m-C1386		12647	0.0306	0.6588	0.38764	0.98761	0.70665	0.41192	0.06143	0.02926
Med-OCT2015-30m-C1387		12646	2.29514	2.09635	1.25248	1.04943	2.20846	2.17747	0.12287	0.76083
Med-OCT2015-30m-C1391		12623	0.27592	0.12001	0.17925	0.21645	0.531	0.85489	0	0.08795
Med-OCT2015-30m-C1511		12164	0.6681	0.43588	0.34103	0.54551	1.28574	1.0401	0	0.15211
Med-OCT2015-30m-C1513		12141	0.60562	0.43671	0.43486	0.96448	0.70543	1.19532	0.032	0.03048
Med-OCT2015-30m-C1515		12141	2.00811	0.59268	0.68335	0.77158	1.04281	0.39844	0.12798	0.33528
Med-OCT2015-30m-C1542		12025	4.53769	2.33059	1.81894	1.00624	1.08384	1.08307	0.32304	0.43083
Med-OCT2015-30m-C159		34870	14.0502	5.02861	5.37502	0.13433	0.13883	0.49089	0	0.01061
Med-OCT2015-30m-C1634	Cyanophage	11699	0.6285	0.12949	0.0967	0.03336	0.06366	0.31807	0	0.06326
Med-OCT2015-30m-C1656		11613	1.16634	1.69581	1.42884	0.10083	0.06413	0.06409	0.03345	0
Med-OCT2015-30m-C1659		11603	2.76827	1.69727	1.9501	0.20184	0.19256	0.25656	0	0.03189
Med-OCT2015-30m-C167		33936	0.39912	0.21204	0.31115	0.09202	0.2414	0.27413	0	0.07633
Med-OCT2015-30m-C1672		11559	1.27222	0.75357	0.55463	0	0	0	0	0
Med-OCT2015-30m-C1689		11478	0.77546	0.36295	0.2957	0.06801	0.29198	0.45387	0	0.12896
Med-OCT2015-30m-C172		33322	2.16014	1.22747	1.27886	1.12452	0.91636	1.37356	0.10492	0.38869
Med-OCT2015-30m-C1728		11356	1.94245	1.26729	1.09588	8.14608	7.14846	5.99653	8.92803	7.82079
Med-OCT2015-30m-C1732		11349	1.87545	1.66852	1.46208	0.03439	0.55779	0.75413	0.03423	0.19564
Med-OCT2015-30m-C1744		11309	0.20532	0.20093	0.06669	0.10355	0.16464	0.65808	0	0.03272
Med-OCT2015-30m-C1755		11259	1.3405	0.80729	0.97135	0.20801	0.36381	0.66101	0	0
Med-OCT2015-30m-C178		32944	0.92801	0.44834	0.30907	0.27251	0.44083	0.4857	0	0.14603
Med-OCT2015-30m-C18		80382	5.00697	2.48767	2.12058	0.55357	0.6254	0.95363	0.13048	0.29924
Med-OCT2015-30m-C180		32841	1.57903	1.23392	0.94161	0	0	0.01133	0.01183	0
Med-OCT2015-30m-C184		32594	1.79283	1.04574	1.20329	0.37124	0.60551	1.34716	0	0.21572
Med-OCT2015-30m-C1843		10969	0.77617	0.5179	0.24066	0	0.44132	0.54279	0	0
Med-OCT2015-30m-C1845		10955	3.00267	2.07423	1.51466	0	0.16996	0.16984	0	0
Med-OCT2015-30m-C1877		10851	0.46363	0.31412	0.66033	2.19425	4.63282	2.67485	0	1.43233
Med-OCT2015-30m-C189		32421	2.62602	1.76388	1.38419	0	0	0.06887	0	0
Med-OCT2015-30m-C1974		10622	1.16586	0.8557	1.0651	2.93975	2.73445	2.55735	0.10971	0.38322
Med-OCT2015-30m-C214		30596	0.22767	0.13616	0.03698	0.61235	1.0832	0.60811	0	0.18142
Med-OCT2015-30m-C2151		10118	2.06538	1.16034	1.04361	0.88728	0.92008	1.10332	0	0.1463
Med-OCT2015-30m-C2176		10056	1.69328	1.05451	1.08755	0.15526	0.03703	0	0	0.0368
Med-OCT2015-30m-C2181		10047	1.38665	1.05546	0.22521	0.0777	0.14825	0.33333	0.07733	0.03683
Med-OCT2015-30m-C2195		10020	4.71187	2.1544	2.898	0.54537	0.44596	0.81701	0.07754	0
Med-OCT2015-30m-C241		28372	0.24552	0.92104	0.59813	0.48151	0.70874	0.23608	0	0.14347
Med-OCT2015-30m-C252		27794	0.29239	0.3134	0.20352	0	0.09378	0.4552	0	0.07988
Med-OCT2015-30m-C265		26969	2.19547	0.983	1.18858	0.78155	0.66276	0.77268	0.10083	0.17838
Med-OCT2015-30m-C267		26877	0.93591	0.28182	0.43497	0.08714	0.36023	0.51226	0	0.11015
Med-OCT2015-30m-C29		70200	1.30651	0.86858	0.74671	0.02224	0.03183	0.12192	0	0.02636
Med-OCT2015-30m-C299		25660	1.35733	0.95935	0.74953	0	0	0.029	0.01514	0
Med-OCT2015-30m-C305		25408	2.05619	1.3415	0.9796	0.95246	1.17247	1.39132	0.29049	0.40781
Med-OCT2015-30m-C320		24971	2.16966	1.18298	0.93634	0.2501	0.25351	0.17882	0	0.04446
Med-OCT2015-30m-C322		24819	2.66632	1.3123	1.58025	0.94361	0.8102	0.88459	0.07826	0.20874
Med-OCT2015-30m-C33		64170	1.79715	0.95019	1.0402	0.42579	0.77179	1.31634	0.01816	0.19607
Med-OCT2015-30m-C330		24662	1.9144	0.92139	0.97865	0.07913	0.52847	1.8408	0	0.10504
Med-OCT2015-30m-C34	SAR11	63844	4.88557	2.64566	2.29776	0.56858	0.83406	0.86261	0.14603	0.26663
Med-OCT2015-30m-C35		62840	2.9129	1.62722	1.9864	0.62114	0.59258	0.82902	0.02473	0.17078
Med-OCT2015-30m-C353		23932	1.97279	0.88619	1.16608	0.97858	1.24478	1.39939	0.21101	0.35564
Med-OCT2015-30m-C354	Cyanophage	23927	0.56608	0.33239	0.07881	0.14682	0.06225	0.26438	0.01623	0.09279
Med-OCT2015-30m-C378		23115	0.98778	0.6226	0.5547	0.21952	0.27386	0.32197	0	0.08005
Med-OCT2015-30m-C386		22950	1.19723	0.8086	0.39437	1.68376	6.55511	3.42116	0.89709	3.88597
Med-OCT2015-30m-C42		57593	0.75929	0.41427	0.36669	0.14232	0.78881	2.91394	0	0.21204
Med-OCT2015-30m-C455		21589	1.29063	0.89466	0.80353	0.01808	0.36222	0.84457	0	0.06856
Med-OCT2015-30m-C54	Cyanophage	53935	0.37311	0.1615	0.20277	0.10855	0.14499	0.22078	0.02161	0.07547
Med-OCT2015-30m-C559		19436	5.47553	2.45518	2.38657	0.56231	0.36402	0.95728	0.17988	0.17136
Med-OCT2015-30m-C565		19391	1.23735	0.48827	0.54455	0	0.13442	0.05757	0	0.09542
Med-OCT2015-30m-C623		18728	1.83907	0.91	0.70478	0	0	0	0	0
Med-OCT2015-30m-C642		18493	2.44838	1.45402	1.50904	0	0	0.10061	0	0
Med-OCT2015-30m-C646		18422	3.23508	1.08957	1.4125	1.03821	0.84897	0.98977	0	0.12053
Med-OCT2015-30m-C67		50242	20.173	12.1285	13.0755	0.03885	0.04447	0.57029	0.00773	0.0221
Med-OCT2015-30m-C670		18050	1.97247	1.11203	1.27447	1.27585	1.67105	1.07201	0.10761	0.38953
Med-OCT2015-30m-C672		18028	1.05184	0.54619	0.58571	0.08661	0.28918	0.63987	0.06464	0.12316
Med-OCT2015-30m-C675		17998	0.79557	0.44189	0.18858	0.19519	0.24828	0.76498	0	0.20561
Med-OCT2015-30m-C689		17865	2.92437	1.88671	2.2798	0.54621	0.5211	0.95814	0	0.08286
Med-OCT2015-30m-C69	Cyanophage	49973	3.67066	1.87947	1.41118	0	0.0298	0.06702	0	0
Med-OCT2015-30m-C698		17779	2.76438	2.44968	2.75748	0.10977	0.12567	0.89998	0	0.45791
Med-OCT2015-30m-C74		48962	1.24091	0.99008	0.91657	0.03986	0.06084	0.152	0	0.03023
Med-OCT2015-30m-C753		17275	13.9563	5.12999	4.628	0.15816	0.06467	0.36619	0	0.06426
Med-OCT2015-30m-C76		48762	1.30155	0.93977	0.76565	0.02401	0.01527	0.07631	0	0.01518
Med-OCT2015-30m-C794		16760	0.50798	0.40674	0.27001	0.18631	0.28884	0.73268	0.04635	0.15456
Med-OCT2015-30m-C82	Cyanophage	46823	0.41325	0.19412	0.17719	0.13338	0.15906	0.14305	0.04978	0.06323
Med-OCT2015-30m-C858		16124	1.77607	0.61069	1.26298	2.37235	1.6628	2.12319	0.2891	0.84917
Med-OCT2015-30m-C888		15850	0.09766	0.09558	0.04758	1.15743	2.2554	0.96256	0.02451	0.53699
Med-OCT2015-30m-C903		15677	2.71538	1.93262	2.88665	3.5853	4.13302	4.22504	0.99115	2.17165
Med-OCT2015-30m-C91		44225	2.5289	1.34447	1.10854	0.80316	0.9262	1.6744	0.11419	0.25103
Med-OCT2015-30m-C911		15593	0.37227	0.43718	0.24185	0	0.21493	0.62046	0	0.26105
Med-OCT2015-30m-C930		15359	0.32755	0.27124	0.3683	2.61758	2.08505	1.76862	0	0.26503
Med-OCT2015-30m-C943		15236	0.0508	0.14914	0.07425	0.10248	0.24441	0.29308	0	0.07286
Med-OCT2015-30m-C974		15056	1.56791	1.13193	0.95181	1.03699	1.31083	1.80421	0.1548	0.31952
Med-OCT2015-30m-C98	Cyanophage	42233	0.56812	0.14348	0.23216	0.13863	0.14989	0.2379	0	0.09638
Med-OCT2015-30m-C982		14958	1.06075	0.37978	0.30254	0.07828	0.07468	0.59705	0.02597	0
Med-OCT2015-75m-C1033		16357	0	0.48622	0.23055	0.95452	1.13828	0.1365	17.9064	14.3886
Med-OCT2015-75m-C1204	Thaumarchaeota	15273	0	0.17358	0.14815	0.71558	1.0484	0.41419	5.18856	8.23796
Med-OCT2015-75m-C1263		14958	0	0.10128	0.02521	0.4958	0.59747	0.14926	3.50591	4.82421
Med-OCT2015-75m-C1270		14937	0.12954	0	0	1.51562	0.82268	0.17438	3.19877	3.81524
Med-OCT2015-75m-C1324		14643	0.66071	0.36209	0.20603	3.43863	2.82276	1.93133	2.59978	3.26005
Med-OCT2015-75m-C1497		13722	0.08461	0	0	0.39823	0.40706	0	1.50037	2.48105
Med-OCT2015-75m-C1592		13349	4.55147	1.92921	1.75153	4.18132	3.40324	3.73534	2.619	2.77215
Med-OCT2015-75m-C1623		13236	0	0.14307	0.05698	1.1501	0.64707	0.05623	1.52612	1.03445
Med-OCT2015-75m-C1740		12781	1.48365	0.94821	1.03271	17.0715	16.1991	7.22039	3.1001	4.40092
Med-OCT2015-75m-C197		39142	0	0.05805	0.07708	0.21939	0.52324	0.10457	5.96448	4.10309
Med-OCT2015-75m-C1971		11970	0.16165	0.44295	0.15753	2.83695	2.36429	1.08805	1.84978	3.18426
Med-OCT2015-75m-C2007		11863	0.03262	0	0	1.05289	1.25559	1.19197	1.83373	1.18537
Med-OCT2015-75m-C2023		11797	0	0.16052	0.22377	0.06617	0.50505	0	6.7503	11.1672
Med-OCT2015-75m-C2137		11493	0	0.03295	0.09844	1.18867	2.78642	0.84181	5.03609	5.76348
Med-OCT2015-75m-C2188		11358	0	0.10003	0.23242	0.37802	1.08192	0.09829	2.63348	5.44101
Med-OCT2015-75m-C2226		11259	0.51558	0.20182	0.33495	8.14693	13.924	14.5091	3.69169	5.91613
Med-OCT2015-75m-C2390		10796	1.2546	0	0	1.77157	1.48316	0.37915	2.66262	4.21606
Med-OCT2015-75m-C243	Thaumarchaeota	35781	0	0.44455	0.40051	1.6254	1.23844	0.1248	6.79615	10.942
Med-OCT2015-75m-C2451	Thaumarchaeota	10663	0	0.14207	0.17683	0.73211	0.90798	0.24428	5.46453	5.62212
Med-OCT2015-75m-C2539		10484	0	0.07225	0.10791	0.03723	0.31967	0	2.81597	5.36514
Med-OCT2015-75m-C256		34778	0	0.96918	0.02169	0.06734	0.12849	0	0.60316	5.05422
Med-OCT2015-75m-C2568		10414	0.07432	0.14547	0.18106	4.34777	7.61629	5.96724	4.88646	5.22353
Med-OCT2015-75m-C2717	Archaea	10136	0	0.29891	0.03721	0.84719	0.80823	0.2937	3.79411	9.71135
Med-OCT2015-75m-C2837	Archaea	9921	0	0.03818	0.07602	0.55081	1.01342	0.15003	4.77689	9.99641
Med-OCT2015-75m-C304		32170	0.21653	0.15304	0.1055	2.4509	3.10216	1.14514	4.80588	6.51074
Med-OCT2015-75m-C308		32134	0	0.33	0.08215	0.52231	0.89229	0.10422	3.77164	6.04588
Med-OCT2015-75m-C3577	Thaumarchaeota	8743	0	0.12995	0.21567	1.33933	0.93701	0.17025	3.55443	6.89909
Med-OCT2015-75m-C360		29026	0.01333	0.33924	0.05197	1.92298	0.75691	0.29486	1.43198	2.26933
Med-OCT2015-75m-C37		82209	0.0659	0.24877	0.21102	5.96818	4.59757	1.67025	5.10796	7.44078
Med-OCT2015-75m-C375		28395	0.01363	0.05335	0.06641	0.37115	0.39342	0.11794	6.27931	3.68816
Med-OCT2015-75m-C455		25285	0.07653	0.11982	0.08949	0.91078	0.98672	0.94187	1.95111	1.50744
Med-OCT2015-75m-C4732	Thaumarchaeota	7505	0	0.30278	0	0.78013	0.94272	0.34707	4.76187	10.897
Med-OCT2015-75m-C501		23990	0	0.39466	0.39299	0	0.49671	0	2.28313	6.23183
Med-OCT2015-75m-C52		71782	0.02156	0.6806	0.61468	2.42519	3.02436	0.94866	17.7987	16.4916
Med-OCT2015-75m-C536		23114	0	0.213	0.16316	0.59104	0.80552	0.09659	3.91581	4.69091
Med-OCT2015-75m-C542		23049	0.03358	0.21361	0.08181	2.52325	3.48966	1.93733	3.23586	3.17891
Med-OCT2015-75m-C65	Thaumarchaeota	65977	0	0.4707	0.40011	1.29562	2.86152	0.32148	17.1333	32.2171
Med-OCT2015-75m-C678	Cyanophage	20485	0	0.11093	0.14728	0.47636	0.9089	0.10899	4.15288	7.38843
Med-OCT2015-75m-C7	Euryarchaeota	134299	0.01441	0.42582	0.17691	2.26989	5.18224	0.77028	9.26167	24.4022
Med-OCT2015-75m-C754		19466	0	0.19456	0.01937	6.71729	1.97034	1.20431	3.03325	1.4828
Med-OCT2015-75m-C78		60245	0.01285	0.16344	0.16901	0.48592	1.0755	0.19148	12.625	11.4066
Med-OCT2015-75m-C788		19036	0	0.13926	0.09905	0.4511	0.46948	0.05864	3.89761	5.0932
Med-OCT2015-75m-C794		18900	0.59379	0.34065	0.33921	9.02497	17.4169	17.1684	4.56281	7.73393
Med-OCT2015-75m-C800		18821	0	0.24147	0.10018	0.45625	0.57377	0.17794	4.06597	8.29726
Med-OCT2015-75m-C89		55505	0	0.19787	0.18344	0.28129	0.81177	0.08045	4.67504	9.16717
Med-OCT2015-75m-C904		17656	0	0.2145	0	7.14062	1.43416	0.67442	3.10218	0.83836
Med-OCT2015-75m-C947		17163	0	0.0662	0.21973	0.50033	0.5858	0.02168	4.36822	7.02893
Med-OCT2015-90m-C1	Euryarchaeota	139890	0.01383	0.4088	0.18601	2.26008	5.19074	0.76875	9.21363	24.2973
Med-OCT2015-90m-C1027	Thaumarchaeota	16137	0	0.14082	0.04674	0.91915	1.2461	0.27671	4.67003	8.16379
Med-OCT2015-90m-C1038	Thaumarchaeota	16050	0	0.09438	0.23496	0.46207	0.51042	0.06956	4.59854	4.7496
Med-OCT2015-90m-C1205	Thaumarchaeota	14725	0	0.10288	0.02561	0	0.15173	0	4.27367	4.37279
Med-OCT2015-90m-C1256		14448	0	0	0.0522	0.05403	0.30928	0	3.3608	2.7918
Med-OCT2015-90m-C1275		14316	0	0.23809	0.15805	1.71769	1.56067	0.3379	8.1403	7.23771
Med-OCT2015-90m-C1279		14308	0	0.37057	0.10543	0.70929	0.59859	0.15605	4.01813	5.22441
Med-OCT2015-90m-C1283		14280	0.4607	0.31825	0.21127	7.95409	12.6733	13.7067	3.78118	6.11573
Med-OCT2015-90m-C1337		13994	0.05531	0.08119	0.0539	0.30681	0.29271	0.02659	4.49691	2.90881
Med-OCT2015-90m-C1362		13878	0	0.02729	0.13587	0.42188	0.42931	0.02681	6.54983	3.75974
Med-OCT2015-90m-C1437	Thaumarchaeota	13497	0	0.08418	0.19558	0.66514	1.51742	0.11028	3.59761	5.26416
Med-OCT2015-90m-C149		39168	0.01976	0	0.04814	1.17592	1.74931	0.17101	8.33084	11.8476
Med-OCT2015-90m-C1516	Thaumarchaeota	13132	0	0.05768	0	0	0.25521	0	4.55544	3.55062
Med-OCT2015-90m-C1522		13095	0	0.02892	0.37438	0	0.51186	0	3.64872	10.8233
Med-OCT2015-90m-C1553	Cyanophage	12983	0	0.20419	0.20333	0.51109	0.91782	0.14331	4.63765	7.89532
Med-OCT2015-90m-C1558	Thaumarchaeota	12957	0	0	0.08732	0	0.31613	0	5.00672	6.85444
Med-OCT2015-90m-C1564		12938	0	0.02927	0	0.27152	0.23025	0.11505	2.91236	2.86021
Med-OCT2015-90m-C1916		11604	0	0.09791	0.0975	0.2691	0.96271	0.12827	4.75359	7.71743
Med-OCT2015-90m-C2064		11190	0	0	0	0	0.2995	0	3.57559	2.77788
Med-OCT2015-90m-C2087		11135	0	0.17006	0.13547	0.38559	0.76916	0.03342	4.7096	5.78261
Med-OCT2015-90m-C2118		11047	0	0.41139	0	1.69599	1.51687	0.4379	7.73605	8.03955
Med-OCT2015-90m-C2409		10292	0	0	0	0.1517	0.10854	0.14462	3.32142	2.40902
Med-OCT2015-90m-C2418	Thaumarchaeota	10273	0	0.03686	0.11013	0.18997	0.61621	0	4.65102	4.4307
Med-OCT2015-90m-C27		69009	0	0.06037	0.0929	0.22624	0.45327	0.0701	6.13004	3.86093
Med-OCT2015-90m-C2863	Thaumarchaeota	9408	0	0.08051	0.04008	0.66382	0.39581	0.27687	4.41802	8.14213
Med-OCT2015-90m-C291		29595	0	0.06398	0.43325	0	0.22648	0.01257	4.33148	13.9419
Med-OCT2015-90m-C32	Thaumarchaeota	65978	0	0.46495	0.40011	1.28968	2.85019	0.32148	17.1919	32.2951
Med-OCT2015-90m-C327		28342	0.05462	0.34743	0.42579	1.18439	1.68175	0.23633	17.1736	14.0229
Med-OCT2015-90m-C328	Thaumarchaeota	28318	0	0	0.11986	0	0.32874	0	4.44451	6.05039
Med-OCT2015-90m-C332	Thaumarchaeota	28211	0	0.24164	0.12031	0.59494	1.01637	0.23743	5.41147	10.7431
Med-OCT2015-90m-C364		27199	0.04269	0.71013	0.58233	2.75533	3.77866	1.02608	18.5665	18.4353
Med-OCT2015-90m-C430		25043	0	0.18148	0.13553	0.48317	0.92191	0.10401	4.40527	7.92033
Med-OCT2015-90m-C646		20475	0	0.07399	0.07367	0.24782	0.9639	0.09087	3.03555	6.95828
Med-OCT2015-90m-C703		19423	0.71728	0.52646	0.33007	9.46522	18.9227	17.3958	5.97992	7.37326
Med-OCT2015-90m-C75		49962	0.01549	0.0758	0.10567	0.29687	0.37266	0.08937	6.15003	4.23663
Med-OCT2015-90m-C784	Archaea	18481	0	0.2664	0.14284	0.23233	0.80597	0.06041	3.6153	13.8162
Med-OCT2015-90m-C869	Archaea	17669	0	0.23578	0.32015	1.36964	1.36988	0.40014	4.46298	11.9798
Med-OCT2015-90m-C902		17340	0	0.08736	0.21748	0.49522	0.57982	0.02146	4.39084	7.14925
Med-OCT2015-90m-C911		17250	0.35895	0	0.02186	1.96859	1.42474	0.23729	4.54886	4.59081
Med-OCT2015-90m-C956	Archaea	16746	0	0.22616	0.18016	0.46617	1.71222	0.26665	4.5002	11.8445
Med-SEP2014-15m-C1042		18806	2.48995	1.95341	2.30609	0	0	0.07915	0	0
Med-SEP2014-15m-C1086		18440	1.00735	0.41076	0.79759	0.52918	0.42407	0.70629	0.46345	0.4415
Med-SEP2014-15m-C1087		18431	11.8002	6.2466	6.32245	0.12707	0.28285	0.42398	0	0.08031
Med-SEP2014-15m-C12		142788	19.0639	9.86666	10.1392	0.42371	0.53983	1.0763	0.31286	0.44835
Med-SEP2014-15m-C1246		17185	6.0126	2.0936	3.0064	1.63534	2.05852	2.03541	0.33906	0.64601
Med-SEP2014-15m-C1334		16385	4.77096	2.95857	1.97937	0.07146	0.38635	0.2271	0.14225	0.97115
Med-SEP2014-15m-C134	Cyanophage	56261	0.11693	0.1279	0.2346	0.17344	0.07281	0.10583	0.08976	0.30256
Med-SEP2014-15m-C1518	Cyanophage	15122	0	0	0	0	0	0	0	0
Med-SEP2014-15m-C1558		14908	5.42535	2.6674	2.30196	0.10473	0.52454	0.29953	0.1824	0.7695
Med-SEP2014-15m-C1667	Cyanophage	14244	0	0	0	0	0	0	0	0
Med-SEP2014-15m-C1691	Cyanophage	14128	1.91742	0.80419	0.90756	0.60781	0.31629	0.26338	0.16497	0.39289
Med-SEP2014-15m-C1715		14026	9.96034	8.64042	8.57694	0	0	0.34489	0	0.05277
Med-SEP2014-15m-C1723	Cyanophage	13994	0	0	0	0	0	0	0	0
Med-SEP2014-15m-C174	Cyanophage	48322	0.22424	0.09405	0.12487	0	0	0	0	0
Med-SEP2014-15m-C1825	Cyanophage	13513	0	0	0	0	0	0	0	0
Med-SEP2014-15m-C2020		12752	1.03181	0.83157	0.41402	0.06122	0.11681	0.02918	0	0.08706
Med-SEP2014-15m-C2116		12408	4.83427	2.62492	2.76577	0.15729	0.39014	0.32989	0.12523	0.38771
Med-SEP2014-15m-C2309		11747	4.57919	2.54694	2.69667	0.06646	0.1902	0.50684	0	0
Med-SEP2014-15m-C2482	Cyanophage	11275	0	0	0	0	0	0	0	0
Med-SEP2014-15m-C2495		11241	6.98863	4.17768	4.26064	1.59727	1.39131	2.01929	0.27646	0.46088
Med-SEP2014-15m-C2668	Cyanophage	10762	0	0	0	0	0	0	0	0
Med-SEP2014-15m-C2737		10614	2.36993	1.46293	1.70545	0.69872	0.66659	0.596	0.36598	0.55783
Med-SEP2014-15m-C2837	SAR11	10363	0	0	0	0	0	0	0	0
Med-SEP2014-15m-C3007		10034	1.00277	1.66072	1.27785	0.1167	0.51956	0.48211	0.15485	0.11064
Med-SEP2014-15m-C470		29300	1.49249	0.96942	0.82374	0.23979	0.29231	0.3302	0.05303	0.13893
Med-SEP2014-15m-C508		27407	0.18356	0.09673	0.05504	0	0	0	0	0.0135
Med-SEP2014-15m-C595		25404	2.14792	1.10319	1.02429	0	0	0.05859	0	0
Med-SEP2014-15m-C65	Cyanophage	76344	1.53085	0.67962	0.6965	0.16361	0.08292	0.19984	0.11194	0.27629
Med-SEP2014-15m-C908		20105	12.1073	9.71996	8.89098	0	0.01852	0.46271	0	0.03681
Med-SEP2014-30m-C1	Cyanophage	188425	1.15219	0.77181	0.61043	0.4578	0.33794	0.4009	0.07628	0.18854
Med-SEP2014-30m-C1129		14481	8.28445	3.42603	4.21883	2.2372	1.36288	2.2613	0.1073	0.38332
Med-SEP2014-30m-C1193		14024	23.4005	11.8013	14.2252	0.11133	0.23898	1.03483	0	0.13194
Med-SEP2014-30m-C1233		13712	0.19756	0.19334	0.24752	4.09909	3.04158	2.79519	0.42494	0.48578
Med-SEP2014-30m-C1234		13675	1.24516	1.32933	1.73736	0	0.02723	0.08163	0	0
Med-SEP2014-30m-C124		48794	1.90347	1.04782	1.00474	0.99993	1.49579	1.01428	0	0.26544
Med-SEP2014-30m-C1260		13457	2.01303	1.46344	1.31712	0	0.05534	0.02765	0	0.0275
Med-SEP2014-30m-C1272		13396	1.06888	6.86989	5.40508	0.14569	0.22238	0.25	0	0.02762
Med-SEP2014-30m-C1294		13281	0.49536	2.28128	2.52717	0	0	0	0	0
Med-SEP2014-30m-C1358		12839	1.26596	0.64895	1.02805	0.33441	0.52206	0.40576	0	0.05765
Med-SEP2014-30m-C1462		12406	1.31014	7.44864	5.28924	0.53486	0.30016	0.35993	0	0.08949
Med-SEP2014-30m-C1513		12113	2.61977	1.03177	1.49439	2.09454	2.70528	2.64193	0.12828	0.70265
Med-SEP2014-30m-C1641		11547	0.13406	0.22959	0.1633	4.69863	3.74085	2.38472	0.5719	0.96143
Med-SEP2014-30m-C1685		11382	0.88401	1.53059	1.22591	0.06859	0.03272	0.35962	0	0
Med-SEP2014-30m-C1689		11366	1.22573	0.23324	0.43133	0.17171	0.06552	0	0.10253	0.19535
Med-SEP2014-30m-C1693		11339	1.43343	1.06879	1.46337	0.37865	0.6568	0.36099	0	0.16318
Med-SEP2014-30m-C1734		11179	1.21162	0.67756	1.0795	0.24441	0.26648	0.7656	0.10425	0.29792
Med-SEP2014-30m-C174	Cyanophage	41493	1.93994	1.21394	1.08155	0.31043	0.31411	0.59189	0.00936	0.10702
Med-SEP2014-30m-C1754		11104	2.54416	5.69582	4.24528	0.24606	1.37495	1.40749	0.06997	0.43324
Med-SEP2014-30m-C18		105657	5.82005	2.62739	2.53774	0.16255	0.10926	0.21836	0	0.04203
Med-SEP2014-30m-C1832	Cyanophage	10860	0.28508	0.20924	0.24308	0.07188	0	0	0	0.06815
Med-SEP2014-30m-C203		37798	0.12286	0.16031	0.2195	0.06196	0.29555	0.20674	0.03083	0.08811
Med-SEP2014-30m-C2032		10175	4.83025	2.3449	2.96505	1.18919	2.08604	1.68228	0.22906	0.61827
Med-SEP2014-30m-C251	Cyanophage	34105	0.62409	0.2332	0.22115	0.103	0.1201	0.0982	0	0.0434
Med-SEP2014-30m-C257		33624	1.89905	1.09255	1.26737	0.97512	1.60583	1.30589	0	0.17609
Med-SEP2014-30m-C293		31644	0.03669	0.04787	0.07151	3.17006	2.04757	1.17593	0.02455	0.95893
Med-SEP2014-30m-C31	Cyanophage	90389	0.17126	0.15503	0.10848	0	0	0	0	0
Med-SEP2014-30m-C326		30008	0.24503	0.21455	0.18851	0.7024	0.98033	0.54562	1.178	1.83744
Med-SEP2014-30m-C388		27578	3.1433	1.68912	0.98457	0	0.04051	0.16192	0	0.02684
Med-SEP2014-30m-C394		27318	0.76497	0.54067	0.33131	0.27147	0.53161	0.36778	0	0.14901
Med-SEP2014-30m-C454	Cyanophage	24797	1.43579	1.08437	1.09499	0.04722	0.19522	0.10504	0	0.08954
Med-SEP2014-30m-C47		79799	2.07562	1.04885	1.11057	0	0	0.0373	0.00487	0
Med-SEP2014-30m-C511		22876	2.52062	0.76155	0.95615	0.81901	0.34184	0.42293	0.11887	0.19412
Med-SEP2014-30m-C513	SAR11	22751	0.3402	0.26634	0.19891	0.06863	0.03274	0.11449	0.01707	0.0488
Med-SEP2014-30m-C516		22655	1.19574	0.68539	0.64919	0.13783	0.23012	0.27923	0	0.049
Med-SEP2014-30m-C560		21638	1.73482	7.4911	6.67509	0.19843	0.15488	0.48152	0.0359	0.0342
Med-SEP2014-30m-C566		21514	3.99331	1.90117	1.89312	9.30727	6.42146	7.472	0.97502	1.89207
Med-SEP2014-30m-C702		19189	0.36301	2.23021	2.61381	0	0	0.03879	0	0
Med-SEP2014-30m-C720		18909	2.8243	2.50357	3.21094	0.10321	0.13785	1.06267	0	0.45011
Med-SEP2014-30m-C823	Cyanophage	17544	0.63969	0.43174	0.55888	0.11124	0.12735	0.10605	0	0.04219
Med-SEP2014-30m-C87		57089	2.30477	1.53906	1.30794	0.02735	0.04566	0.09777	0	0
Med-SEP2014-30m-C883		16750	0.27725	0.11305	0.27017	0	0.02223	0	0	0.04418
Med-SEP2014-30m-C94		54438	3.6966	1.48182	1.52404	0.42303	0.25309	0.43747	0.01427	0.08157
Med-SEP2014-30m-C979		15802	1.4694	0.88677	0.95461	0.0247	0.04713	0.07065	0	0
Med-SEP2014-30m-C990		15685	6.5876	2.80086	3.24582	0.8461	0.99712	1.35228	0.37149	0.23593
MedWinter-DEC2013-20m-C127	Cyanophage	80042	0.00483	0	0.00942	0.00488	0.00931	0.01395	0.00485	0.02312
MedWinter-DEC2013-20m-C138	Cyanophage	77936	0	0	0	0.00501	0.02389	0.00477	0	0.02374
MedWinter-DEC2013-20m-C1414		21580	2.38507	0.91258	0.59416	0.90437	0.41413	0.36211	0.09001	0.63448
MedWinter-DEC2013-20m-C1440	Cyanophage	21416	0.03614	0	0	0.0729	0.39992	0.01737	0	0.22463
MedWinter-DEC2013-20m-C148		75809	20.9706	13.3086	14.1427	0.07723	0.05403	0.69211	0.01537	0.03905
MedWinter-DEC2013-20m-C160	Cyanophage	74096	1.58774	0.64401	0.52931	0.00527	0	0	0	0
MedWinter-DEC2013-20m-C17	Cyanophage	188424	1.15631	0.77785	0.60643	0.45988	0.33794	0.39892	0.07628	0.18854
MedWinter-DEC2013-20m-C1875	Cyanophage	18008	0.10745	0.04206	0	0	0	0	0	0.02055
MedWinter-DEC2013-20m-C2405		15123	0.07677	0.82641	0.44886	0.85173	0.73869	0.46751	0	0.12235
MedWinter-DEC2013-20m-C2728		13973	1.57865	0.29814	0.78268	0.47488	0.39975	0.21305	0.0278	0.26484
MedWinter-DEC2013-20m-C2965		13251	17.406	10.832	10.1031	0.35347	1.32078	1.48834	0.26383	1.39632
MedWinter-DEC2013-20m-C3133		12817	0.18116	0.41368	0.3825	0.94406	0.61012	0.49356	0.06061	0.08661
MedWinter-DEC2013-20m-C3306		12430	0.49814	0.36562	0.21237	1.31888	1.61772	1.2274	0.09375	0.50611
MedWinter-DEC2013-20m-C3341	Cyanophage	12342	0.03135	0	0	0	0	0	0	0
MedWinter-DEC2013-20m-C3379		12246	0.0316	0.46389	0.24636	0.92434	0.66897	0.48618	0.03172	0
MedWinter-DEC2013-20m-C357		49224	0.07076	0.43855	0.29879	0.70573	0.7111	0.37042	0	0.06014
MedWinter-DEC2013-20m-C3759	Cyanophage	11289	0.03428	0	0	0.31118	0.75867	0.13185	0	0.13112
MedWinter-DEC2013-20m-C4119	Cyanophage	10591	1.13273	0.71518	0.64093	0	0	0.03513	0	0
MedWinter-DEC2013-20m-C4261	SAR11	10306	6.19576	3.52777	3.40305	26.3978	33.3859	19.9668	5.12613	7.82765
MedWinter-DEC2013-20m-C4391		10094	1.03515	0.90046	0.85929	3.2482	2.95126	1.99069	0.19242	0.91652
MedWinter-DEC2013-20m-C607	Cyanophage	36133	1.478	0.60791	0.65753	0.0216	0.05153	0.05149	0	0.02048
MedWinter-DEC2013-20m-C659		34374	1.80132	0.72717	0.81185	0.62454	0.45499	0.27063	0.0791	0.46292
MedWinter-DEC2013-20m-C714	Cyanophage	32784	0.90893	0.49674	0.44862	0.07144	0.1363	0.0227	0	0.01129
MedWinter-DEC2013-20m-C816		30244	2.67429	1.06438	0.98506	0.92922	0.43093	0.38142	0.07707	0.37931
MedWinter-DEC2013-20m-C945		27581	8.39058	6.28889	7.06897	3.22664	2.72723	3.15704	1.46475	1.65029
MedWinter-JAN2015-20m-LF-C107		22383	1.65979	0.94752	0.64024	0.26158	0.41591	0.29925	0.26032	0.66131
MedWinter-JAN2015-20m-LF-C242	Cyanophage	13977	0.05537	0	0	0	0	0	0	0.05295
MedWinter-JAN2015-20m-LF-C411	Cyanophage	10262	0	0	0	0.11411	0.58059	0	0.03785	0.64909
MedWinter-JAN2015-80m-C192		24408	1.22084	0.3879	0.33991	0.1919	0.45769	0.38114	0.19098	0.8187
MedWinter-JAN2015-80m-C826		10365	1.86682	0.43846	0.76406	1.09208	0.35926	0.28721	0	0.60694
MedWinter-JAN2015-80m-C831		10331	0.07492	0.10998	0	0.11335	0.43253	0.03602	0.37601	1.32533
MedWinter-JAN2015-80m-C86		37175	0	0.03056	0.01014	1.84794	1.27214	0.45044	0.0209	0.32849
MedWinter-JAN2015-Coastal-C215		21997	2.51579	0.80919	1.04579	0.85174	0.32164	0.37216	0.10596	0.18505
MedWinter-JAN2015-Coastal-C743		10951	1.23685	0.27667	0.51655	0.21386	0.10201	0	0.07094	0.23654
